# Supplementary material for: Gut metagenome associations with extensive digital health data in a volunteer-based Estonian microbiome cohort
Source: Nat Commun. 2022 Feb 15;13:869. doi: 10.1038/s41467-022-28464-9 (PMC8847343; doi:10.1038/s41467-022-28464-9)
Supplement: Supplementary file 4 — Dataset 1 [file 41467_2022_28464_MOESM4_ESM.xlsx]

## Sheet: Metadata_summary_statistics
factor_group	factor	factor_name	format	Females	Males	All
Intrinsic	Age_at_MBsample	Age	mean (SD; min-max)	50.46 (sd 14.68; 23-89)	49.08 (sd 15.479; 24-89)	50.05 (sd 14.931; 23-89)
Intrinsic	BMI	Body mass index	mean (SD; min-max)	26.13 (sd 5.582; 15.05-54.01)	27.3 (sd 4.606; 17.76-47.49)	26.48 (sd 5.337; 15.05-54.01)
Intrinsic	BP_systolic	Blood pressure (systolic)	mean (SD; min-max)	132.43 (sd 19.235; 92-226)	141.59 (sd 16.026; 90-213)	135.14 (sd 18.811; 90-226)
Intrinsic	gender	Gender (M0F1)	n (%)	1764 (70.31)	745 (29.69)	#N/A
Intrinsic	WHR	Waist to hip ratio	mean (SD; min-max)	0.8 (sd 0.073; 0.63-1.06)	0.93 (sd 0.078; 0.72-1.2)	0.84 (sd 0.094; 0.63-1.2)
Dietary	Adds salt	Adds salt	median (min, max)	4 (1, 5)	4 (1, 5)	4 (1, 5)
Dietary	Boiled vegetables	Boiled vegetables	median (min, max)	4 (1, 8)	3 (1, 8)	4 (1, 8)
Dietary	Bread	Bread	mean (SD; min-max)	1.91 (sd 1.255; 0-8)	2.46 (sd 1.883; 0-19)	2.08 (sd 1.491; 0-19)
Dietary	Coffee	Coffee	mean (SD; min-max)	1.79 (sd 1.216; 0-10)	1.89 (sd 1.472; 0-10)	1.82 (sd 1.298; 0-10)
Dietary	Compote, jams	Compote, jams	median (min, max)	2 (1, 8)	2 (1, 8)	2 (1, 8)
Dietary	Dairy	Dairy	median (min, max)	6 (1, 8)	7 (1, 8)	7 (1, 8)
Dietary	eatingHabit_name	Eating habit - omnivore	n (%)	1507 (85.43)	680 (91.28)	2187 (87.17)
Dietary	eatingHabit_name	Eating habit - omnivore excl. milk and cream	n (%)	143 (8.11)	34 (4.56)	177 (7.05)
Dietary	eatingHabit_name	Eating habit - omnivore excl. fish	n (%)	23 (1.3)	12 (1.61)	35 (1.39)
Dietary	eatingHabit_name	Eating habit - omnivore excl. red meat	n (%)	48 (2.72)	10 (1.34)	58 (2.31)
Dietary	eatingHabit_name	Eating habit - vegan	n (%)	11 (0.62)	1 (0.13)	12 (0.48)
Dietary	eatingHabit_name	Eating habit - vegetarian eating dairy and eggs	n (%)	13 (0.74)	2 (0.27)	15 (0.6)
Dietary	eatingHabit_name	Eating habit - vegetarian eating fish - pescatarian	n (%)	17 (0.96)	3 (0.4)	20 (0.8)
Dietary	eatingHabit_name	Eating habit - vegetarian eating dairy products	n (%)	2 (0.11)	3 (0.4)	5 (0.2)
Dietary	Eggs	Eggs	median (min, max)	3 (1, 8)	3 (1, 8)	3 (1, 8)
Dietary	Fish	Fish	median (min, max)	3 (1, 8)	3 (1, 8)	3 (1, 8)
Dietary	Fresh fruit, berries	Fresh fruit, berries	median (min, max)	7 (1, 8)	5 (1, 8)	7 (1, 8)
Dietary	Fresh vegetables	Fresh vegetables	median (min, max)	5 (1, 8)	4 (1, 8)	5 (1, 8)
Dietary	isVegan	Is Vegan (N0Y1)	n (%)	11 (0.62)	1 (0.13)	12 (0.48)
Dietary	Meat	Meat	median (min, max)	4 (1, 8)	5 (1, 8)	4 (1, 8)
Dietary	Meat products (wieners, sausages)	Meat products (wieners, sausages)	median (min, max)	2 (1, 8)	4 (1, 8)	3 (1, 8)
Dietary	Porridge, muesli	Porridge, muesli	median (min, max)	3 (1, 8)	3 (1, 8)	3 (1, 8)
Dietary	Potatoes	Potatoes	median (min, max)	3 (1, 8)	4 (1, 8)	3 (1, 8)
Dietary	Rice, pasta	Rice, pasta	median (min, max)	2 (1, 8)	3 (1, 8)	2 (1, 8)
Dietary	Soft drinks	Soft drinks	median (min, max)	1 (1, 8)	2 (1, 8)	1 (1, 8)
Dietary	Sweets	Sweets	median (min, max)	5 (1, 8)	4 (1, 8)	5 (1, 8)
Dietary	Tea	Tea	mean (SD; min-max)	1.04 (sd 1.085; 0-7)	0.92 (sd 1.14; 0-8)	1 (sd 1.103; 0-8)
Dietary	Whitebread	Whitebread	mean (SD; min-max)	0.62 (sd 0.965; 0-6)	1.18 (sd 1.564; 0-20)	0.78 (sd 1.202; 0-20)
Diseases	B18	Chronic viral hepatitis (B18)	n (%)	13 (0.74)	3 (0.4)	16 (0.64)
Diseases	B37	Candidiasis (B37)	n (%)	523 (29.65)	23 (3.09)	546 (21.76)
Diseases	C18	Malignant neoplasm of colon (C18)	n (%)	20 (1.13)	6 (0.81)	26 (1.04)
Diseases	chickenpox	Has had chickenpox (N0Y1)	n (%)	1372 (77.78)	481 (64.56)	1853 (73.85)
Diseases	D10	Benign neoplasm of mouth and pharynx (D10)	n (%)	7 (0.4)	3 (0.4)	10 (0.4)
Diseases	D12	Benign neoplasm of colon, rectum, anus and anal canal (D12)	n (%)	18 (1.02)	11 (1.48)	29 (1.16)
Diseases	D50	Iron deficiency anemia (D50)	n (%)	316 (17.91)	22 (2.95)	338 (13.47)
Diseases	D51	Vitamin B12 deficiency anemia (D51)	n (%)	32 (1.81)	10 (1.34)	42 (1.67)
Diseases	E10	Type 1 diabetes mellitus (E10)	n (%)	11 (0.62)	3 (0.4)	14 (0.56)
Diseases	E11	Type 2 diabetes mellitus (E11)	n (%)	78 (4.42)	40 (5.37)	118 (4.7)
Diseases	E28	Ovarian dysfunction (E28)	n (%)	103 (5.84)	#N/A	103 (4.11)
Diseases	E55	Vitamin D deficiency (E55)	n (%)	108 (6.12)	25 (3.36)	133 (5.3)
Diseases	E73	Lactose intolerance (E73)	n (%)	35 (1.98)	8 (1.07)	43 (1.71)
Diseases	E78	Disorders of lipoprotein metabolism and other lipidemias (E78)	n (%)	349 (19.78)	193 (25.91)	542 (21.6)
Diseases	F20	Schizophrenia (F20)	n (%)	5 (0.28)	5 (0.67)	10 (0.4)
Diseases	F31	Bipolar disorder (F31)	n (%)	10 (0.57)	3 (0.4)	13 (0.52)
Diseases	F32	Major depressive disorder, single episode (F32)	n (%)	411 (23.3)	115 (15.44)	526 (20.96)
Diseases	F33	Major depressive disorder, recurrent (F33)	n (%)	192 (10.88)	61 (8.19)	253 (10.08)
Diseases	F41	Other anxiety disorders (F41)	n (%)	305 (17.29)	91 (12.21)	396 (15.78)
Diseases	F50	Eating disorders (F50)	n (%)	21 (1.19)	1 (0.13)	22 (0.88)
Diseases	G20	Parkinson's disease (G20)	n (%)	6 (0.34)	8 (1.07)	14 (0.56)
Diseases	G40	Epilepsy and recurrent seizures (G40)	n (%)	19 (1.08)	13 (1.74)	32 (1.28)
Diseases	G43	Migraine (G43)	n (%)	156 (8.84)	28 (3.76)	184 (7.33)
Diseases	gumDiseaseDiagnosed	Has been diagnosed with gum disease (N0Y1)	n (%)	240 (13.61)	104 (13.96)	344 (13.71)
Diseases	H25	Age-related cataract (H25)	n (%)	216 (12.24)	72 (9.66)	288 (11.48)
Diseases	H40	Glaucoma (H40)	n (%)	117 (6.63)	35 (4.7)	152 (6.06)
Diseases	health_status_ok	Self reported physical health status OK (N0Y1)	n (%)	825 (46.77)	387 (51.95)	1212 (48.31)
Diseases	I10	Essential (primary) hypertension (I10)	n (%)	389 (22.05)	220 (29.53)	609 (24.27)
Diseases	I11	Hypertensive heart disease (I11)	n (%)	299 (16.95)	192 (25.77)	491 (19.57)
Diseases	I25	Chronic ischemic heart disease (I25)	n (%)	75 (4.25)	78 (10.47)	153 (6.1)
Diseases	I48	Atrial fibrillation and flutter (I48)	n (%)	62 (3.51)	67 (8.99)	129 (5.14)
Diseases	I49	Other cardiac arrhythmias (I49)	n (%)	277 (15.7)	115 (15.44)	392 (15.62)
Diseases	I50	Heart failure (I50)	n (%)	78 (4.42)	59 (7.92)	137 (5.46)
Diseases	I70	Atherosclerosis (I70)	n (%)	16 (0.91)	23 (3.09)	39 (1.55)
Diseases	I84	Haemorrhoids (I84)	n (%)	237 (13.44)	97 (13.02)	334 (13.31)
Diseases	J02	Acute pharyngitis (J02)	n (%)	389 (22.05)	143 (19.19)	532 (21.2)
Diseases	J03	Acute tonsillitis (J03)	n (%)	182 (10.32)	58 (7.79)	240 (9.57)
Diseases	J20	Acute bronchitis (J20)	n (%)	415 (23.53)	153 (20.54)	568 (22.64)
Diseases	J30	Vasomotor and allergic rhinitis (J30)	n (%)	394 (22.34)	155 (20.81)	549 (21.88)
Diseases	J31	Chronic rhinitis, nasopharyngitis and pharyngitis (J31)	n (%)	127 (7.2)	44 (5.91)	171 (6.82)
Diseases	J35	Chronic diseases of tonsils and adenoids (J35)	n (%)	463 (26.25)	151 (20.27)	614 (24.47)
Diseases	J45	Asthma (J45)	n (%)	184 (10.43)	56 (7.52)	240 (9.57)
Diseases	K21	Gastro-esophageal reflux disease (K21)	n (%)	411 (23.3)	147 (19.73)	558 (22.24)
Diseases	K25	Gastric ulcer (K25)	n (%)	37 (2.1)	29 (3.89)	66 (2.63)
Diseases	K29	Gastritis and duodenitis (K29)	n (%)	324 (18.37)	108 (14.5)	432 (17.22)
Diseases	K35	Acute appendicitis (K35)	n (%)	29 (1.64)	22 (2.95)	51 (2.03)
Diseases	K50	Crohn's disease [regional enteritis] (K50)	n (%)	12 (0.68)	2 (0.27)	14 (0.56)
Diseases	K51	Ulcerative colitis (K51)	n (%)	8 (0.45)	6 (0.81)	14 (0.56)
Diseases	K52	Other and unsp noninfective gastroenteritis and colitis (K52)	n (%)	13 (0.74)	8 (1.07)	21 (0.84)
Diseases	K58	Irritable bowel syndrome (K58)	n (%)	135 (7.65)	48 (6.44)	183 (7.29)
Diseases	K80	Cholelithiasis (K80)	n (%)	138 (7.82)	35 (4.7)	173 (6.9)
Diseases	L20	Atopic dermatitis (L20)	n (%)	69 (3.91)	22 (2.95)	91 (3.63)
Diseases	L40	Psoriasis (L40)	n (%)	61 (3.46)	22 (2.95)	83 (3.31)
Diseases	L70	Acne (L70)	n (%)	230 (13.04)	51 (6.85)	281 (11.2)
Diseases	M05	Rheumatoid arthritis with rheumatoid factor (M05)	n (%)	31 (1.76)	3 (0.4)	34 (1.36)
Diseases	M06	Other rheumatoid arthritis (M06)	n (%)	88 (4.99)	12 (1.61)	100 (3.99)
Diseases	M10	Gout (M10)	n (%)	30 (1.7)	52 (6.98)	82 (3.27)
Diseases	M13	Other arthritis (M13)	n (%)	86 (4.88)	37 (4.97)	123 (4.9)
Diseases	M15	Polyosteoarthritis (M15)	n (%)	254 (14.4)	57 (7.65)	311 (12.4)
Diseases	M80	Osteoporosis with current pathological fracture (M80)	n (%)	50 (2.83)	4 (0.54)	54 (2.15)
Diseases	M81	Osteoporosis without current pathological fracture (M81)	n (%)	74 (4.2)	7 (0.94)	81 (3.23)
Diseases	mental_health_status_ok	Self reported mental health status OK (N0Y1)	n (%)	967 (54.82)	458 (61.48)	1425 (56.8)
Diseases	N10	Acute tubulo-interstitial nephritis (N10)	n (%)	51 (2.89)	4 (0.54)	55 (2.19)
Diseases	N11	Chronic tubulo-interstitial nephritis (N11)	n (%)	59 (3.34)	7 (0.94)	66 (2.63)
Diseases	N18	Chronic kidney disease (CKD) (N18)	n (%)	23 (1.3)	9 (1.21)	32 (1.28)
Diseases	N20	Calculus of kidney and ureter (N20)	n (%)	49 (2.78)	29 (3.89)	78 (3.11)
Diseases	N80	Endometriosis (N80)	n (%)	68 (3.85)	#N/A	68 (2.71)
Diseases	N81	Female genital prolapse (N81)	n (%)	104 (5.9)	#N/A	104 (4.15)
Diseases	N95	Menopausal and other perimenopausal disorders (N95)	n (%)	491 (27.83)	#N/A	491 (19.57)
Diseases	N97	Female infertility (N97)	n (%)	122 (6.92)	1 (0.13)	123 (4.9)
Diseases	seasonableAllergy	Has seasonable allergy (N0Y1)	n (%)	414 (23.47)	118 (15.84)	532 (21.2)
Medications	A02BC01	Omeprazole (A02BC01)	n (%)	40 (2.27)	13 (1.74)	53 (2.11)
Medications	A02BC02	Pantoprazole (A02BC02)	n (%)	22 (1.25)	15 (2.01)	37 (1.47)
Medications	A02BC05	Esomeprazole (A02BC05)	n (%)	35 (1.98)	14 (1.88)	49 (1.95)
Medications	A03AA04	Mebeverine (A03AA04)	n (%)	11 (0.62)	3 (0.4)	14 (0.56)
Medications	A07EC	Aminosalicylic acid and similar agents (A07EC)	n (%)	10 (0.57)	4 (0.54)	14 (0.56)
Medications	A09AA02	Lipase+amylase+protease (A09AA02)	n (%)	10 (0.57)	1 (0.13)	11 (0.44)
Medications	A10AE	Insulins and analogues for injection, long-acting (A10AE)	n (%)	7 (0.4)	3 (0.4)	10 (0.4)
Medications	A10B	Blood glucose lowering drugs, excl. insulins (A10B)	n (%)	12 (0.68)	6 (0.81)	18 (0.72)
Medications	A10BA02	Metformin (A10BA02)	n (%)	24 (1.36)	20 (2.68)	44 (1.75)
Medications	antibiotics_history_cont	Antibiotics usage history (last 10 years)	mean (SD; min-max)	5.07 (sd 4.902; 0-42)	3.82 (sd 4.165; 0-32)	4.69 (sd 4.724; 0-42)
Medications	antibiotics_history_quartile	Antibiotics usage history group (last 10 years) - [1,2]	n (%)	359 (20.35)	190 (25.5)	549 (21.88)
Medications	antibiotics_history_quartile	Antibiotics usage history group (last 10 years) - [3,4]	n (%)	296 (16.78)	144 (19.33)	440 (17.54)
Medications	antibiotics_history_quartile	Antibiotics usage history group (last 10 years) - [5,7]	n (%)	307 (17.4)	88 (11.81)	395 (15.74)
Medications	antibiotics_history_quartile	Antibiotics usage history group (last 10 years) - [8,42]	n (%)	308 (17.46)	92 (12.35)	400 (15.94)
Medications	antibiotics_history_quartile	Antibiotics usage history group (last 10 years) - Not used	n (%)	138 (7.82)	105 (14.09)	243 (9.69)
Medications	antibiotics_history_quartile	Antibiotics usage history group (last 10 years) - NA	n (%)	356 (20.18)	126 (16.91)	482 (19.21)
Medications	antidepressants_history_cont	Antidepressants usage history (last 10 years)	mean (SD; min-max)	1.88 (sd 5.596; 0-55)	0.91 (sd 3.384; 0-36)	1.58 (sd 5.048; 0-55)
Medications	antidepressants_history_quartile	Antidepressants usage history group (last 10 years) - [1,2]	n (%)	132 (7.48)	56 (7.52)	188 (7.49)
Medications	antidepressants_history_quartile	Antidepressants usage history group (last 10 years) - [10,55]	n (%)	96 (5.44)	19 (2.55)	115 (4.58)
Medications	antidepressants_history_quartile	Antidepressants usage history group (last 10 years) - [3,4]	n (%)	76 (4.31)	20 (2.68)	96 (3.83)
Medications	antidepressants_history_quartile	Antidepressants usage history group (last 10 years) - [5,9]	n (%)	88 (4.99)	21 (2.82)	109 (4.34)
Medications	antidepressants_history_quartile	Antidepressants usage history group (last 10 years) - Not used	n (%)	1188 (67.35)	573 (76.91)	1761 (70.19)
Medications	antidepressants_history_quartile	Antidepressants usage history group (last 10 years) - NA	n (%)	184 (10.43)	56 (7.52)	240 (9.57)
Medications	B01A	Antithrombotic agents (B01A)	n (%)	13 (0.74)	7 (0.94)	20 (0.8)
Medications	B01AA03	Warfarin (B01AA03)	n (%)	7 (0.4)	9 (1.21)	16 (0.64)
Medications	B01AF01	Rivaroxaban (B01AF01)	n (%)	13 (0.74)	8 (1.07)	21 (0.84)
Medications	B01AF02	Apixaban (B01AF02)	n (%)	8 (0.45)	4 (0.54)	12 (0.48)
Medications	B03B	Vitamin b12 and folic acid (B03B)	n (%)	9 (0.51)	2 (0.27)	11 (0.44)
Medications	C01BC03	Propafenone (C01BC03)	n (%)	12 (0.68)	6 (0.81)	18 (0.72)
Medications	C01DA	Organic nitrates (C01DA)	n (%)	6 (0.34)	4 (0.54)	10 (0.4)
Medications	C01EB15	Trimetazidine (C01EB15)	n (%)	17 (0.96)	6 (0.81)	23 (0.92)
Medications	C03BA11	Indapamide (C03BA11)	n (%)	8 (0.45)	5 (0.67)	13 (0.52)
Medications	C03CA04	Torasemide (C03CA04)	n (%)	5 (0.28)	6 (0.81)	11 (0.44)
Medications	C05AA84	Fluocortolone+lidocaine (C05AA84)	n (%)	12 (0.68)	4 (0.54)	16 (0.64)
Medications	C07A	Beta blocking agents (C07A)	n (%)	12 (0.68)	7 (0.94)	19 (0.76)
Medications	C07AA05	Propranolol (C07AA05)	n (%)	6 (0.34)	5 (0.67)	11 (0.44)
Medications	C07AB02	Metoprolol (C07AB02)	n (%)	94 (5.33)	48 (6.44)	142 (5.66)
Medications	C07AB12	Nebivolol (C07AB12)	n (%)	31 (1.76)	20 (2.68)	51 (2.03)
Medications	C08CA	Dihydropyridine derivatives (C08CA)	n (%)	9 (0.51)	3 (0.4)	12 (0.48)
Medications	C08CA01	Amlodipine (C08CA01)	n (%)	28 (1.59)	14 (1.88)	42 (1.67)
Medications	C08CA13	Lercanidipine (C08CA13)	n (%)	8 (0.45)	5 (0.67)	13 (0.52)
Medications	C09AA02	Enalapril (C09AA02)	n (%)	7 (0.4)	4 (0.54)	11 (0.44)
Medications	C09AA04	Perindopril (C09AA04)	n (%)	8 (0.45)	13 (1.74)	21 (0.84)
Medications	C09AA05	Ramipril (C09AA05)	n (%)	28 (1.59)	19 (2.55)	47 (1.87)
Medications	C09BA	Ace inhibitors and diuretics (C09BA)	n (%)	10 (0.57)	5 (0.67)	15 (0.6)
Medications	C09BA04	Perindopril+indapamide (C09BA04)	n (%)	20 (1.13)	16 (2.15)	36 (1.43)
Medications	C09BB04	Perindopril+amlodipine (C09BB04)	n (%)	8 (0.45)	6 (0.81)	14 (0.56)
Medications	C09BX01	Perindopril+amlodipine+indapamide (C09BX01)	n (%)	11 (0.62)	10 (1.34)	21 (0.84)
Medications	C09CA	Angiotensin ii antagonists, plain (C09CA)	n (%)	15 (0.85)	9 (1.21)	24 (0.96)
Medications	C09CA06	Candesartan (C09CA06)	n (%)	9 (0.51)	4 (0.54)	13 (0.52)
Medications	C09CA07	Telmisartan (C09CA07)	n (%)	36 (2.04)	16 (2.15)	52 (2.07)
Medications	C09DA	Angiotensin ii antagonists and diuretics (C09DA)	n (%)	13 (0.74)	7 (0.94)	20 (0.8)
Medications	C09DA07	Telmisartan+hydrochlorothiazide (C09DA07)	n (%)	18 (1.02)	6 (0.81)	24 (0.96)
Medications	C09DB04	Telmisartan+amlodipine (C09DB04)	n (%)	7 (0.4)	8 (1.07)	15 (0.6)
Medications	C10AA01	Simvastatin (C10AA01)	n (%)	13 (0.74)	11 (1.48)	24 (0.96)
Medications	C10AA05	Atorvastatin (C10AA05)	n (%)	27 (1.53)	38 (5.1)	65 (2.59)
Medications	C10AA07	Rosuvastatin (C10AA07)	n (%)	35 (1.98)	20 (2.68)	55 (2.19)
Medications	D01A	Antifungals for topical use (D01A)	n (%)	8 (0.45)	2 (0.27)	10 (0.4)
Medications	D01AC80	Isoconazole+diflucortolone (D01AC80)	n (%)	11 (0.62)	2 (0.27)	13 (0.52)
Medications	D07AC	Corticosteroids, potent (group iii) (D07AC)	n (%)	8 (0.45)	2 (0.27)	10 (0.4)
Medications	D07AC13	Mometasone (D07AC13)	n (%)	7 (0.4)	7 (0.94)	14 (0.56)
Medications	D07B	Corticosteroids, combinations with antiseptics (D07B)	n (%)	7 (0.4)	4 (0.54)	11 (0.44)
Medications	D07CC80	Betamethasone+fusidic acid (D07CC80)	n (%)	7 (0.4)	4 (0.54)	11 (0.44)
Medications	D10AF	Antiinfectives for treatment of acne (D10AF)	n (%)	11 (0.62)	2 (0.27)	13 (0.52)
Medications	D11A	Other dermatological preparations (D11A)	n (%)	7 (0.4)	4 (0.54)	11 (0.44)
Medications	G01A	Antiinfectives and antiseptics, excl. combinations with corticosteroids (G01A)	n (%)	15 (0.85)	#N/A	15 (0.6)
Medications	G01AF	Imidazole derivatives (G01AF)	n (%)	18 (1.02)	#N/A	18 (0.72)
Medications	G02BA03	Levonorgestrel (G02BA03)	n (%)	10 (0.57)	#N/A	10 (0.4)
Medications	G03AA	Progestogens and estrogens, fixed combinations (G03AA)	n (%)	13 (0.74)	#N/A	13 (0.52)
Medications	G03AA10	Gestodene+ethinylestradiol (G03AA10)	n (%)	16 (0.91)	#N/A	16 (0.64)
Medications	G03AA12	Drospirenone+ethinylestradiol (G03AA12)	n (%)	28 (1.59)	#N/A	28 (1.12)
Medications	G03AA16	Dienogest+ethinylestradiol (G03AA16)	n (%)	11 (0.62)	#N/A	11 (0.44)
Medications	G03AC09	Desogestrel (G03AC09)	n (%)	15 (0.85)	#N/A	15 (0.6)
Medications	G03CA03	Estradiol (G03CA03)	n (%)	30 (1.7)	#N/A	30 (1.2)
Medications	G03D	Progestogens (G03D)	n (%)	15 (0.85)	#N/A	15 (0.6)
Medications	G03FA	Progestogens and estrogens, fixed combinations (G03FA)	n (%)	15 (0.85)	#N/A	15 (0.6)
Medications	G03G	Gonadotropins and other ovulation stimulants (G03G)	n (%)	8 (0.45)	2 (0.27)	10 (0.4)
Medications	G04BD	Drugs for urinary frequency and incontinence (G04BD)	n (%)	8 (0.45)	4 (0.54)	12 (0.48)
Medications	G04BE03	Sildenafil (G04BE03)	n (%)	#N/A	13 (1.74)	13 (0.52)
Medications	G04CA01	Alfuzosin (G04CA01)	n (%)	#N/A	10 (1.34)	10 (0.4)
Medications	G04CA02	Tamsulosin (G04CA02)	n (%)	#N/A	25 (3.36)	25 (1)
Medications	G04CA52	Tamsulosin+dutasteride (G04CA52)	n (%)	#N/A	13 (1.74)	13 (0.52)
Medications	H02AB	Glucocorticoids (H02AB)	n (%)	18 (1.02)	7 (0.94)	25 (1)
Medications	H03AA01	Levothyroxine sodium (H03AA01)	n (%)	87 (4.93)	7 (0.94)	94 (3.75)
Medications	J02AC01	Fluconazole (J02AC01)	n (%)	8 (0.45)	2 (0.27)	10 (0.4)
Medications	J05A	Direct acting antivirals (J05A)	n (%)	12 (0.68)	5 (0.67)	17 (0.68)
Medications	J05AB11	Valaciclovir (J05AB11)	n (%)	24 (1.36)	3 (0.4)	27 (1.08)
Medications	J07BA01	Encephalitis, tick borne, inactivated, whole virus (J07BA01)	n (%)	20 (1.13)	4 (0.54)	24 (0.96)
Medications	J07BB02	Influenza, inactivated, split virus or surface antigen (J07BB02)	n (%)	25 (1.42)	12 (1.61)	37 (1.47)
Medications	L04AX	Other immunosuppressants (L04AX)	n (%)	9 (0.51)	1 (0.13)	10 (0.4)
Medications	M01A	Antiinflammatory and antirheumatic products, non-steroids (M01A)	n (%)	9 (0.51)	5 (0.67)	14 (0.56)
Medications	M01AB05	Diclofenac (M01AB05)	n (%)	21 (1.19)	7 (0.94)	28 (1.12)
Medications	M01AC05	Lornoxicam (M01AC05)	n (%)	9 (0.51)	2 (0.27)	11 (0.44)
Medications	M01AC06	Meloxicam (M01AC06)	n (%)	14 (0.79)	8 (1.07)	22 (0.88)
Medications	M01AE	Propionic acid derivatives (M01AE)	n (%)	11 (0.62)	#N/A	11 (0.44)
Medications	M01AE01	Ibuprofen (M01AE01)	n (%)	8 (0.45)	3 (0.4)	11 (0.44)
Medications	M01AE03	Ketoprofen (M01AE03)	n (%)	12 (0.68)	#N/A	12 (0.48)
Medications	M01AE52	Naproxen+esomeprazole (M01AE52)	n (%)	11 (0.62)	6 (0.81)	17 (0.68)
Medications	M01AH01	Celecoxib (M01AH01)	n (%)	8 (0.45)	5 (0.67)	13 (0.52)
Medications	M01AH05	Etoricoxib (M01AH05)	n (%)	47 (2.66)	19 (2.55)	66 (2.63)
Medications	M01AX05	Glucosamine (M01AX05)	n (%)	21 (1.19)	5 (0.67)	26 (1.04)
Medications	M03BX02	Tizanidine (M03BX02)	n (%)	11 (0.62)	2 (0.27)	13 (0.52)
Medications	M04AA01	Allopurinol (M04AA01)	n (%)	10 (0.57)	17 (2.28)	27 (1.08)
Medications	M05BB03	Alendronic acid+colecalciferol (M05BB03)	n (%)	15 (0.85)	1 (0.13)	16 (0.64)
Medications	N02A	Opioids (N02A)	n (%)	8 (0.45)	2 (0.27)	10 (0.4)
Medications	N02AJ06	N02AJ06	n (%)	18 (1.02)	7 (0.94)	25 (1)
Medications	N02AX02	Tramadol (N02AX02)	n (%)	13 (0.74)	7 (0.94)	20 (0.8)
Medications	N02CC01	Sumatriptan (N02CC01)	n (%)	11 (0.62)	4 (0.54)	15 (0.6)
Medications	N03A	Antiepileptics (N03A)	n (%)	17 (0.96)	6 (0.81)	23 (0.92)
Medications	N03AX12	Gabapentin (N03AX12)	n (%)	10 (0.57)	2 (0.27)	12 (0.48)
Medications	N03AX16	Pregabalin (N03AX16)	n (%)	10 (0.57)	5 (0.67)	15 (0.6)
Medications	N04B	Dopaminergic agents (N04B)	n (%)	2 (0.11)	8 (1.07)	10 (0.4)
Medications	N05AH04	Quetiapine (N05AH04)	n (%)	14 (0.79)	7 (0.94)	21 (0.84)
Medications	N05BA	Benzodiazepine derivatives (N05BA)	n (%)	10 (0.57)	1 (0.13)	11 (0.44)
Medications	N05BA01	Diazepam (N05BA01)	n (%)	24 (1.36)	8 (1.07)	32 (1.28)
Medications	N05BA12	Alprazolam (N05BA12)	n (%)	37 (2.1)	10 (1.34)	47 (1.87)
Medications	N05CF01	Zopiclone (N05CF01)	n (%)	36 (2.04)	18 (2.42)	54 (2.15)
Medications	N05CF02	Zolpidem (N05CF02)	n (%)	11 (0.62)	7 (0.94)	18 (0.72)
Medications	N06AA	Non-selective monoamine reuptake inhibitors (N06AA)	n (%)	9 (0.51)	4 (0.54)	13 (0.52)
Medications	N06AB	Selective serotonin reuptake inhibitors (N06AB)	n (%)	8 (0.45)	3 (0.4)	11 (0.44)
Medications	N06AB05	Paroxetine (N06AB05)	n (%)	6 (0.34)	4 (0.54)	10 (0.4)
Medications	N06AB06	Sertraline (N06AB06)	n (%)	16 (0.91)	7 (0.94)	23 (0.92)
Medications	N06AB10	Escitalopram (N06AB10)	n (%)	33 (1.87)	11 (1.48)	44 (1.75)
Medications	N06AX	Other antidepressants (N06AX)	n (%)	16 (0.91)	4 (0.54)	20 (0.8)
Medications	N06AX12	Bupropione (N06AX12)	n (%)	9 (0.51)	5 (0.67)	14 (0.56)
Medications	N06AX16	Venlafaxine (N06AX16)	n (%)	9 (0.51)	3 (0.4)	12 (0.48)
Medications	N06AX21	Duloxetine (N06AX21)	n (%)	18 (1.02)	6 (0.81)	24 (0.96)
Medications	N06AX22	Agomelatine (N06AX22)	n (%)	11 (0.62)	3 (0.4)	14 (0.56)
Medications	N07CA01	Betahistine (N07CA01)	n (%)	15 (0.85)	1 (0.13)	16 (0.64)
Medications	R01AD	Corticosteroids (R01AD)	n (%)	10 (0.57)	1 (0.13)	11 (0.44)
Medications	R01AD09	Mometasone (R01AD09)	n (%)	15 (0.85)	7 (0.94)	22 (0.88)
Medications	R01AD12	Fluticasone furoate (R01AD12)	n (%)	17 (0.96)	6 (0.81)	23 (0.92)
Medications	R01BA93	Pseudoephedrine+cetirizine (R01BA93)	n (%)	13 (0.74)	3 (0.4)	16 (0.64)
Medications	R03A	Adrenergics, inhalants (R03A)	n (%)	6 (0.34)	6 (0.81)	12 (0.48)
Medications	R03AK	Adrenergics in combination with corticosteroids or other drugs, excl. anticholinergics (R03AK)	n (%)	7 (0.4)	3 (0.4)	10 (0.4)
Medications	R03AK07	Formoterol+budesonide (R03AK07)	n (%)	8 (0.45)	4 (0.54)	12 (0.48)
Medications	R03AK10	Vilanterol+fluticasone furoate (R03AK10)	n (%)	8 (0.45)	3 (0.4)	11 (0.44)
Medications	R06AE07	Cetirizine (R06AE07)	n (%)	6 (0.34)	4 (0.54)	10 (0.4)
Medications	R06AX	Other antihistamines for systemic use (R06AX)	n (%)	17 (0.96)	2 (0.27)	19 (0.76)
Medications	S01AA	Antibiotics (S01AA)	n (%)	11 (0.62)	5 (0.67)	16 (0.64)
Medications	S01CA81	Dexamethasone+tobramycin (S01CA81)	n (%)	7 (0.4)	3 (0.4)	10 (0.4)
Medications	S01CA82	Dexamethasone+chloramphenicol (S01CA82)	n (%)	19 (1.08)	4 (0.54)	23 (0.92)
Medications	S01ED	Beta blocking agents (S01ED)	n (%)	19 (1.08)	4 (0.54)	23 (0.92)
Medications	S01ED01	Timolol (S01ED01)	n (%)	9 (0.51)	1 (0.13)	10 (0.4)
Medications	S01EE	Prostaglandin analogues (S01EE)	n (%)	4 (0.23)	6 (0.81)	10 (0.4)
Medications	S01EE01	Latanoprost (S01EE01)	n (%)	12 (0.68)	6 (0.81)	18 (0.72)
Procedures	Anesteesia	Anesthesia (last 6 months)	n (%)	32 (1.81)	15 (2.01)	47 (1.87)
Procedures	cecumRemoved	Cecum removed (N0Y1)	n (%)	336 (19.05)	150 (20.13)	486 (19.37)
Procedures	II astme intensiivravi	Intensive care (last 6 months)	n (%)	8 (0.45)	4 (0.54)	12 (0.48)
Procedures	Koloskoopia	Coloscopy (last 6 months)	n (%)	6 (0.34)	11 (1.48)	17 (0.68)
Procedures	tonsilsRemoved	Tonsils removed (N0Y1)	n (%)	620 (35.15)	238 (31.95)	858 (34.2)
Other	alcohol_frequency_category	Alcohol consumption frequency - Average	n (%)	795 (45.07)	418 (56.11)	1213 (48.35)
Other	alcohol_frequency_category	Alcohol consumption frequency - High	n (%)	27 (1.53)	73 (9.8)	100 (3.99)
Other	alcohol_frequency_category	Alcohol consumption frequency - Low	n (%)	757 (42.91)	239 (32.08)	996 (39.7)
Other	alcohol_frequency_category	Alcohol consumption frequency - NA	n (%)	185 (10.49)	15 (2.01)	200 (7.97)
Other	alcohol_has_used	Has used alcohol (N0Y1)	n (%)	1579 (89.51)	730 (97.99)	2309 (92.03)
Other	birthPlace_typeCity	Birthplace type city (N0Y1)	n (%)	981 (55.61)	406 (54.5)	1387 (55.28)
Other	bornByCaesereanSection	Born by caeserean section (N0Y1)	n (%)	32 (1.81)	19 (2.55)	51 (2.03)
Other	doesPhysicalExercise	Does physical exercise (N0Y1)	n (%)	1248 (70.75)	567 (76.11)	1815 (72.34)
Other	dringingWaterAtHome_well	Drinkingwater from well (N0Y1)	n (%)	188 (10.66)	84 (11.28)	272 (10.84)
Other	foodBabyFirstMonths_breastmilk	Breastmilk in first monthes (N0Y1)	n (%)	1209 (68.54)	572 (76.78)	1781 (70.98)
Other	frequencyGutEmpting_name	Gut emptying frequency - twice a day	n (%)	307 (17.4)	210 (28.19)	517 (20.61)
Other	frequencyGutEmpting_name	Gut emptying frequency - three to six times a week	n (%)	319 (18.08)	84 (11.28)	403 (16.06)
Other	frequencyGutEmpting_name	Gut emptying frequency - very irregularly, none of the other answers match	n (%)	11 (0.62)	3 (0.4)	14 (0.56)
Other	frequencyGutEmpting_name	Gut emptying frequency - less than once a week	n (%)	3 (0.17)	#N/A	3 (0.12)
Other	frequencyGutEmpting_name	Gut emptying frequency - once a day	n (%)	992 (56.24)	403 (54.09)	1395 (55.6)
Other	frequencyGutEmpting_name	Gut emptying frequency - once or twice a week	n (%)	95 (5.39)	14 (1.88)	109 (4.34)
Other	frequencyGutEmpting_name	Gut emptying frequency - more than three times a day	n (%)	34 (1.93)	29 (3.89)	63 (2.51)
Other	frequencyGutEmpting_name	Gut emptying frequency - NA	n (%)	3 (0.17)	2 (0.27)	5 (0.2)
Other	frequencyTakenProbiotic_name	Probiotics usage frequency - from time to time (once or twice a week)	n (%)	110 (6.24)	35 (4.7)	145 (5.78)
Other	frequencyTakenProbiotic_name	Probiotics usage frequency - seldom (seldom/a couple of times a month)	n (%)	753 (42.69)	228 (30.6)	981 (39.1)
Other	frequencyTakenProbiotic_name	Probiotics usage frequency - daily	n (%)	29 (1.64)	11 (1.48)	40 (1.59)
Other	frequencyTakenProbiotic_name	Probiotics usage frequency - never	n (%)	816 (46.26)	455 (61.07)	1271 (50.66)
Other	frequencyTakenProbiotic_name	Probiotics usage frequency - regularly (three to five times a week)	n (%)	54 (3.06)	14 (1.88)	68 (2.71)
Other	frequencyTakenProbiotic_name	Probiotics usage frequency - NA	n (%)	2 (0.11)	2 (0.27)	4 (0.16)
Other	has_smoked	Has smoked (N0Y1)	n (%)	637 (36.11)	392 (52.62)	1029 (41.01)
Other	has_smoked_lastYear	Has smoked last year (N0Y1)	n (%)	222 (12.59)	139 (18.66)	361 (14.39)
Other	hasPets	Has pets (N0Y1)	n (%)	916 (51.93)	338 (45.37)	1254 (49.98)
Other	nationalityEstonian	Estonian nationality (N0Y1)	n (%)	#N/A	#N/A	2465 (98.25)
Other	samplingSeason	Sampling season - Autumn	n (%)	436 (24.72)	162 (21.74)	598 (23.83)
Other	samplingSeason	Sampling season - Spring	n (%)	453 (25.68)	228 (30.6)	681 (27.14)
Other	samplingSeason	Sampling season - Summer	n (%)	400 (22.68)	149 (20)	549 (21.88)
Other	samplingSeason	Sampling season - Winter	n (%)	464 (26.3)	199 (26.71)	663 (26.42)
Other	samplingSeason	Sampling season - NA	n (%)	11 (0.62)	7 (0.94)	18 (0.72)
Other	usualStoolType_category	Stool consistenct - Constipation	n (%)	429 (24.32)	131 (17.58)	560 (22.32)
Other	usualStoolType_category	Stool consistenct - Diarrhea	n (%)	305 (17.29)	137 (18.39)	442 (17.62)
Other	usualStoolType_category	Stool consistenct - Normal	n (%)	962 (54.54)	444 (59.6)	1406 (56.04)
Other	usualStoolType_category	Stool consistenct - NA	n (%)	68 (3.85)	33 (4.43)	101 (4.03)
