# Supplementary material for: Gut metagenome associations with extensive digital health data in a volunteer-based Estonian microbiome cohort
Source: Nat Commun. 2022 Feb 15;13:869. doi: 10.1038/s41467-022-28464-9 (PMC8847343; doi:10.1038/s41467-022-28464-9)
Supplement: Supplementary file 5 — Dataset 2 [file 41467_2022_28464_MOESM5_ESM.xlsx]

## Sheet: Kingdom_summary_statistics
kingdom_print	Prevalence	Mean Relative Abundance (%)	Min Relative Abundance (%)	Max Relative Abundance (%)
Bacteria	100	98.5057	64.1203	99.7394
Viruses	100	0.547409	0.00357189	20.1445
Eukaryota	100	0.353958	0.0312385	5.87585
Archaea	100	0.0834673	0.00100922	3.82168

## Sheet: Phylum_summary_statistics
phylum_print	Prevalence	Mean Relative Abundance (%)	Min Relative Abundance (%)	Max Relative Abundance (%)
Bacteroidetes (Bacteria)	100	56.2308	1.10339	95.1694
Firmicutes (Bacteria)	100	33.733	2.36171	91.629
Proteobacteria (Bacteria)	100	5.33218	0.844186	43.438
Actinobacteria (Bacteria)	100	0.960143	0.099555	10.6224
Unclassified (Viruses)	100	0.573174	0.00363965	24.2404
Verrucomicrobia (Bacteria)	100	0.564572	0.00182739	15.8483
Unclassified (Bacteria)	100	0.435076	0.0719008	11.3015
Candidatus Melainabacteria (Bacteria)	100	0.358152	8.97211e-05	20.3298
Chlamydiae (Bacteria)	100	0.334684	0.0269664	10.8257
Lentisphaerae (Bacteria)	100	0.301884	4.98546e-05	8.80837
Tenericutes (Bacteria)	100	0.259163	0.000120878	6.59423
Unclassified (Eukaryota)	100	0.236976	0.000440849	5.74061
Fusobacteria (Bacteria)	100	0.097142	0.000144905	8.36887
Euryarchaeota (Archaea)	100	0.0825531	0.00091014	3.96436
Cyanobacteria (Bacteria)	100	0.0798376	0.00629724	0.276634
Elusimicrobia (Bacteria)	99.6409	0.072877	0	13.3259
Spirochaetes (Bacteria)	100	0.0612112	0.000377471	8.46712
Streptophyta (Eukaryota)	100	0.0361812	0.00836405	0.303592
Ascomycota (Eukaryota)	100	0.0327329	0.00269762	0.0814744
Nematoda (Eukaryota)	100	0.0320288	0.00331615	0.273714
Synergistetes (Bacteria)	100	0.0221532	8.05029e-06	1.72262
Acidobacteria (Bacteria)	100	0.0185625	3.56828e-05	0.390194
Arthropoda (Eukaryota)	100	0.0174324	0.00180606	0.087675
Fibrobacteres (Bacteria)	100	0.0144747	7.13656e-06	0.147069
Planctomycetes (Bacteria)	100	0.0132957	0.000487315	0.299359
Chloroflexi (Bacteria)	100	0.00968184	1.42731e-05	0.122309
Aquificae (Bacteria)	96.7279	0.00793701	0	0.475207
Deinococcus-Thermus (Bacteria)	100	0.00724367	0.000170651	0.0622605
Nitrospirae (Bacteria)	100	0.00655082	0.0001901	0.175095
Armatimonadetes (Bacteria)	99.9601	0.00639286	0	0.161932
Chlorobi (Bacteria)	99.9202	0.00519274	0	0.0295988
Thermotogae (Bacteria)	99.9601	0.00436889	0	0.10676
Gemmatimonadetes (Bacteria)	100	0.00379901	0.000268325	0.0354386
Apicomplexa (Eukaryota)	100	0.00339229	0.000121075	0.0207722
Candidatus Rokubacteria (Bacteria)	100	0.00317195	0.000149564	0.04711
Ignavibacteriae (Bacteria)	99.5211	0.00260496	0	0.176228
Rhodophyta (Eukaryota)	100	0.0017222	5.12042e-06	0.00990423
Candidatus Shapirobacteria (Bacteria)	72.5858	0.00165252	0	0.108756
Candidatus Omnitrophica (Bacteria)	99.8803	0.00156399	0	0.0280043
Unclassified (Archaea)	100	0.00140917	7.49715e-06	0.0779472
Nitrospinae (Bacteria)	99.8803	0.0013203	0	0.0285933
Candidatus Uhrbacteria (Bacteria)	89.9042	0.00131766	0	0.0450011
Candidatus Magasanikbacteria (Bacteria)	96.8476	0.00120456	0	0.14009
Candidatus Margulisbacteria (Bacteria)	99.7207	0.00120159	0	0.23442
Candidatus Parcubacteria (Bacteria)	82.921	0.00118283	0	0.0859666
Candidatus Woesebacteria (Bacteria)	97.2466	0.00111416	0	0.0408004
Candidatus Moranbacteria (Bacteria)	80.2474	0.00107112	0	0.0676016
Candidatus Handelsmanbacteria (Bacteria)	96.6081	0.00101056	0	0.012927
Chordata (Eukaryota)	99.9202	0.000988481	0	0.0750142
Candidatus Atribacteria (Bacteria)	94.8125	0.000957123	0	0.144393
Chytridiomycota (Eukaryota)	95.411	0.000889819	0	0.0218578
Basidiomycota (Eukaryota)	99.4014	0.000743306	0	0.0387048
Candidatus Aminicenantes (Bacteria)	94.8125	0.000656819	0	0.0234509
Chlorophyta (Eukaryota)	100	0.000620531	1.48194e-05	0.0458819
Candidatus Peregrinibacteria (Bacteria)	83.1205	0.000598002	0	0.0172229
Candidatus Heimdallarchaeota (Archaea)	99.8803	0.000595711	0	0.0168249
Candidatus Desantisbacteria (Bacteria)	87.4302	0.000570202	0	0.00779743
Candidatus Cloacimonetes (Bacteria)	86.0335	0.000566515	0	0.0599747
Crenarchaeota (Archaea)	99.4413	0.000539459	0	0.0149024
Candidatus Bathyarchaeota (Archaea)	93.8947	0.000527194	0	0.073745
candidate division WWE3 (Bacteria)	97.8851	0.000489029	0	0.00753281
Balneolaeota (Bacteria)	69.7526	0.000471415	0	0.0304087
Kiritimatiellaeota (Bacteria)	68.8747	0.000445027	0	0.0797633
Candidatus Wolfebacteria (Bacteria)	80.7662	0.000442117	0	0.287408
Deferribacteres (Bacteria)	67.3982	0.000434028	0	0.0182601
Dictyoglomi (Bacteria)	95.0519	0.000413135	0	0.0124282
Candidatus Kryptonia (Bacteria)	86.4326	0.000386899	0	0.0636982
Candidatus Saccharibacteria (Bacteria)	75.4589	0.000380748	0	0.0179013
Candidatus Falkowbacteria (Bacteria)	69.3136	0.000377522	0	0.0239473
Candidatus Gracilibacteria (Bacteria)	50.7981	0.000353327	0	0.0723796
Candidatus Berkelbacteria (Bacteria)	67.6776	0.000342802	0	0.0232935
Candidatus Gottesmanbacteria (Bacteria)	51.3966	0.000325799	0	0.0407654
Candidatus Nealsonbacteria (Bacteria)	56.7438	0.000321252	0	0.0237778
Candidatus Kerfeldbacteria (Bacteria)	99.4812	0.000319367	0	0.00722615
Bacillariophyta (Eukaryota)	67.2785	0.000306459	0	0.0584427
candidate division Zixibacteria (Bacteria)	76.1373	0.000305676	0	0.0261601
Candidatus Woesearchaeota (Archaea)	59.0583	0.000297919	0	0.0138641
candidate division NC10 (Bacteria)	96.8875	0.000292155	0	0.0127279
Candidatus Pacebacteria (Bacteria)	66.68	0.000285845	0	0.0249785
Candidatus Cryosericota (Bacteria)	91.7398	0.000280884	0	0.0104512
Candidatus Kaiserbacteria (Bacteria)	63.0886	0.000269088	0	0.0634108
Candidatus Thorarchaeota (Archaea)	49.0822	0.000264839	0	0.0491447
Candidatus Nomurabacteria (Bacteria)	83.4397	0.00026445	0	0.0172489
Mucoromycota (Eukaryota)	92.7374	0.000262045	0	0.0378664
Candidatus Yanofskybacteria (Bacteria)	47.6057	0.000247119	0	0.0209036
Candidatus Zambryskibacteria (Bacteria)	33.1604	0.000217445	0	0.0123814
Thaumarchaeota (Archaea)	89.5451	0.000214375	0	0.0150149
Candidatus Roizmanbacteria (Bacteria)	55.9058	0.000214331	0	0.0218479
Candidatus Schekmanbacteria (Bacteria)	39.7845	0.000211163	0	0.0152675
Candidatus Tectomicrobia (Bacteria)	98.1644	0.000207937	0	0.0102407
Cnidaria (Eukaryota)	95.4908	0.000206172	0	0.0136632
Candidatus Firestonebacteria (Bacteria)	59.8962	0.000205557	0	0.00897425
Candidatus Abyssubacteria (Bacteria)	54.15	0.000190923	0	0.0270775
Candidatus Staskawiczbacteria (Bacteria)	43.9346	0.000181452	0	0.0108424
Candidatus Microgenomates (Bacteria)	30.5666	0.000178537	0	0.017995
Microsporidia (Eukaryota)	96.0495	0.000172327	0	0.00679957
Candidatus Giovannonibacteria (Bacteria)	39.4254	0.000171759	0	0.0508496
Candidatus Curtissbacteria (Bacteria)	82.7215	0.00017018	0	0.00483522
Candidatus Harrisonbacteria (Bacteria)	23.1844	0.000166448	0	0.0146359
Candidatus Wallbacteria (Bacteria)	49.4014	0.000160013	0	0.0247598
Porifera (Eukaryota)	29.2897	0.000149808	0	0.0174959
Candidatus Sumerlaeota (Bacteria)	78.731	0.000149602	0	0.00286504
Candidatus Goldbacteria (Bacteria)	36.1532	0.000148927	0	0.0288952
Calditrichaeota (Bacteria)	47.6856	0.000139821	0	0.0157811
Candidatus Riflebacteria (Bacteria)	53.1524	0.000139034	0	0.0333781
Thermodesulfobacteria (Bacteria)	79.8484	0.000127353	0	0.00672919
Candidatus Daviesbacteria (Bacteria)	26.9354	0.000126428	0	0.0168443
Zoopagomycota (Eukaryota)	86.0335	0.000124195	0	0.00874336
Candidatus Raymondbacteria (Bacteria)	59.0184	0.000123052	0	0.00709675
Candidatus Fermentibacteria (Bacteria)	68.8747	0.000112276	0	0.00756855
Candidatus Marinimicrobia (Bacteria)	39.6648	9.98477e-05	0	0.00627831
Candidatus Latescibacteria (Bacteria)	68.4358	9.9064e-05	0	0.00374388
Candidatus Wildermuthbacteria (Bacteria)	35.0758	9.6219e-05	0	0.0101824
Candidatus Hydrogenedentes (Bacteria)	41.1413	9.35618e-05	0	0.00643425
Candidatus Azambacteria (Bacteria)	67.3184	9.1139e-05	0	0.00478241
Rhodothermaeota (Bacteria)	40.9417	8.65868e-05	0	0.0272264
Mollusca (Eukaryota)	32.4421	8.57721e-05	0	0.016733
Candidatus Glassbacteria (Bacteria)	50.2793	7.707e-05	0	0.00530667
Caldiserica (Bacteria)	21.1492	6.868e-05	0	0.0219947
Candidatus Buchananbacteria (Bacteria)	19.154	6.6811e-05	0	0.0292019
Candidatus Levybacteria (Bacteria)	37.6696	6.60974e-05	0	0.00833678
Candidatus Fischerbacteria (Bacteria)	31.8436	6.4522e-05	0	0.00298955
Candidatus Colwellbacteria (Bacteria)	22.3065	6.27504e-05	0	0.00348879
candidate division CPR2 (Bacteria)	76.7358	5.96949e-05	0	0.00673579
Cryptomycota (Eukaryota)	24.1421	5.95905e-05	0	0.00903311
Candidatus Micrarchaeota (Archaea)	13.3679	5.81681e-05	0	0.0139803
Candidatus Kuenenbacteria (Bacteria)	51.3567	5.73024e-05	0	0.00377173
Candidatus Collierbacteria (Bacteria)	26.1772	5.69472e-05	0	0.0113464
Candidatus Marsarchaeota (Archaea)	7.82123	5.35099e-05	0	0.0113537
candidate division KD3-62 (Bacteria)	33.9186	5.30806e-05	0	0.0127934
Platyhelminthes (Eukaryota)	28.9705	5.02319e-05	0	0.0102866
Candidatus Liptonbacteria (Bacteria)	7.5419	4.95939e-05	0	0.0108272
Candidatus Portnoybacteria (Bacteria)	24.7805	4.79335e-05	0	0.0165795
Candidatus Lokiarchaeota (Archaea)	60.814	4.78235e-05	0	0.0211041
Candidatus Bipolaricaulota (Bacteria)	39.0263	4.5446e-05	0	0.0019377
Candidatus Taylorbacteria (Bacteria)	11.7318	4.36692e-05	0	0.00893386
Candidatus Amesbacteria (Bacteria)	18.9545	4.13901e-05	0	0.00318214
Candidatus Sungbacteria (Bacteria)	2.47406	4.03423e-05	0	0.0242708
Candidatus Delongbacteria (Bacteria)	15.7622	3.78329e-05	0	0.0150732
Candidatus Ryanbacteria (Bacteria)	17.7175	3.71051e-05	0	0.00679167
Candidatus Doudnabacteria (Bacteria)	59.5371	3.3564e-05	0	0.0074163
Coprothermobacterota (Bacteria)	69.4733	3.32744e-05	0	0.000981309
Candidatus Beckwithbacteria (Bacteria)	18.4358	3.20428e-05	0	0.00482183
Candidatus Dadabacteria (Bacteria)	14.6449	3.20339e-05	0	0.00944174
Abditibacteriota (Bacteria)	38.7071	3.18523e-05	0	0.00241502
Candidatus Komeilibacteria (Bacteria)	10.814	3.08524e-05	0	0.00649095
candidate division WOR-3 (Bacteria)	11.2929	3.06011e-05	0	0.00688512
Candidatus Eisenbacteria (Bacteria)	20.6305	2.95996e-05	0	0.00284348
Chrysiogenetes (Bacteria)	35.7941	2.79202e-05	0	0.00145871
Hemichordata (Eukaryota)	67.3982	2.67178e-05	0	0.00143727
Candidatus Aureabacteria (Bacteria)	33.7989	2.49236e-05	0	0.000800395
Brachiopoda (Eukaryota)	6.50439	2.29546e-05	0	0.00534728
Candidatus Edwardsbacteria (Bacteria)	37.6696	2.28951e-05	0	0.00429481
Blastocladiomycota (Eukaryota)	33.0806	2.28673e-05	0	0.00396169
Candidatus Vogelbacteria (Bacteria)	28.1724	2.2065e-05	0	0.00462717
Candidatus Diapherotrites (Archaea)	4.58899	2.12573e-05	0	0.0139755
Candidatus Aenigmarchaeota (Archaea)	11.4126	2.09082e-05	0	0.00271178
Candidatus Blackburnbacteria (Bacteria)	6.38468	2.0633e-05	0	0.00349074
Candidatus Jorgensenbacteria (Bacteria)	16.5204	1.6768e-05	0	0.00237879
Candidatus Yonathbacteria (Bacteria)	6.30487	1.60215e-05	0	0.00684159
candidate division AD3 (Bacteria)	38.9465	1.48514e-05	0	0.00425844
Chromerida (Eukaryota)	6.86353	1.0862e-05	0	0.00311407
Candidatus Woykebacteria (Bacteria)	5.54669	1.04043e-05	0	0.00726067
Annelida (Eukaryota)	19.3935	1.01095e-05	0	0.00422126
Cryptophyta (Eukaryota)	19.7526	9.79873e-06	0	0.00399855
Candidatus Lloydbacteria (Bacteria)	13.0886	9.62684e-06	0	0.00294401
Candidatus Campbellbacteria (Bacteria)	3.23224	9.25578e-06	0	0.002546
Echinodermata (Eukaryota)	2.51397	7.70522e-06	0	0.00400583
Candidatus Spechtbacteria (Bacteria)	7.86113	7.67995e-06	0	0.0019885
Candidatus Abawacabacteria (Bacteria)	9.73663	7.40536e-06	0	0.0020359
Candidatus Korarchaeota (Archaea)	3.99042	7.20583e-06	0	0.00707769
Nanoarchaeota (Archaea)	2.63368	5.5937e-06	0	0.00166146
candidate division WPS-2 (Bacteria)	26.9753	5.47624e-06	0	0.00013205
Candidatus Tagabacteria (Bacteria)	3.83081	5.11999e-06	0	0.00200753
Candidatus Chisholmbacteria (Bacteria)	6.94334	5.03725e-06	0	0.0012023
Tardigrada (Eukaryota)	9.37749	4.82131e-06	0	0.000976603
Candidatus Niyogibacteria (Bacteria)	2.27454	4.68713e-06	0	0.00164158
Candidatus Coatesbacteria (Bacteria)	7.502	4.43242e-06	0	0.0004652
Priapulida (Eukaryota)	6.70391	4.25983e-06	0	0.00245993
Candidatus Brennerbacteria (Bacteria)	10.4549	4.11613e-06	0	0.00122057
candidate division CPR3 (Bacteria)	11.5323	3.86417e-06	0	0.00162272
Candidatus Fraserbacteria (Bacteria)	18.5156	3.48819e-06	0	0.000440206
Candidatus Wirthbacteria (Bacteria)	1.47646	2.87867e-06	0	0.00192687
Candidatus Kapabacteria (Bacteria)	5.98563	2.52226e-06	0	0.000332352
Candidatus Terrybacteria (Bacteria)	0.75818	1.96647e-06	0	0.00145736
Placozoa (Eukaryota)	1.8755	1.19499e-06	0	0.000423809
candidate division CPR1 (Bacteria)	7.22267	1.01333e-06	0	0.000128005
Candidatus Lindowbacteria (Bacteria)	0.399042	6.23948e-07	0	0.000646149
Candidatus Cerribacteria (Bacteria)	0.399042	1.69999e-07	0	0.00013737

## Sheet: Core_summary_statistics
genus_print	Prevalence	Prevalence at 0.1 Percent Detection (%)	Mean Relative Abundance (%)	Proportion of samples the genus is most dominant in (%)
Bacteroides (Bacteria)	100	100	29.6578	60.2554
Prevotella (Bacteria)	100	100	15.7926	27.6137
Clostridium (Bacteria)	100	100	6.8266	6.74381
Alistipes (Bacteria)	100	99.9601	6.22684	2.63368
Parabacteroides (Bacteria)	100	99.9601	1.90657	0.0399042
Blautia (Bacteria)	100	99.601	0.671858	0
Ruminococcus (Bacteria)	100	99.4014	2.58739	0.119713
Roseburia (Bacteria)	100	99.3615	1.82828	0.0399042
Faecalibacterium (Bacteria)	100	99.162	2.42002	0.199521
Eubacterium (Bacteria)	100	99.0423	2.23104	0
Oscillibacter (Bacteria)	100	98.8029	0.831475	0.0798085
Flavonifractor (Bacteria)	100	98.0846	0.513262	0
Pseudomonas (Bacteria)	100	98.0447	0.20201	0
Dorea (Bacteria)	100	96.3687	0.269706	0
Klebsiella (Bacteria)	100	95.5706	0.428374	0
Odoribacter (Bacteria)	100	95.2913	0.860693	0.0798085
Chlamydia (Bacteria)	100	92.7773	0.404333	0.0399042
Collinsella (Bacteria)	100	89.7446	0.250889	0
Paenibacillus (Bacteria)	100	86.9513	0.211064	0
Coprococcus (Bacteria)	100	84.7167	0.401028	0
Subdoligranulum (Bacteria)	100	84.5172	0.488019	0
Butyricimonas (Bacteria)	100	78.9306	0.341529	0
Clostridioides (Bacteria)	100	77.5738	0.168443	0
Sutterella (Bacteria)	100	76.7358	0.725692	0
Bifidobacterium (Bacteria)	100	73.2642	0.281543	0
Paraprevotella (Bacteria)	100	71.4286	0.563338	0
Lachnoclostridium (Bacteria)	100	70.1915	0.148851	0
Burkholderia (Bacteria)	100	68.6752	0.125453	0
Butyricicoccus (Bacteria)	100	65.1636	0.139151	0
Anaerotruncus (Bacteria)	100	60.9737	0.258478	0
Phascolarctobacterium (Bacteria)	100	60.4549	0.442832	0
Eggerthella (Bacteria)	100	57.6217	0.116562	0
Bordetella (Bacteria)	100	51.5563	0.105119	0
Azospirillum (Bacteria)	100	50	0.73995	0.0399042
Akkermansia (Bacteria)	100	47.8851	0.415957	0
Barnesiella (Bacteria)	99.9601	46.8875	0.14004	0
Tannerella (Bacteria)	99.9601	46.4884	0.114484	0
Dialister (Bacteria)	100	44.9322	0.290396	0
Bilophila (Bacteria)	99.9202	44.3336	0.137109	0
Catenibacterium (Bacteria)	100	39.0662	0.13384	0
Streptococcus (Bacteria)	100	37.2706	0.121656	0
Streptomyces (Bacteria)	100	33.759	0.0875979	0
Mycoplasma (Bacteria)	100	30.407	0.171648	0
Butyrivibrio (Bacteria)	100	29.6089	0.611397	0.27933
Lachnospira (Bacteria)	100	29.0902	0.0928079	0
Acidiphilium (Bacteria)	99.9202	26.0974	0.127952	0
Blastocystis (Eukaryota)	100	25.7382	0.223546	0
Veillonella (Bacteria)	100	25.7382	0.110985	0
Gemmiger (Bacteria)	100	25.2195	0.08413	0
Staphylococcus (Bacteria)	100	24.7805	0.241048	0
Intestinimonas (Bacteria)	100	24.581	0.0779002	0
Desulfovibrio (Bacteria)	100	23.6233	0.0753009	0
Duodenibacillus (Bacteria)	99.8803	23.2243	0.146508	0
Coprobacillus (Bacteria)	100	22.7055	0.135891	0
Acetobacter (Bacteria)	100	21.7478	0.351472	0.0399042
Victivallis (Bacteria)	99.8404	19.8723	0.0762	0
Sk1virus (Viruses)	99.8404	19.1141	0.0924346	0
Haemophilus (Bacteria)	100	18.9545	0.089668	0
Coraliomargarita (Bacteria)	99.8803	17.9569	0.0871645	0
Escherichia (Bacteria)	100	17.1987	0.157778	0
Pseudoflavonifractor (Bacteria)	100	17.0391	0.0667845	0
Prevotellamassilia (Bacteria)	100	16.7598	0.0743201	0
Acholeplasma (Bacteria)	99.9601	15.6425	0.103038	0
Parasutterella (Bacteria)	100	15.6425	0.0607572	0
Bacillus (Bacteria)	100	15.4429	0.0643341	0
Acinetobacter (Bacteria)	100	15.004	0.0879432	0
Holdemanella (Bacteria)	100	15.004	0.0518734	0
Angelakisella (Bacteria)	100	12.6097	0.0449751	0
Corallococcus (Bacteria)	100	12.4501	0.0643454	0
Acidaminococcus (Bacteria)	100	12.4102	0.0691018	0
Chitinophaga (Bacteria)	99.601	11.7717	0.0551793	0
Fusobacterium (Bacteria)	100	11.6121	0.114012	0
