# Supplementary material for: Gut metagenome associations with extensive digital health data in a volunteer-based Estonian microbiome cohort
Source: Nat Commun. 2022 Feb 15;13:869. doi: 10.1038/s41467-022-28464-9 (PMC8847343; doi:10.1038/s41467-022-28464-9)
Supplement: Supplementary file 6 — Dataset 3 [file 41467_2022_28464_MOESM6_ESM.xlsx]

## Sheet: AlphaDiv_species
Metric	factor_group	factor_name	estimate	p.value	FDR
Observed	Intrinsic	Body mass index	-0.150937	3.17131e-14	7.86485e-12
Observed	Intrinsic	Waist to hip ratio	-0.132868	2.5178e-11	2.08138e-09
Observed	Intrinsic	Blood pressure (systolic)	-0.0949659	2.2459e-06	6.9623e-05
Observed	Intrinsic	Gender (M0F1)	0.0663675	0.000886212	0.00910971
Observed	Intrinsic	Age	0.0267714	0.181902	0.402783
Observed	Dietary	Fresh fruit, berries	0.0819463	4.00674e-05	0.000621045
Observed	Dietary	Fresh vegetables	0.0699473	0.000458141	0.00568095
Observed	Dietary	Soft drinks	-0.06592	0.000960328	0.00916005
Observed	Dietary	Adds salt	0.0581643	0.00358302	0.0261386
Observed	Dietary	Coffee	0.0493164	0.0135474	0.0799939
Observed	Dietary	Porridge, muesli	0.0489229	0.0143125	0.0825463
Observed	Dietary	Meat products (wieners, sausages)	-0.0480538	0.0161389	0.0870096
Observed	Dietary	Is Vegan (N0Y1)	-0.047627	0.0171083	0.0881602
Observed	Dietary	Sweets	0.0419466	0.0357535	0.136413
Observed	Dietary	Potatoes	-0.0400702	0.0448867	0.161332
Observed	Dietary	Whitebread	-0.039444	0.0483419	0.168856
Observed	Dietary	Boiled vegetables	0.0382561	0.0555122	0.186041
Observed	Dietary	Fish	0.0275159	0.168507	0.390559
Observed	Dietary	Eggs	0.025359	0.204425	0.433312
Observed	Dietary	Bread	0.0251412	0.208342	0.434192
Observed	Dietary	Dairy	0.0199393	0.318394	0.568121
Observed	Dietary	Tea	-0.01879	0.347094	0.579541
Observed	Dietary	Meat	-0.0191461	0.338031	0.579541
Observed	Dietary	Rice, pasta	-0.016835	0.399566	0.643298
Observed	Dietary	Compote, jams	0.00719735	0.718754	0.895734
Observed	Dietary	Eating habit	#N/A	#N/A	#N/A
Observed	Diseases	Essential (primary) hypertension (I10)	-0.117543	3.59702e-09	1.78412e-07
Observed	Diseases	Gout (M10)	-0.111126	2.44026e-08	1.00864e-06
Observed	Diseases	Hypertensive heart disease (I11)	-0.103056	2.33851e-07	8.28499e-06
Observed	Diseases	Acute bronchitis (J20)	-0.0931767	2.979e-06	8.03558e-05
Observed	Diseases	Irritable bowel syndrome (K58)	-0.0928335	3.24015e-06	8.03558e-05
Observed	Diseases	Other anxiety disorders (F41)	-0.091879	4.08692e-06	9.21414e-05
Observed	Diseases	Type 2 diabetes mellitus (E11)	-0.0857049	1.73789e-05	0.000307855
Observed	Diseases	Self reported mental health status OK (N0Y1)	0.0827305	3.37554e-05	0.00055809
Observed	Diseases	Asthma (J45)	-0.0763333	0.000130817	0.00180237
Observed	Diseases	Gastro-esophageal reflux disease (K21)	-0.0751462	0.000166373	0.00217161
Observed	Diseases	Disorders of lipoprotein metabolism and other lipidemias (E78)	-0.0680075	0.000657539	0.00776523
Observed	Diseases	Self reported physical health status OK (N0Y1)	0.0670637	0.000781362	0.00880808
Observed	Diseases	Crohn's disease [regional enteritis] (K50)	-0.0661695	0.000918317	0.00910971
Observed	Diseases	Cholelithiasis (K80)	-0.0647033	0.00119184	0.0109473
Observed	Diseases	Gastritis and duodenitis (K29)	-0.0628157	0.00165469	0.0141505
Observed	Diseases	Major depressive disorder, single episode (F32)	-0.0590813	0.00308923	0.0247139
Observed	Diseases	Acute appendicitis (K35)	-0.0581634	0.00358352	0.0261386
Observed	Diseases	Calculus of kidney and ureter (N20)	-0.0582238	0.00354891	0.0261386
Observed	Diseases	Major depressive disorder, recurrent (F33)	-0.0554809	0.00546734	0.0356816
Observed	Diseases	Iron deficiency anemia (D50)	0.0510879	0.0105321	0.0637066
Observed	Diseases	Chronic diseases of tonsils and adenoids (J35)	-0.0483052	0.0155905	0.085921
Observed	Diseases	Ulcerative colitis (K51)	-0.0471998	0.0181297	0.0881602
Observed	Diseases	Acute tubulo-interstitial nephritis (N10)	-0.044861	0.02472	0.109474
Observed	Diseases	Eating disorders (F50)	-0.0429771	0.0314482	0.125793
Observed	Diseases	Haemorrhoids (I84)	-0.0432035	0.0305646	0.125793
Observed	Diseases	Female genital prolapse (N81)	-0.0434617	0.0295825	0.125793
Observed	Diseases	Vasomotor and allergic rhinitis (J30)	-0.0422547	0.0344165	0.133364
Observed	Diseases	Epilepsy and recurrent seizures (G40)	-0.041806	0.0363778	0.136692
Observed	Diseases	Malignant neoplasm of colon (C18)	-0.0355966	0.074808	0.226248
Observed	Diseases	Parkinson's disease (G20)	0.0357786	0.0733327	0.226248
Observed	Diseases	Other cardiac arrhythmias (I49)	-0.0351221	0.0787686	0.232555
Observed	Diseases	Candidiasis (B37)	0.0341109	0.087778	0.249068
Observed	Diseases	Bipolar disorder (F31)	-0.0340465	0.0883791	0.249068
Observed	Diseases	Chronic viral hepatitis (B18)	-0.0326225	0.102532	0.276091
Observed	Diseases	Polyosteoarthritis (M15)	-0.032819	0.100478	0.276091
Observed	Diseases	Chronic kidney disease (CKD) (N18)	-0.0328597	0.100057	0.276091
Observed	Diseases	Chronic rhinitis, nasopharyngitis and pharyngitis (J31)	-0.0319357	0.109974	0.28709
Observed	Diseases	Other and unsp noninfective gastroenteritis and colitis (K52)	-0.0301286	0.131599	0.323134
Observed	Diseases	Chronic tubulo-interstitial nephritis (N11)	-0.0275519	0.16795	0.390559
Observed	Diseases	Has had chickenpox (N0Y1)	0.0269268	0.178157	0.398046
Observed	Diseases	Atrial fibrillation and flutter (I48)	-0.0252316	0.206711	0.434192
Observed	Diseases	Heart failure (I50)	-0.0247859	0.214844	0.440342
Observed	Diseases	Endometriosis (N80)	-0.0229365	0.251059	0.498101
Observed	Diseases	Acne (L70)	-0.0221995	0.266615	0.520635
Observed	Diseases	Migraine (G43)	-0.0220405	0.270058	0.523238
Observed	Diseases	Vitamin B12 deficiency anemia (D51)	-0.0205267	0.304344	0.565855
Observed	Diseases	Psoriasis (L40)	-0.0200466	0.315797	0.568121
Observed	Diseases	Age-related cataract (H25)	-0.0188694	0.345061	0.579541
Observed	Diseases	Menopausal and other perimenopausal disorders (N95)	-0.019281	0.334637	0.579541
Observed	Diseases	Chronic ischemic heart disease (I25)	-0.0171482	0.390853	0.637707
Observed	Diseases	Gastric ulcer (K25)	-0.016746	0.402061	0.643298
Observed	Diseases	Osteoporosis without current pathological fracture (M81)	-0.0168003	0.400536	0.643298
Observed	Diseases	Ovarian dysfunction (E28)	0.0151305	0.448993	0.691616
Observed	Diseases	Vitamin D deficiency (E55)	-0.0142147	0.476918	0.725618
Observed	Diseases	Schizophrenia (F20)	-0.0134175	0.501982	0.74817
Observed	Diseases	Rheumatoid arthritis with rheumatoid factor (M05)	-0.0131719	0.509842	0.74817
Observed	Diseases	Acute tonsillitis (J03)	-0.0119353	0.55037	0.793557
Observed	Diseases	Type 1 diabetes mellitus (E10)	-0.0110936	0.578836	0.825007
Observed	Diseases	Benign neoplasm of colon, rectum, anus and anal canal (D12)	-0.00944614	0.636464	0.857843
Observed	Diseases	Osteoporosis with current pathological fracture (M80)	-0.00924451	0.643681	0.86288
Observed	Diseases	Other arthritis (M13)	-0.00901301	0.652008	0.864695
Observed	Diseases	Other rheumatoid arthritis (M06)	-0.00657471	0.742179	0.908089
Observed	Diseases	Atopic dermatitis (L20)	-0.00632938	0.751476	0.913559
Observed	Diseases	Has seasonable allergy (N0Y1)	-0.00618299	0.757276	0.916119
Observed	Diseases	Benign neoplasm of mouth and pharynx (D10)	-0.00555599	0.781016	0.921122
Observed	Diseases	Glaucoma (H40)	0.00590555	0.767622	0.921122
Observed	Diseases	Lactose intolerance (E73)	0.00510136	0.798531	0.932071
Observed	Diseases	Atherosclerosis (I70)	0.00477513	0.811164	0.932071
Observed	Diseases	Female infertility (N97)	0.00350385	0.860832	0.941392
Observed	Diseases	Acute pharyngitis (J02)	-0.00275985	0.89017	0.950397
Observed	Diseases	Has been diagnosed with gum disease (N0Y1)	0.00124529	0.950357	0.986145
Observed	Medications	Antibiotics usage history (last 10 years)	-0.152054	6.13354e-12	7.60559e-10
Observed	Medications	Metoprolol (C07AB02)	-0.0634515	0.00148296	0.0131348
Observed	Medications	Antidepressants usage history (last 10 years)	-0.0594207	0.00466184	0.0323014
Observed	Medications	Glucocorticoids (H02AB)	-0.056137	0.0049383	0.0331
Observed	Medications	Gabapentin (N03AX12)	-0.0539515	0.00690423	0.0439038
Observed	Medications	Nebivolol (C07AB12)	-0.0528094	0.00818932	0.0507738
Observed	Medications	Tramadol (N02AX02)	-0.0485252	0.0151243	0.0852462
Observed	Medications	Influenza, inactivated, split virus or surface antigen (J07BB02)	0.0475758	0.0172281	0.0881602
Observed	Medications	Telmisartan+amlodipine (C09DB04)	-0.0474373	0.0175555	0.0881602
Observed	Medications	Dopaminergic agents (N04B)	0.0468278	0.0190622	0.0894677
Observed	Medications	Naproxen+esomeprazole (M01AE52)	-0.0468052	0.0191201	0.0894677
Observed	Medications	Simvastatin (C10AA01)	0.0456865	0.0221888	0.101904
Observed	Medications	Trimetazidine (C01EB15)	-0.0453062	0.0233255	0.105177
Observed	Medications	Vitamin b12 and folic acid (B03B)	-0.0431263	0.0308633	0.125793
Observed	Medications	Venlafaxine (N06AX16)	-0.040124	0.0445994	0.161332
Observed	Medications	Dihydropyridine derivatives (C08CA)	-0.0398847	0.0458879	0.162574
Observed	Medications	Levothyroxine sodium (H03AA01)	0.0390346	0.0507198	0.174702
Observed	Medications	Telmisartan (C09CA07)	-0.0384642	0.0541956	0.184116
Observed	Medications	Aminosalicylic acid and similar agents (A07EC)	-0.0377398	0.0588943	0.194744
Observed	Medications	Tamsulosin+dutasteride (G04CA52)	0.0372945	0.0619463	0.202141
Observed	Medications	Drugs for urinary frequency and incontinence (G04BD)	0.0371596	0.0628968	0.202577
Observed	Medications	Quetiapine (N05AH04)	-0.036325	0.0690459	0.216752
Observed	Medications	Antiinflammatory and antirheumatic products, non-steroids (M01A)	0.0363743	0.0686689	0.216752
Observed	Medications	Telmisartan+hydrochlorothiazide (C09DA07)	-0.0356277	0.0745538	0.226248
Observed	Medications	Imidazole derivatives (G01AF)	0.0351489	0.0785408	0.232555
Observed	Medications	Mometasone (R01AD09)	0.0348938	0.0807341	0.235554
Observed	Medications	Antithrombotic agents (B01A)	0.0346325	0.0830322	0.239442
Observed	Medications	Alprazolam (N05BA12)	-0.0324233	0.104648	0.276091
Observed	Medications	Antiepileptics (N03A)	-0.0326008	0.102761	0.276091
Observed	Medications	Dienogest+ethinylestradiol (G03AA16)	-0.0324835	0.104005	0.276091
Observed	Medications	Gonadotropins and other ovulation stimulants (G03G)	0.0314898	0.11503	0.297162
Observed	Medications	Metformin (A10BA02)	-0.0308378	0.122749	0.313833
Observed	Medications	Insulins and analogues for injection, long-acting (A10AE)	-0.0304704	0.127274	0.318827
Observed	Medications	Other immunosuppressants (L04AX)	-0.0305492	0.126293	0.318827
Observed	Medications	Adrenergics, inhalants (R03A)	-0.0301519	0.1313	0.323134
Observed	Medications	Omeprazole (A02BC01)	-0.0293626	0.141704	0.344535
Observed	Medications	Warfarin (B01AA03)	-0.0291597	0.144478	0.347869
Observed	Medications	Rivaroxaban (B01AF01)	-0.0287822	0.14975	0.357095
Observed	Medications	Direct acting antivirals (J05A)	0.0283351	0.156182	0.368886
Observed	Medications	Esomeprazole (A02BC05)	-0.0273435	0.17119	0.393103
Observed	Medications	Allopurinol (M04AA01)	-0.0272389	0.172835	0.39324
Observed	Medications	Tamsulosin (G04CA02)	0.0270195	0.176322	0.397527
Observed	Medications	Non-selective monoamine reuptake inhibitors (N06AA)	-0.0263795	0.186792	0.409951
Observed	Medications	Candesartan (C09CA06)	-0.0260954	0.191585	0.413156
Observed	Medications	Latanoprost (S01EE01)	0.0261902	0.189976	0.413156
Observed	Medications	Antibiotics (S01AA)	-0.0256104	0.199973	0.427529
Observed	Medications	Organic nitrates (C01DA)	-0.0238514	0.232645	0.472918
Observed	Medications	Gestodene+ethinylestradiol (G03AA10)	-0.0234843	0.239915	0.483731
Observed	Medications	Escitalopram (N06AB10)	-0.0232087	0.245479	0.490957
Observed	Medications	Pantoprazole (A02BC02)	0.0211844	0.289107	0.543969
Observed	Medications	Indapamide (C03BA11)	-0.0211658	0.289532	0.543969
Observed	Medications	Duloxetine (N06AX21)	-0.0213495	0.285366	0.543969
Observed	Medications	Angiotensin ii antagonists and diuretics (C09DA)	-0.0213629	0.285064	0.543969
Observed	Medications	Beta blocking agents (C07A)	0.0204413	0.306361	0.565855
Observed	Medications	Progestogens and estrogens, fixed combinations (G03AA)	0.0203711	0.308026	0.565855
Observed	Medications	Etoricoxib (M01AH05)	-0.0201201	0.314026	0.568121
Observed	Medications	Torasemide (C03CA04)	-0.0199382	0.318423	0.568121
Observed	Medications	Encephalitis, tick borne, inactivated, whole virus (J07BA01)	-0.0198061	0.321639	0.569761
Observed	Medications	Pseudoephedrine+cetirizine (R01BA93)	-0.0190001	0.341729	0.579541
Observed	Medications	Zopiclone (N05CF01)	-0.0187701	0.347604	0.579541
Observed	Medications	Alendronic acid+colecalciferol (M05BB03)	0.0187473	0.348192	0.579541
Observed	Medications	Estradiol (G03CA03)	0.0191795	0.337188	0.579541
Observed	Medications	Betahistine (N07CA01)	0.019142	0.338134	0.579541
Observed	Medications	Lornoxicam (M01AC05)	0.0179106	0.370132	0.611952
Observed	Medications	Mebeverine (A03AA04)	-0.0175211	0.38063	0.625141
Observed	Medications	Benzodiazepine derivatives (N05BA)	-0.0164837	0.409475	0.65096
Observed	Medications	Glucosamine (M01AX05)	0.0162359	0.416551	0.657992
Observed	Medications	Dexamethasone+tobramycin (S01CA81)	-0.0160161	0.42289	0.663777
Observed	Medications	Lipase+amylase+protease (A09AA02)	-0.0158537	0.427608	0.666961
Observed	Medications	Selective serotonin reuptake inhibitors (N06AB)	-0.0156535	0.433469	0.671877
Observed	Medications	Agomelatine (N06AX22)	-0.0144942	0.468294	0.716895
Observed	Medications	Other antidepressants (N06AX)	0.0136602	0.494278	0.747445
Observed	Medications	Fluticasone furoate (R01AD12)	0.0133012	0.505696	0.74817
Observed	Medications	Enalapril (C09AA02)	0.0133714	0.503453	0.74817
Observed	Medications	Perindopril (C09AA04)	0.0132611	0.506981	0.74817
Observed	Medications	Desogestrel (G03AC09)	0.01294	0.51732	0.754679
Observed	Medications	Angiotensin ii antagonists, plain (C09CA)	-0.0127434	0.523707	0.759528
Observed	Medications	Other dermatological preparations (D11A)	0.0111685	0.576274	0.825007
Observed	Medications	Fluocortolone+lidocaine (C05AA84)	0.01097	0.583075	0.826301
Observed	Medications	Blood glucose lowering drugs, excl. insulins (A10B)	-0.0103271	0.605343	0.843399
Observed	Medications	Alfuzosin (G04CA01)	-0.0103814	0.60345	0.843399
Observed	Medications	Sildenafil (G04BE03)	0.0104773	0.600107	0.843399
Observed	Medications	Apixaban (B01AF02)	-0.0101678	0.61092	0.846414
Observed	Medications	Isoconazole+diflucortolone (D01AC80)	0.0100435	0.615289	0.847731
Observed	Medications	Ramipril (C09AA05)	-0.00988883	0.620741	0.850519
Observed	Medications	Ace inhibitors and diuretics (C09BA)	0.00970414	0.627281	0.854756
Observed	Medications	Progestogens and estrogens, fixed combinations (G03FA)	0.00953251	0.633384	0.857843
Observed	Medications	Pregabalin (N03AX16)	-0.00910344	0.64875	0.864695
Observed	Medications	Tizanidine (M03BX02)	-0.0087343	0.66209	0.873396
Observed	Medications	Celecoxib (M01AH01)	-0.00813538	0.683964	0.883453
Observed	Medications	Vilanterol+fluticasone furoate (R03AK10)	-0.00826898	0.679061	0.883453
Observed	Medications	Zolpidem (N05CF02)	-0.00839366	0.674497	0.883453
Observed	Medications	Opioids (N02A)	-0.00797087	0.690019	0.88434
Observed	Medications	Cetirizine (R06AE07)	0.00779588	0.696483	0.88434
Observed	Medications	N02AJ06	0.0078483	0.694544	0.88434
Observed	Medications	Adrenergics in combination with corticosteroids or other drugs, excl. anticholinergics (R03AK)	-0.00727528	0.715841	0.895734
Observed	Medications	Amlodipine (C08CA01)	-0.00683007	0.732542	0.908089
Observed	Medications	Progestogens (G03D)	-0.00667562	0.738366	0.908089
Observed	Medications	Fluconazole (J02AC01)	0.00654469	0.743315	0.908089
Observed	Medications	Perindopril+indapamide (C09BA04)	-0.00571807	0.774797	0.921122
Observed	Medications	Other antihistamines for systemic use (R06AX)	-0.00549743	0.783265	0.921122
Observed	Medications	Corticosteroids, combinations with antiseptics (D07B)	0.0055947	0.779529	0.921122
Observed	Medications	Ibuprofen (M01AE01)	0.00548623	0.783696	0.921122
Observed	Medications	Mometasone (D07AC13)	0.00481784	0.809507	0.932071
Observed	Medications	Beta blocking agents (S01ED)	0.00479237	0.810495	0.932071
Observed	Medications	Bupropione (N06AX12)	0.00475864	0.811804	0.932071
Observed	Medications	Valaciclovir (J05AB11)	0.00464044	0.816394	0.933021
Observed	Medications	Propafenone (C01BC03)	-0.00399434	0.841592	0.941392
Observed	Medications	Lercanidipine (C08CA13)	0.00411568	0.836846	0.941392
Observed	Medications	Atorvastatin (C10AA05)	0.00359525	0.85724	0.941392
Observed	Medications	Diazepam (N05BA01)	-0.0037215	0.852284	0.941392
Observed	Medications	Betamethasone+fusidic acid (D07CC80)	0.00390503	0.845089	0.941392
Observed	Medications	Perindopril+amlodipine+indapamide (C09BX01)	-0.0039998	0.841378	0.941392
Observed	Medications	Meloxicam (M01AC06)	0.00377853	0.850046	0.941392
Observed	Medications	Timolol (S01ED01)	-0.00348233	0.861678	0.941392
Observed	Medications	Perindopril+amlodipine (C09BB04)	0.00384095	0.847599	0.941392
Observed	Medications	Rosuvastatin (C10AA07)	0.00292347	0.883704	0.950397
Observed	Medications	Dexamethasone+chloramphenicol (S01CA82)	0.00292979	0.883454	0.950397
Observed	Medications	Antiinfectives for treatment of acne (D10AF)	0.00279498	0.888781	0.950397
Observed	Medications	Formoterol+budesonide (R03AK07)	0.00302838	0.879561	0.950397
Observed	Medications	Levonorgestrel (G02BA03)	-0.0026905	0.892913	0.950397
Observed	Medications	Drospirenone+ethinylestradiol (G03AA12)	0.0025452	0.898664	0.95243
Observed	Medications	Sertraline (N06AB06)	0.00215468	0.914147	0.964716
Observed	Medications	Propranolol (C07AA05)	0.00173974	0.930633	0.977954
Observed	Medications	Antifungals for topical use (D01A)	-0.00144806	0.942241	0.981831
Observed	Medications	Paroxetine (N06AB05)	-0.00145243	0.942067	0.981831
Observed	Medications	Diclofenac (M01AB05)	-0.000566766	0.977377	0.994384
Observed	Medications	Antiinfectives and antiseptics, excl. combinations with corticosteroids (G01A)	-0.000926077	0.963042	0.994384
Observed	Medications	Corticosteroids (R01AD)	0.000650838	0.974022	0.994384
Observed	Medications	Prostaglandin analogues (S01EE)	-0.000542474	0.978346	0.994384
Observed	Medications	Sumatriptan (N02CC01)	-0.00042907	0.982872	0.994907
Observed	Medications	Propionic acid derivatives (M01AE)	0.000321247	0.987176	0.995202
Observed	Medications	Ketoprofen (M01AE03)	3.19618e-05	0.998724	0.998724
Observed	Medications	Corticosteroids, potent (group iii) (D07AC)	-0.000122494	0.99511	0.998724
Observed	Procedures	Cecum removed (N0Y1)	-0.0865384	1.46013e-05	0.000278548
Observed	Procedures	Anesthesia (last 6 months)	-0.0668066	0.000818671	0.00882741
Observed	Procedures	Coloscopy (last 6 months)	-0.0564686	0.00468892	0.0323014
Observed	Procedures	Tonsils removed (N0Y1)	-0.0426694	0.0328242	0.129213
Observed	Procedures	Intensive care (last 6 months)	-0.0247983	0.214615	0.440342
Observed	Other	Stool consistenct	-0.147097	2.12433e-10	1.31709e-08
Observed	Other	Has smoked (N0Y1)	-0.0880414	1.01607e-05	0.000209988
Observed	Other	Does physical exercise (N0Y1)	0.0785839	8.21515e-05	0.00119845
Observed	Other	Has smoked last year (N0Y1)	-0.0930681	0.00281873	0.0233015
Observed	Other	Probiotics usage frequency	-0.0473162	0.0179378	0.0881602
Observed	Other	Drinkingwater from well (N0Y1)	0.0440104	0.0277099	0.120562
Observed	Other	Born by caeserean section (N0Y1)	-0.0430274	0.0313852	0.125793
Observed	Other	Gut emptying frequency	0.0401422	0.0447161	0.161332
Observed	Other	Has used alcohol (N0Y1)	0.0225194	0.25988	0.511511
Observed	Other	Alcohol consumption frequency	-0.00856724	0.680868	0.883453
Observed	Other	Birthplace type city (N0Y1)	0.00780223	0.698914	0.88434
Observed	Other	Breastmilk in first monthes (N0Y1)	0.00753607	0.706343	0.889204
Observed	Other	Has pets (N0Y1)	0.000616455	0.975413	0.994384
Observed	Other	Sampling season	#N/A	#N/A	#N/A
Shannon	Intrinsic	Waist to hip ratio	-0.212928	4.81926e-27	1.19518e-24
Shannon	Intrinsic	Body mass index	-0.174609	1.38061e-18	1.71195e-16
Shannon	Intrinsic	Gender (M0F1)	0.172501	3.42709e-18	2.83306e-16
Shannon	Intrinsic	Blood pressure (systolic)	-0.129031	1.20248e-10	5.9643e-09
Shannon	Intrinsic	Age	0.00452846	0.821383	0.952398
Shannon	Dietary	Fresh fruit, berries	0.0948221	1.9831e-06	7.02583e-05
Shannon	Dietary	Whitebread	-0.0756592	0.000150016	0.00338218
Shannon	Dietary	Meat products (wieners, sausages)	-0.0731186	0.000248899	0.00485314
Shannon	Dietary	Potatoes	-0.0673727	0.00073862	0.0107323
Shannon	Dietary	Sweets	0.0677199	0.000693184	0.0107323
Shannon	Dietary	Fresh vegetables	0.0594752	0.00289684	0.0359208
Shannon	Dietary	Soft drinks	-0.0546346	0.00622508	0.0648051
Shannon	Dietary	Rice, pasta	-0.0492411	0.0136908	0.109526
Shannon	Dietary	Boiled vegetables	0.0408702	0.0407767	0.247873
Shannon	Dietary	Meat	-0.0401461	0.044482	0.250717
Shannon	Dietary	Bread	-0.0308548	0.122543	0.481375
Shannon	Dietary	Is Vegan (N0Y1)	-0.0298123	0.135701	0.486607
Shannon	Dietary	Coffee	0.0277487	0.164933	0.488425
Shannon	Dietary	Fish	0.0253267	0.205004	0.540862
Shannon	Dietary	Adds salt	0.0223982	0.262359	0.589056
Shannon	Dietary	Porridge, muesli	0.0221464	0.267763	0.589056
Shannon	Dietary	Compote, jams	-0.0225353	0.259449	0.589056
Shannon	Dietary	Eggs	0.00562233	0.778468	0.952398
Shannon	Dietary	Tea	-0.00229529	0.908568	0.980244
Shannon	Dietary	Dairy	0.00299961	0.880697	0.980244
Shannon	Dietary	Eating habit	#N/A	#N/A	#N/A
Shannon	Diseases	Hypertensive heart disease (I11)	-0.0971792	1.09418e-06	4.52261e-05
Shannon	Diseases	Candidiasis (B37)	0.0926818	3.36248e-06	0.000104237
Shannon	Diseases	Disorders of lipoprotein metabolism and other lipidemias (E78)	-0.0816057	4.31439e-05	0.00118885
Shannon	Diseases	Ovarian dysfunction (E28)	0.0730071	0.000254398	0.00485314
Shannon	Diseases	Essential (primary) hypertension (I10)	-0.0716475	0.000331318	0.00585772
Shannon	Diseases	Type 2 diabetes mellitus (E11)	-0.0670807	0.00077896	0.0107323
Shannon	Diseases	Gout (M10)	-0.0654057	0.00105257	0.0137389
Shannon	Diseases	Acute pharyngitis (J02)	0.0549286	0.00595173	0.0648051
Shannon	Diseases	Irritable bowel syndrome (K58)	-0.0523001	0.00882849	0.0810913
Shannon	Diseases	Female infertility (N97)	0.0524424	0.00864559	0.0810913
Shannon	Diseases	Iron deficiency anemia (D50)	0.0470296	0.0185512	0.139415
Shannon	Diseases	Has had chickenpox (N0Y1)	0.0384636	0.0543921	0.293245
Shannon	Diseases	Chronic ischemic heart disease (I25)	-0.036732	0.0659876	0.340936
Shannon	Diseases	Cholelithiasis (K80)	-0.034695	0.0824775	0.365258
Shannon	Diseases	Calculus of kidney and ureter (N20)	-0.0348231	0.0813508	0.365258
Shannon	Diseases	Lactose intolerance (E73)	0.0314513	0.115475	0.477758
Shannon	Diseases	Acute tonsillitis (J03)	0.0314416	0.115587	0.477758
Shannon	Diseases	Epilepsy and recurrent seizures (G40)	-0.0301306	0.131573	0.481375
Shannon	Diseases	Haemorrhoids (I84)	-0.0285637	0.152867	0.488425
Shannon	Diseases	Gastro-esophageal reflux disease (K21)	-0.0284599	0.154365	0.488425
Shannon	Diseases	Crohn's disease [regional enteritis] (K50)	-0.0283068	0.156596	0.488425
Shannon	Diseases	Acne (L70)	0.0288112	0.149339	0.488425
Shannon	Diseases	Schizophrenia (F20)	-0.02666	0.182149	0.519228
Shannon	Diseases	Atrial fibrillation and flutter (I48)	-0.0259155	0.194665	0.526343
Shannon	Diseases	Asthma (J45)	-0.0250164	0.210609	0.546733
Shannon	Diseases	Vitamin D deficiency (E55)	0.0244322	0.221463	0.565158
Shannon	Diseases	Acute appendicitis (K35)	-0.0242932	0.224104	0.565158
Shannon	Diseases	Chronic rhinitis, nasopharyngitis and pharyngitis (J31)	-0.022645	0.257137	0.589056
Shannon	Diseases	Ulcerative colitis (K51)	-0.022164	0.267382	0.589056
Shannon	Diseases	Migraine (G43)	0.021793	0.275474	0.594065
Shannon	Diseases	Chronic diseases of tonsils and adenoids (J35)	0.0204425	0.306333	0.627857
Shannon	Diseases	Vitamin B12 deficiency anemia (D51)	-0.0191431	0.338107	0.672077
Shannon	Diseases	Benign neoplasm of colon, rectum, anus and anal canal (D12)	-0.018508	0.354379	0.686609
Shannon	Diseases	Female genital prolapse (N81)	-0.0169427	0.396555	0.75073
Shannon	Diseases	Rheumatoid arthritis with rheumatoid factor (M05)	-0.0160876	0.420823	0.778836
Shannon	Diseases	Self reported physical health status OK (N0Y1)	0.0139576	0.484926	0.840991
Shannon	Diseases	Chronic viral hepatitis (B18)	-0.013103	0.512058	0.860162
Shannon	Diseases	Other arthritis (M13)	-0.0130638	0.513323	0.860162
Shannon	Diseases	Other rheumatoid arthritis (M06)	-0.01218	0.542228	0.887207
Shannon	Diseases	Type 1 diabetes mellitus (E10)	-0.0118707	0.552532	0.891588
Shannon	Diseases	Acute bronchitis (J20)	-0.0115388	0.563694	0.891588
Shannon	Diseases	Gastritis and duodenitis (K29)	-0.0108243	0.588088	0.891588
Shannon	Diseases	Atopic dermatitis (L20)	0.0104694	0.600384	0.891588
Shannon	Diseases	Psoriasis (L40)	-0.0106113	0.595453	0.891588
Shannon	Diseases	Menopausal and other perimenopausal disorders (N95)	0.0105985	0.595897	0.891588
Shannon	Diseases	Has seasonable allergy (N0Y1)	0.0109322	0.584748	0.891588
Shannon	Diseases	Heart failure (I50)	-0.00916339	0.646593	0.921581
Shannon	Diseases	Malignant neoplasm of colon (C18)	0.00870998	0.662973	0.930988
Shannon	Diseases	Osteoporosis without current pathological fracture (M81)	0.00866918	0.664455	0.930988
Shannon	Diseases	Parkinson's disease (G20)	0.00834797	0.676168	0.942077
Shannon	Diseases	Major depressive disorder, single episode (F32)	-0.0064502	0.746893	0.952398
Shannon	Diseases	Major depressive disorder, recurrent (F33)	0.00567483	0.776455	0.952398
Shannon	Diseases	Glaucoma (H40)	0.00618633	0.756914	0.952398
Shannon	Diseases	Other cardiac arrhythmias (I49)	-0.00440212	0.825668	0.952398
Shannon	Diseases	Vasomotor and allergic rhinitis (J30)	0.00515506	0.796457	0.952398
Shannon	Diseases	Other and unsp noninfective gastroenteritis and colitis (K52)	-0.00592709	0.766799	0.952398
Shannon	Diseases	Osteoporosis with current pathological fracture (M80)	-0.00525381	0.792646	0.952398
Shannon	Diseases	Chronic tubulo-interstitial nephritis (N11)	0.00469848	0.814139	0.952398
Shannon	Diseases	Chronic kidney disease (CKD) (N18)	0.00443632	0.824336	0.952398
Shannon	Diseases	Has been diagnosed with gum disease (N0Y1)	-0.0046795	0.815022	0.952398
Shannon	Diseases	Other anxiety disorders (F41)	-0.00408649	0.837988	0.960882
Shannon	Diseases	Eating disorders (F50)	-0.00248946	0.900872	0.980244
Shannon	Diseases	Polyosteoarthritis (M15)	-0.00230029	0.90837	0.980244
Shannon	Diseases	Acute tubulo-interstitial nephritis (N10)	0.00173375	0.930872	0.990799
Shannon	Diseases	Endometriosis (N80)	0.00181292	0.927723	0.990799
Shannon	Diseases	Self reported mental health status OK (N0Y1)	0.00119047	0.952502	0.998615
Shannon	Diseases	Benign neoplasm of mouth and pharynx (D10)	-2.62487e-05	0.998952	0.998952
Shannon	Diseases	Bipolar disorder (F31)	8.06243e-05	0.996781	0.998952
Shannon	Diseases	Age-related cataract (H25)	-0.000426979	0.982955	0.998952
Shannon	Diseases	Atherosclerosis (I70)	0.000421138	0.983189	0.998952
Shannon	Diseases	Gastric ulcer (K25)	-0.000157899	0.993696	0.998952
Shannon	Medications	Pantoprazole (A02BC02)	0.0510974	0.0105177	0.0928187
Shannon	Medications	Insulins and analogues for injection, long-acting (A10AE)	-0.0508788	0.0108538	0.0928187
Shannon	Medications	Other antidepressants (N06AX)	0.0504749	0.0115002	0.0950685
Shannon	Medications	Estradiol (G03CA03)	0.0472045	0.0181182	0.139415
Shannon	Medications	Telmisartan+hydrochlorothiazide (C09DA07)	-0.0460575	0.0211268	0.149699
Shannon	Medications	Antibiotics usage history (last 10 years)	0.0513891	0.0207756	0.149699
Shannon	Medications	Ace inhibitors and diuretics (C09BA)	0.0443551	0.0263915	0.181808
Shannon	Medications	Other antihistamines for systemic use (R06AX)	0.041598	0.0373191	0.243556
Shannon	Medications	Metoprolol (C07AB02)	-0.0411844	0.0392519	0.247873
Shannon	Medications	Fluticasone furoate (R01AD12)	0.0404647	0.0428182	0.250717
Shannon	Medications	Nebivolol (C07AB12)	-0.0385874	0.0534286	0.293245
Shannon	Medications	Levothyroxine sodium (H03AA01)	0.0372957	0.061938	0.326822
Shannon	Medications	Dopaminergic agents (N04B)	0.0365033	0.0676924	0.342607
Shannon	Medications	Dihydropyridine derivatives (C08CA)	-0.0359921	0.0716319	0.355294
Shannon	Medications	Drospirenone+ethinylestradiol (G03AA12)	0.0352339	0.07782	0.365258
Shannon	Medications	Valaciclovir (J05AB11)	0.0349569	0.0801867	0.365258
Shannon	Medications	Organic nitrates (C01DA)	-0.0351033	0.0789288	0.365258
Shannon	Medications	Metformin (A10BA02)	-0.0324148	0.104739	0.447847
Shannon	Medications	Angiotensin ii antagonists and diuretics (C09DA)	-0.0325836	0.102942	0.447847
Shannon	Medications	Trimetazidine (C01EB15)	-0.0306254	0.125349	0.481375
Shannon	Medications	Torasemide (C03CA04)	-0.0302014	0.130669	0.481375
Shannon	Medications	Telmisartan+amlodipine (C09DB04)	-0.0302673	0.12983	0.481375
Shannon	Medications	Betahistine (N07CA01)	0.0300981	0.13199	0.481375
Shannon	Medications	Beta blocking agents (C07A)	0.0296874	0.137349	0.486607
Shannon	Medications	Gonadotropins and other ovulation stimulants (G03G)	0.0290399	0.146136	0.488425
Shannon	Medications	Adrenergics, inhalants (R03A)	-0.0278547	0.163324	0.488425
Shannon	Medications	Ketoprofen (M01AE03)	-0.0281184	0.159374	0.488425
Shannon	Medications	Corticosteroids, combinations with antiseptics (D07B)	-0.0283239	0.156345	0.488425
Shannon	Medications	Progestogens and estrogens, fixed combinations (G03FA)	0.0284581	0.154392	0.488425
Shannon	Medications	Warfarin (B01AA03)	-0.0277158	0.165434	0.488425
Shannon	Medications	Beta blocking agents (S01ED)	-0.0285951	0.152416	0.488425
Shannon	Medications	Aminosalicylic acid and similar agents (A07EC)	-0.0278414	0.163526	0.488425
Shannon	Medications	N02AJ06	0.0270722	0.17548	0.511988
Shannon	Medications	Antibiotics (S01AA)	-0.0263445	0.187377	0.526343
Shannon	Medications	Gabapentin (N03AX12)	-0.025905	0.194847	0.526343
Shannon	Medications	Antiinfectives for treatment of acne (D10AF)	0.0259418	0.194212	0.526343
Shannon	Medications	Timolol (S01ED01)	0.0258813	0.195256	0.526343
Shannon	Medications	Perindopril+amlodipine (C09BB04)	-0.0254509	0.20279	0.540773
Shannon	Medications	Encephalitis, tick borne, inactivated, whole virus (J07BA01)	-0.0249601	0.211639	0.546733
Shannon	Medications	Antithrombotic agents (B01A)	0.0242145	0.225607	0.565158
Shannon	Medications	Pseudoephedrine+cetirizine (R01BA93)	0.0239552	0.230617	0.571929
Shannon	Medications	Progestogens (G03D)	0.0236382	0.236848	0.576846
Shannon	Medications	Other dermatological preparations (D11A)	0.0236179	0.237251	0.576846
Shannon	Medications	Blood glucose lowering drugs, excl. insulins (A10B)	-0.0233585	0.242442	0.578132
Shannon	Medications	Glucosamine (M01AX05)	0.0234353	0.240898	0.578132
Shannon	Medications	Atorvastatin (C10AA05)	-0.0220348	0.270182	0.589056
Shannon	Medications	Omeprazole (A02BC01)	-0.0222606	0.265301	0.589056
Shannon	Medications	Vitamin b12 and folic acid (B03B)	-0.0220075	0.270776	0.589056
Shannon	Medications	Diclofenac (M01AB05)	0.0222875	0.264724	0.589056
Shannon	Medications	Candesartan (C09CA06)	-0.0216112	0.279501	0.597555
Shannon	Medications	Isoconazole+diflucortolone (D01AC80)	-0.0212963	0.286567	0.602276
Shannon	Medications	Zolpidem (N05CF02)	-0.0213009	0.286463	0.602276
Shannon	Medications	Latanoprost (S01EE01)	0.0210593	0.291967	0.608469
Shannon	Medications	Sumatriptan (N02CC01)	0.0209279	0.294988	0.609642
Shannon	Medications	Etoricoxib (M01AH05)	-0.0191177	0.338748	0.672077
Shannon	Medications	Mebeverine (A03AA04)	-0.0192714	0.334879	0.672077
Shannon	Medications	Corticosteroids (R01AD)	0.0188701	0.345042	0.67913
Shannon	Medications	Rivaroxaban (B01AF01)	-0.0186466	0.350788	0.685003
Shannon	Medications	Mometasone (R01AD09)	0.0176746	0.376472	0.718193
Shannon	Medications	Naproxen+esomeprazole (M01AE52)	-0.017751	0.374411	0.718193
Shannon	Medications	Simvastatin (C10AA01)	0.0164078	0.411634	0.773373
Shannon	Medications	Perindopril+amlodipine+indapamide (C09BX01)	-0.0154153	0.4405	0.809216
Shannon	Medications	Venlafaxine (N06AX16)	0.0151898	0.447215	0.815509
Shannon	Medications	Cetirizine (R06AE07)	-0.0146643	0.46309	0.831324
Shannon	Medications	Alfuzosin (G04CA01)	-0.0144106	0.470867	0.831324
Shannon	Medications	Corticosteroids, potent (group iii) (D07AC)	0.0142618	0.475458	0.831324
Shannon	Medications	Lipase+amylase+protease (A09AA02)	-0.0144144	0.470749	0.831324
Shannon	Medications	Sildenafil (G04BE03)	-0.0145085	0.467855	0.831324
Shannon	Medications	Paroxetine (N06AB05)	0.0142443	0.476	0.831324
Shannon	Medications	Escitalopram (N06AB10)	0.0137253	0.492223	0.847718
Shannon	Medications	Celecoxib (M01AH01)	-0.0134335	0.501471	0.851813
Shannon	Medications	Perindopril (C09AA04)	0.0134365	0.501375	0.851813
Shannon	Medications	Drugs for urinary frequency and incontinence (G04BD)	0.0128566	0.520025	0.865544
Shannon	Medications	Desogestrel (G03AC09)	0.0126754	0.525923	0.869527
Shannon	Medications	Gestodene+ethinylestradiol (G03AA10)	0.0121334	0.543772	0.887207
Shannon	Medications	Alprazolam (N05BA12)	-0.0108911	0.585785	0.891588
Shannon	Medications	Tramadol (N02AX02)	-0.0113386	0.570481	0.891588
Shannon	Medications	Pregabalin (N03AX16)	0.0110021	0.581973	0.891588
Shannon	Medications	Quetiapine (N05AH04)	-0.011361	0.569719	0.891588
Shannon	Medications	Antiinflammatory and antirheumatic products, non-steroids (M01A)	0.0105312	0.598234	0.891588
Shannon	Medications	Selective serotonin reuptake inhibitors (N06AB)	-0.0113438	0.570304	0.891588
Shannon	Medications	Dienogest+ethinylestradiol (G03AA16)	0.0105177	0.598702	0.891588
Shannon	Medications	Progestogens and estrogens, fixed combinations (G03AA)	-0.0113143	0.571307	0.891588
Shannon	Medications	Lercanidipine (C08CA13)	-0.00999358	0.617046	0.904325
Shannon	Medications	Rosuvastatin (C10AA07)	-0.00978693	0.624346	0.904325
Shannon	Medications	Glucocorticoids (H02AB)	0.00989363	0.620572	0.904325
Shannon	Medications	Imidazole derivatives (G01AF)	0.0097066	0.627193	0.904325
Shannon	Medications	Bupropione (N06AX12)	0.00999832	0.616879	0.904325
Shannon	Medications	Agomelatine (N06AX22)	-0.00928785	0.642127	0.920505
Shannon	Medications	Dexamethasone+tobramycin (S01CA81)	0.00890707	0.655833	0.929408
Shannon	Medications	Indapamide (C03BA11)	-0.00808931	0.685658	0.949961
Shannon	Medications	Esomeprazole (A02BC05)	0.006436	0.747431	0.952398
Shannon	Medications	Tamsulosin (G04CA02)	-0.00628586	0.753129	0.952398
Shannon	Medications	Zopiclone (N05CF01)	0.00491951	0.805567	0.952398
Shannon	Medications	Amlodipine (C08CA01)	0.00773029	0.698911	0.952398
Shannon	Medications	Dexamethasone+chloramphenicol (S01CA82)	-0.00591454	0.767279	0.952398
Shannon	Medications	Alendronic acid+colecalciferol (M05BB03)	0.00480628	0.809955	0.952398
Shannon	Medications	Telmisartan (C09CA07)	-0.00659774	0.741308	0.952398
Shannon	Medications	Tizanidine (M03BX02)	0.00766699	0.701258	0.952398
Shannon	Medications	Betamethasone+fusidic acid (D07CC80)	-0.00570317	0.775368	0.952398
Shannon	Medications	Antifungals for topical use (D01A)	0.00709591	0.722553	0.952398
Shannon	Medications	Non-selective monoamine reuptake inhibitors (N06AA)	0.00478755	0.810682	0.952398
Shannon	Medications	Duloxetine (N06AX21)	-0.00717029	0.719767	0.952398
Shannon	Medications	Antiinfectives and antiseptics, excl. combinations with corticosteroids (G01A)	0.00483062	0.809012	0.952398
Shannon	Medications	Sertraline (N06AB06)	-0.00448001	0.822634	0.952398
Shannon	Medications	Lornoxicam (M01AC05)	-0.00645414	0.746744	0.952398
Shannon	Medications	Enalapril (C09AA02)	-0.00643745	0.747376	0.952398
Shannon	Medications	Influenza, inactivated, split virus or surface antigen (J07BB02)	0.0051932	0.794984	0.952398
Shannon	Medications	Adrenergics in combination with corticosteroids or other drugs, excl. anticholinergics (R03AK)	-0.00573973	0.773967	0.952398
Shannon	Medications	Fluconazole (J02AC01)	-0.00671093	0.737033	0.952398
Shannon	Medications	Levonorgestrel (G02BA03)	0.00476852	0.81142	0.952398
Shannon	Medications	Other immunosuppressants (L04AX)	-0.0052935	0.791116	0.952398
Shannon	Medications	Vilanterol+fluticasone furoate (R03AK10)	0.00541947	0.786264	0.952398
Shannon	Medications	Prostaglandin analogues (S01EE)	0.00479477	0.810402	0.952398
Shannon	Medications	Propionic acid derivatives (M01AE)	0.00632898	0.751491	0.952398
Shannon	Medications	Allopurinol (M04AA01)	-0.0040153	0.840772	0.960882
Shannon	Medications	Propranolol (C07AA05)	-0.00380072	0.849176	0.966035
Shannon	Medications	Apixaban (B01AF02)	0.00332402	0.867907	0.978368
Shannon	Medications	Mometasone (D07AC13)	0.00239782	0.904503	0.980244
Shannon	Medications	Antiepileptics (N03A)	-0.00228194	0.909097	0.980244
Shannon	Medications	Meloxicam (M01AC06)	0.00258407	0.897125	0.980244
Shannon	Medications	Tamsulosin+dutasteride (G04CA52)	0.00295239	0.882561	0.980244
Shannon	Medications	Direct acting antivirals (J05A)	-0.00267794	0.89341	0.980244
Shannon	Medications	Angiotensin ii antagonists, plain (C09CA)	-0.00263364	0.895163	0.980244
Shannon	Medications	Fluocortolone+lidocaine (C05AA84)	-0.00209842	0.91638	0.983819
Shannon	Medications	Perindopril+indapamide (C09BA04)	0.00132116	0.947295	0.998615
Shannon	Medications	Formoterol+budesonide (R03AK07)	-0.00127048	0.949314	0.998615
Shannon	Medications	Antidepressants usage history (last 10 years)	-0.00120397	0.954322	0.998615
Shannon	Medications	Propafenone (C01BC03)	0.000783844	0.968715	0.998952
Shannon	Medications	Benzodiazepine derivatives (N05BA)	0.000379655	0.984844	0.998952
Shannon	Medications	Ramipril (C09AA05)	0.000746135	0.97022	0.998952
Shannon	Medications	Opioids (N02A)	0.000813711	0.967524	0.998952
Shannon	Medications	Diazepam (N05BA01)	0.000609195	0.975683	0.998952
Shannon	Medications	Ibuprofen (M01AE01)	6.25805e-05	0.997502	0.998952
Shannon	Procedures	Anesthesia (last 6 months)	-0.0563464	0.00477946	0.0564431
Shannon	Procedures	Coloscopy (last 6 months)	-0.0540057	0.00684797	0.0679319
Shannon	Procedures	Intensive care (last 6 months)	-0.0312027	0.118381	0.481286
Shannon	Procedures	Tonsils removed (N0Y1)	0.0267844	0.180465	0.519228
Shannon	Procedures	Cecum removed (N0Y1)	-0.0222512	0.265886	0.589056
Shannon	Other	Stool consistenct	-0.19008	1.7408e-16	1.0793e-14
Shannon	Other	Has smoked (N0Y1)	-0.0766055	0.000123739	0.00306872
Shannon	Other	Gut emptying frequency	0.0713698	0.000354297	0.00585772
Shannon	Other	Does physical exercise (N0Y1)	0.0545858	0.00627147	0.0648051
Shannon	Other	Birthplace type city (N0Y1)	0.0420385	0.0370779	0.243556
Shannon	Other	Born by caeserean section (N0Y1)	-0.0408619	0.040979	0.247873
Shannon	Other	Has smoked last year (N0Y1)	-0.0628111	0.0440711	0.250717
Shannon	Other	Has pets (N0Y1)	-0.0350549	0.0795831	0.365258
Shannon	Other	Drinkingwater from well (N0Y1)	-0.0304472	0.127868	0.481375
Shannon	Other	Probiotics usage frequency	0.0278587	0.163599	0.488425
Shannon	Other	Alcohol consumption frequency	-0.0204219	0.32686	0.664437
Shannon	Other	Has used alcohol (N0Y1)	-0.0162112	0.417354	0.778224
Shannon	Other	Breastmilk in first monthes (N0Y1)	-0.00352103	0.860267	0.974184
Shannon	Other	Sampling season	#N/A	#N/A	#N/A

## Sheet: AlphaDiv_KEGGko
Metric	factor_group	factor_name	estimate	p.value	FDR	adjusted
Observed	Intrinsic	Body mass index	-0.0745632	0.000188665	0.0155963	NONE
Observed	Intrinsic	Waist to hip ratio	-0.0689967	0.000553142	0.019597	NONE
Observed	Intrinsic	Blood pressure (systolic)	-0.0515527	0.0103602	0.116788	NONE
Observed	Intrinsic	Age	0.0459183	0.021995	0.17596	NONE
Observed	Intrinsic	Gender (M0F1)	0.0218662	0.273864	0.62287	NONE
Observed	Dietary	Fresh fruit, berries	0.0841243	2.47974e-05	0.00614976	NONE
Observed	Dietary	Adds salt	0.0640399	0.00133882	0.027849	NONE
Observed	Dietary	Porridge, muesli	0.0642399	0.00129284	0.027849	NONE
Observed	Dietary	Fresh vegetables	0.0643502	0.00126811	0.027849	NONE
Observed	Dietary	Boiled vegetables	0.0640027	0.00134753	0.027849	NONE
Observed	Dietary	Soft drinks	-0.0634407	0.00148573	0.0283314	NONE
Observed	Dietary	Meat products (wieners, sausages)	-0.0507785	0.0110113	0.118731	NONE
Observed	Dietary	Compote, jams	0.0487491	0.0146623	0.151511	NONE
Observed	Dietary	Bread	0.0446128	0.0255284	0.19049	NONE
Observed	Dietary	Eggs	0.0387092	0.052679	0.28442	NONE
Observed	Dietary	Tea	0.0364104	0.0683943	0.332584	NONE
Observed	Dietary	Fish	0.0355883	0.0748757	0.333649	NONE
Observed	Dietary	Whitebread	-0.0345294	0.0839538	0.340731	NONE
Observed	Dietary	Is Vegan (N0Y1)	-0.023372	0.24217	0.612111	NONE
Observed	Dietary	Dairy	0.0210387	0.292439	0.625214	NONE
Observed	Dietary	Sweets	0.0211093	0.290822	0.625214	NONE
Observed	Dietary	Coffee	-0.0202577	0.310726	0.653051	NONE
Observed	Dietary	Rice, pasta	-0.0188059	0.346687	0.656323	NONE
Observed	Dietary	Meat	0.00464483	0.816223	0.924308	NONE
Observed	Dietary	Potatoes	-0.0011968	0.95225	0.983991	NONE
Observed	Dietary	Eating habit	#N/A	#N/A	#N/A	NONE
Observed	Diseases	Essential (primary) hypertension (I10)	-0.0705718	0.000407055	0.019597	NONE
Observed	Diseases	Gout (M10)	-0.0694427	0.000503734	0.019597	NONE
Observed	Diseases	Other anxiety disorders (F41)	-0.0653528	0.00106252	0.027849	NONE
Observed	Diseases	Self reported mental health status OK (N0Y1)	0.0630137	0.00159935	0.0283314	NONE
Observed	Diseases	Iron deficiency anemia (D50)	0.059915	0.00269501	0.0424877	NONE
Observed	Diseases	Irritable bowel syndrome (K58)	-0.0577615	0.00382176	0.0557527	NONE
Observed	Diseases	Acute appendicitis (K35)	-0.0569914	0.00431881	0.0595036	NONE
Observed	Diseases	Gastro-esophageal reflux disease (K21)	-0.0556223	0.00534914	0.0698204	NONE
Observed	Diseases	Chronic diseases of tonsils and adenoids (J35)	-0.0527382	0.00827617	0.102624	NONE
Observed	Diseases	Gastric ulcer (K25)	0.0472362	0.0180406	0.169751	NONE
Observed	Diseases	Epilepsy and recurrent seizures (G40)	-0.0441495	0.0270985	0.192012	NONE
Observed	Diseases	Acute bronchitis (J20)	-0.0430512	0.0311566	0.214634	NONE
Observed	Diseases	Endometriosis (N80)	-0.0417838	0.0364773	0.238062	NONE
Observed	Diseases	Chronic ischemic heart disease (I25)	0.0414579	0.0379646	0.241039	NONE
Observed	Diseases	Haemorrhoids (I84)	-0.0410601	0.0398492	0.241039	NONE
Observed	Diseases	Cholelithiasis (K80)	-0.0381557	0.0561567	0.290143	NONE
Observed	Diseases	Ulcerative colitis (K51)	-0.0369989	0.064044	0.324141	NONE
Observed	Diseases	Major depressive disorder, single episode (F32)	-0.0355317	0.0753401	0.333649	NONE
Observed	Diseases	Heart failure (I50)	0.0355957	0.0748156	0.333649	NONE
Observed	Diseases	Acute tonsillitis (J03)	-0.0358004	0.0731576	0.333649	NONE
Observed	Diseases	Gastritis and duodenitis (K29)	-0.0352388	0.0777792	0.338408	NONE
Observed	Diseases	Crohn's disease [regional enteritis] (K50)	-0.0343421	0.085648	0.340731	NONE
Observed	Diseases	Asthma (J45)	-0.0332593	0.0959944	0.360706	NONE
Observed	Diseases	Chronic viral hepatitis (B18)	-0.0329618	0.0990056	0.361079	NONE
Observed	Diseases	Lactose intolerance (E73)	-0.0299923	0.133355	0.435159	NONE
Observed	Diseases	Vitamin B12 deficiency anemia (D51)	0.0276812	0.165962	0.501934	NONE
Observed	Diseases	Type 1 diabetes mellitus (E10)	0.0255842	0.200435	0.569705	NONE
Observed	Diseases	Acute pharyngitis (J02)	-0.0254868	0.202153	0.569705	NONE
Observed	Diseases	Major depressive disorder, recurrent (F33)	-0.0251305	0.208536	0.581089	NONE
Observed	Diseases	Type 2 diabetes mellitus (E11)	0.0248219	0.214179	0.585407	NONE
Observed	Diseases	Polyosteoarthritis (M15)	-0.0241313	0.227207	0.605885	NONE
Observed	Diseases	Other rheumatoid arthritis (M06)	0.0239739	0.230254	0.607478	NONE
Observed	Diseases	Candidiasis (B37)	0.0228511	0.25283	0.612111	NONE
Observed	Diseases	Malignant neoplasm of colon (C18)	-0.0227521	0.254891	0.612111	NONE
Observed	Diseases	Age-related cataract (H25)	0.0233124	0.243374	0.612111	NONE
Observed	Diseases	Self reported physical health status OK (N0Y1)	0.022389	0.262555	0.62013	NONE
Observed	Diseases	Menopausal and other perimenopausal disorders (N95)	-0.021467	0.282722	0.62287	NONE
Observed	Diseases	Calculus of kidney and ureter (N20)	-0.0210946	0.291157	0.625214	NONE
Observed	Diseases	Atrial fibrillation and flutter (I48)	0.0203887	0.307608	0.652024	NONE
Observed	Diseases	Ovarian dysfunction (E28)	-0.0195858	0.327051	0.656323	NONE
Observed	Diseases	Disorders of lipoprotein metabolism and other lipidemias (E78)	-0.0191973	0.336741	0.656323	NONE
Observed	Diseases	Atherosclerosis (I70)	0.0197868	0.322111	0.656323	NONE
Observed	Diseases	Other and unsp noninfective gastroenteritis and colitis (K52)	-0.0192184	0.33621	0.656323	NONE
Observed	Diseases	Osteoporosis with current pathological fracture (M80)	0.0179971	0.367824	0.670738	NONE
Observed	Diseases	Parkinson's disease (G20)	0.0171844	0.389853	0.700605	NONE
Observed	Diseases	Chronic kidney disease (CKD) (N18)	0.0144905	0.468409	0.764246	NONE
Observed	Diseases	Hypertensive heart disease (I11)	-0.0138869	0.48714	0.784485	NONE
Observed	Diseases	Psoriasis (L40)	-0.013572	0.497072	0.795315	NONE
Observed	Diseases	Atopic dermatitis (L20)	0.0133473	0.504222	0.801584	NONE
Observed	Diseases	Chronic tubulo-interstitial nephritis (N11)	-0.0127176	0.524548	0.81129	NONE
Observed	Diseases	Has seasonable allergy (N0Y1)	-0.0126648	0.526684	0.81129	NONE
Observed	Diseases	Eating disorders (F50)	-0.0118737	0.552431	0.815493	NONE
Observed	Diseases	Vasomotor and allergic rhinitis (J30)	-0.0122665	0.539362	0.815493	NONE
Observed	Diseases	Other arthritis (M13)	-0.0116301	0.560613	0.819395	NONE
Observed	Diseases	Schizophrenia (F20)	0.0108845	0.586014	0.830466	NONE
Observed	Diseases	Other cardiac arrhythmias (I49)	-0.0109165	0.584913	0.830466	NONE
Observed	Diseases	Female infertility (N97)	-0.0107755	0.589769	0.830814	NONE
Observed	Diseases	Glaucoma (H40)	0.0103287	0.60529	0.834799	NONE
Observed	Diseases	Benign neoplasm of mouth and pharynx (D10)	0.00968579	0.627932	0.855643	NONE
Observed	Diseases	Migraine (G43)	-0.00937809	0.638896	0.856466	NONE
Observed	Diseases	Chronic rhinitis, nasopharyngitis and pharyngitis (J31)	0.00869244	0.66361	0.866186	NONE
Observed	Diseases	Vitamin D deficiency (E55)	0.00790334	0.692511	0.880732	NONE
Observed	Diseases	Bipolar disorder (F31)	0.00693753	0.728498	0.889988	NONE
Observed	Diseases	Rheumatoid arthritis with rheumatoid factor (M05)	-0.00603166	0.762807	0.908515	NONE
Observed	Diseases	Has been diagnosed with gum disease (N0Y1)	-0.00579769	0.771925	0.908515	NONE
Observed	Diseases	Benign neoplasm of colon, rectum, anus and anal canal (D12)	-0.00559858	0.77938	0.911728	NONE
Observed	Diseases	Osteoporosis without current pathological fracture (M81)	0.00493733	0.804877	0.919859	NONE
Observed	Diseases	Female genital prolapse (N81)	-0.00404347	0.83967	0.933803	NONE
Observed	Diseases	Acne (L70)	-0.00342648	0.863875	0.947968	NONE
Observed	Diseases	Has had chickenpox (N0Y1)	0.00242927	0.903333	0.96312	NONE
Observed	Diseases	Acute tubulo-interstitial nephritis (N10)	-0.00154927	0.938212	0.981757	NONE
Observed	Medications	Antibiotics usage history (last 10 years)	-0.0806104	0.000283158	0.0175558	NONE
Observed	Medications	Simvastatin (C10AA01)	0.0477057	0.0169259	0.167905	NONE
Observed	Medications	Tamsulosin+dutasteride (G04CA52)	0.0470577	0.0184809	0.169751	NONE
Observed	Medications	Antibiotics (S01AA)	-0.0465081	0.0198966	0.170151	NONE
Observed	Medications	Nebivolol (C07AB12)	-0.0466096	0.0196282	0.170151	NONE
Observed	Medications	Blood glucose lowering drugs, excl. insulins (A10B)	0.0462109	0.0207009	0.171127	NONE
Observed	Medications	Tamsulosin (G04CA02)	0.0444367	0.0261155	0.19049	NONE
Observed	Medications	Antithrombotic agents (B01A)	0.0424654	0.0335272	0.224723	NONE
Observed	Medications	Mometasone (D07AC13)	0.041133	0.0394981	0.241039	NONE
Observed	Medications	Antiinfectives and antiseptics, excl. combinations with corticosteroids (G01A)	0.0399929	0.0453012	0.267493	NONE
Observed	Medications	Trimetazidine (C01EB15)	-0.0395537	0.0477214	0.27523	NONE
Observed	Medications	Pantoprazole (A02BC02)	0.0365674	0.0672109	0.332584	NONE
Observed	Medications	Metoprolol (C07AB02)	-0.0357769	0.0733462	0.333649	NONE
Observed	Medications	Dopaminergic agents (N04B)	0.0345084	0.0841425	0.340731	NONE
Observed	Medications	Agomelatine (N06AX22)	-0.034243	0.0865566	0.340731	NONE
Observed	Medications	Allopurinol (M04AA01)	-0.0349169	0.0805337	0.340731	NONE
Observed	Medications	Corticosteroids (R01AD)	-0.0348115	0.0814525	0.340731	NONE
Observed	Medications	Telmisartan+amlodipine (C09DB04)	-0.033825	0.0904706	0.350574	NONE
Observed	Medications	Isoconazole+diflucortolone (D01AC80)	0.0330944	0.0976549	0.361079	NONE
Observed	Medications	Lipase+amylase+protease (A09AA02)	-0.0324126	0.104763	0.37654	NONE
Observed	Medications	Pseudoephedrine+cetirizine (R01BA93)	-0.0315213	0.114666	0.400525	NONE
Observed	Medications	Adrenergics, inhalants (R03A)	-0.0315862	0.113921	0.400525	NONE
Observed	Medications	Metformin (A10BA02)	0.0309764	0.121075	0.41362	NONE
Observed	Medications	Antidepressants usage history (last 10 years)	-0.0325174	0.121751	0.41362	NONE
Observed	Medications	Gestodene+ethinylestradiol (G03AA10)	-0.0306418	0.125147	0.41382	NONE
Observed	Medications	Progestogens and estrogens, fixed combinations (G03AA)	0.0307716	0.123555	0.41382	NONE
Observed	Medications	Ramipril (C09AA05)	0.0295262	0.139497	0.449289	NONE
Observed	Medications	Glucocorticoids (H02AB)	-0.0289843	0.146909	0.467096	NONE
Observed	Medications	Mometasone (R01AD09)	0.0284868	0.153976	0.483367	NONE
Observed	Medications	Lercanidipine (C08CA13)	0.0282915	0.15682	0.486143	NONE
Observed	Medications	Antiepileptics (N03A)	-0.0277709	0.164595	0.501934	NONE
Observed	Medications	Gonadotropins and other ovulation stimulants (G03G)	0.02617	0.190317	0.55346	NONE
Observed	Medications	Other antidepressants (N06AX)	0.0246609	0.217167	0.585407	NONE
Observed	Medications	Zolpidem (N05CF02)	0.0247401	0.215694	0.585407	NONE
Observed	Medications	Fluconazole (J02AC01)	0.0238251	0.23316	0.60867	NONE
Observed	Medications	Perindopril+indapamide (C09BA04)	-0.0230809	0.248088	0.612111	NONE
Observed	Medications	Escitalopram (N06AB10)	-0.0227362	0.255224	0.612111	NONE
Observed	Medications	Fluticasone furoate (R01AD12)	0.0226661	0.256692	0.612111	NONE
Observed	Medications	Perindopril+amlodipine+indapamide (C09BX01)	0.0230125	0.249493	0.612111	NONE
Observed	Medications	Sertraline (N06AB06)	-0.0232735	0.244162	0.612111	NONE
Observed	Medications	Gabapentin (N03AX12)	-0.0218299	0.274662	0.62287	NONE
Observed	Medications	Tramadol (N02AX02)	-0.0214187	0.283808	0.62287	NONE
Observed	Medications	Influenza, inactivated, split virus or surface antigen (J07BB02)	0.0214474	0.283161	0.62287	NONE
Observed	Medications	Selective serotonin reuptake inhibitors (N06AB)	-0.0214234	0.283701	0.62287	NONE
Observed	Medications	Organic nitrates (C01DA)	-0.0219046	0.273023	0.62287	NONE
Observed	Medications	Dienogest+ethinylestradiol (G03AA16)	-0.0217989	0.275345	0.62287	NONE
Observed	Medications	Beta blocking agents (C07A)	0.0201106	0.314254	0.654915	NONE
Observed	Medications	Telmisartan+hydrochlorothiazide (C09DA07)	-0.0199788	0.317436	0.656034	NONE
Observed	Medications	Propafenone (C01BC03)	0.0189168	0.34385	0.656323	NONE
Observed	Medications	Atorvastatin (C10AA05)	0.0188178	0.346381	0.656323	NONE
Observed	Medications	Sumatriptan (N02CC01)	0.0194512	0.330388	0.656323	NONE
Observed	Medications	Duloxetine (N06AX21)	-0.0192426	0.335603	0.656323	NONE
Observed	Medications	Enalapril (C09AA02)	0.0194876	0.329484	0.656323	NONE
Observed	Medications	Antiinflammatory and antirheumatic products, non-steroids (M01A)	0.0188532	0.345474	0.656323	NONE
Observed	Medications	Amlodipine (C08CA01)	0.018447	0.355969	0.66622	NONE
Observed	Medications	Angiotensin ii antagonists and diuretics (C09DA)	-0.0183965	0.357288	0.66622	NONE
Observed	Medications	Opioids (N02A)	0.0182516	0.361087	0.66828	NONE
Observed	Medications	Formoterol+budesonide (R03AK07)	-0.0180384	0.366724	0.670738	NONE
Observed	Medications	Insulins and analogues for injection, long-acting (A10AE)	0.0177835	0.373536	0.676182	NONE
Observed	Medications	Cetirizine (R06AE07)	0.0169917	0.395191	0.703291	NONE
Observed	Medications	Antifungals for topical use (D01A)	0.0169261	0.397019	0.703291	NONE
Observed	Medications	Drugs for urinary frequency and incontinence (G04BD)	0.0167839	0.400997	0.705299	NONE
Observed	Medications	Ace inhibitors and diuretics (C09BA)	0.0164692	0.409889	0.705919	NONE
Observed	Medications	N02AJ06	0.0165625	0.40724	0.705919	NONE
Observed	Medications	Latanoprost (S01EE01)	0.016562	0.407255	0.705919	NONE
Observed	Medications	Corticosteroids, combinations with antiseptics (D07B)	0.0162167	0.417104	0.713391	NONE
Observed	Medications	Lornoxicam (M01AC05)	0.0160415	0.422156	0.717086	NONE
Observed	Medications	Rivaroxaban (B01AF01)	-0.0156301	0.434156	0.732454	NONE
Observed	Medications	Glucosamine (M01AX05)	-0.0152397	0.445723	0.746887	NONE
Observed	Medications	Torasemide (C03CA04)	-0.0149234	0.455225	0.75769	NONE
Observed	Medications	Zopiclone (N05CF01)	-0.0145743	0.46584	0.764246	NONE
Observed	Medications	Indapamide (C03BA11)	-0.0146621	0.463157	0.764246	NONE
Observed	Medications	Aminosalicylic acid and similar agents (A07EC)	-0.0139873	0.483997	0.784485	NONE
Observed	Medications	Celecoxib (M01AH01)	0.012969	0.516383	0.81129	NONE
Observed	Medications	Valaciclovir (J05AB11)	-0.0127432	0.523714	0.81129	NONE
Observed	Medications	Warfarin (B01AA03)	-0.0128675	0.51967	0.81129	NONE
Observed	Medications	Naproxen+esomeprazole (M01AE52)	-0.0124657	0.532795	0.815248	NONE
Observed	Medications	Dexamethasone+chloramphenicol (S01CA82)	0.0119072	0.551312	0.815493	NONE
Observed	Medications	Etoricoxib (M01AH05)	-0.0119477	0.549957	0.815493	NONE
Observed	Medications	Mebeverine (A03AA04)	0.0120631	0.54611	0.815493	NONE
Observed	Medications	Non-selective monoamine reuptake inhibitors (N06AA)	0.0115984	0.561682	0.819395	NONE
Observed	Medications	Direct acting antivirals (J05A)	0.0108865	0.585945	0.830466	NONE
Observed	Medications	Beta blocking agents (S01ED)	0.0112073	0.574953	0.830466	NONE
Observed	Medications	Timolol (S01ED01)	-0.0106832	0.59296	0.830814	NONE
Observed	Medications	Other antihistamines for systemic use (R06AX)	0.010324	0.605453	0.834799	NONE
Observed	Medications	Quetiapine (N05AH04)	0.0103111	0.605902	0.834799	NONE
Observed	Medications	Levonorgestrel (G02BA03)	-0.00994828	0.618643	0.847644	NONE
Observed	Medications	Estradiol (G03CA03)	-0.00945155	0.636271	0.856466	NONE
Observed	Medications	Desogestrel (G03AC09)	-0.00955397	0.632619	0.856466	NONE
Observed	Medications	Alendronic acid+colecalciferol (M05BB03)	0.00905853	0.650367	0.862518	NONE
Observed	Medications	Progestogens and estrogens, fixed combinations (G03FA)	0.00896042	0.653905	0.862599	NONE
Observed	Medications	Progestogens (G03D)	-0.00873873	0.661929	0.866186	NONE
Observed	Medications	Alprazolam (N05BA12)	-0.00855311	0.668678	0.868232	NONE
Observed	Medications	Adrenergics in combination with corticosteroids or other drugs, excl. anticholinergics (R03AK)	-0.00825523	0.679564	0.877496	NONE
Observed	Medications	Vilanterol+fluticasone furoate (R03AK10)	0.00808124	0.685955	0.877496	NONE
Observed	Medications	Vitamin b12 and folic acid (B03B)	0.00738033	0.711919	0.88278	NONE
Observed	Medications	Dihydropyridine derivatives (C08CA)	-0.00742623	0.710208	0.88278	NONE
Observed	Medications	Pregabalin (N03AX16)	0.00741219	0.710731	0.88278	NONE
Observed	Medications	Other immunosuppressants (L04AX)	0.00759902	0.703781	0.88278	NONE
Observed	Medications	Imidazole derivatives (G01AF)	0.00756409	0.705078	0.88278	NONE
Observed	Medications	Angiotensin ii antagonists, plain (C09CA)	-0.00708817	0.722844	0.889988	NONE
Observed	Medications	Esomeprazole (A02BC05)	-0.00632644	0.751588	0.908515	NONE
Observed	Medications	Apixaban (B01AF02)	0.00609671	0.760327	0.908515	NONE
Observed	Medications	Benzodiazepine derivatives (N05BA)	0.00576576	0.77297	0.908515	NONE
Observed	Medications	Dexamethasone+tobramycin (S01CA81)	-0.00607659	0.761094	0.908515	NONE
Observed	Medications	Diazepam (N05BA01)	0.00643094	0.747623	0.908515	NONE
Observed	Medications	Candesartan (C09CA06)	-0.00584335	0.77	0.908515	NONE
Observed	Medications	Antiinfectives for treatment of acne (D10AF)	0.0052521	0.792712	0.913355	NONE
Observed	Medications	Fluocortolone+lidocaine (C05AA84)	0.00537764	0.787874	0.913355	NONE
Observed	Medications	Perindopril (C09AA04)	0.00517977	0.795503	0.913355	NONE
Observed	Medications	Betamethasone+fusidic acid (D07CC80)	-0.0048187	0.809474	0.920869	NONE
Observed	Medications	Perindopril+amlodipine (C09BB04)	0.00450331	0.821727	0.92631	NONE
Observed	Medications	Levothyroxine sodium (H03AA01)	-0.00429073	0.830011	0.931342	NONE
Observed	Medications	Bupropione (N06AX12)	0.00419619	0.833701	0.931342	NONE
Observed	Medications	Ibuprofen (M01AE01)	-0.00372146	0.852285	0.940354	NONE
Observed	Medications	Omeprazole (A02BC01)	-0.00326827	0.870103	0.950597	NONE
Observed	Medications	Prostaglandin analogues (S01EE)	0.00299673	0.880811	0.958075	NONE
Observed	Medications	Telmisartan (C09CA07)	-0.00271068	0.892114	0.96312	NONE
Observed	Medications	Alfuzosin (G04CA01)	-0.00238864	0.904867	0.96312	NONE
Observed	Medications	Ketoprofen (M01AE03)	-0.00246905	0.90168	0.96312	NONE
Observed	Medications	Corticosteroids, potent (group iii) (D07AC)	0.00241051	0.904	0.96312	NONE
Observed	Medications	Propionic acid derivatives (M01AE)	0.00208185	0.917038	0.971904	NONE
Observed	Medications	Diclofenac (M01AB05)	-0.00169767	0.932307	0.980368	NONE
Observed	Medications	Venlafaxine (N06AX16)	-0.00168199	0.932931	0.980368	NONE
Observed	Medications	Drospirenone+ethinylestradiol (G03AA12)	-0.00123849	0.950588	0.983991	NONE
Observed	Medications	Tizanidine (M03BX02)	0.00133606	0.946701	0.983991	NONE
Observed	Medications	Encephalitis, tick borne, inactivated, whole virus (J07BA01)	-0.00105912	0.957737	0.985556	NONE
Observed	Medications	Propranolol (C07AA05)	0.000934536	0.962705	0.986574	NONE
Observed	Medications	Rosuvastatin (C10AA07)	0.000624978	0.975054	0.988051	NONE
Observed	Medications	Meloxicam (M01AC06)	0.000399141	0.984066	0.988051	NONE
Observed	Medications	Other dermatological preparations (D11A)	0.000513161	0.979516	0.988051	NONE
Observed	Medications	Sildenafil (G04BE03)	0.000591245	0.9764	0.988051	NONE
Observed	Medications	Paroxetine (N06AB05)	-0.000476852	0.980965	0.988051	NONE
Observed	Medications	Betahistine (N07CA01)	-1.3851e-05	0.999447	0.999447	NONE
Observed	Procedures	Coloscopy (last 6 months)	-0.0392216	0.049622	0.279688	NONE
Observed	Procedures	Tonsils removed (N0Y1)	-0.0384726	0.0543355	0.286707	NONE
Observed	Procedures	Cecum removed (N0Y1)	-0.0335522	0.0933641	0.35622	NONE
Observed	Procedures	Anesthesia (last 6 months)	-0.0274078	0.170186	0.508509	NONE
Observed	Procedures	Intensive care (last 6 months)	-0.00369958	0.853144	0.940354	NONE
Observed	Other	Has smoked (N0Y1)	-0.080571	5.39241e-05	0.00668659	NONE
Observed	Other	Has smoked last year (N0Y1)	-0.0933325	0.00274114	0.0424877	NONE
Observed	Other	Does physical exercise (N0Y1)	0.0518962	0.00936658	0.110615	NONE
Observed	Other	Stool consistenct	-0.0525489	0.0239199	0.185379	NONE
Observed	Other	Alcohol consumption frequency	-0.0403317	0.0527553	0.28442	NONE
Observed	Other	Has used alcohol (N0Y1)	-0.0260806	0.191926	0.55346	NONE
Observed	Other	Born by caeserean section (N0Y1)	-0.0261161	0.191588	0.55346	NONE
Observed	Other	Breastmilk in first monthes (N0Y1)	0.0123834	0.535828	0.815248	NONE
Observed	Other	Has pets (N0Y1)	-0.0109401	0.5844	0.830466	NONE
Observed	Other	Birthplace type city (N0Y1)	-0.00936094	0.642603	0.856805	NONE
Observed	Other	Gut emptying frequency	0.00807642	0.686429	0.877496	NONE
Observed	Other	Drinkingwater from well (N0Y1)	0.0069856	0.726902	0.889988	NONE
Observed	Other	Probiotics usage frequency	-0.00535472	0.788922	0.913355	NONE
Observed	Other	Sampling season	#N/A	#N/A	#N/A	NONE
