# Supplementary material for: Gut metagenome associations with extensive digital health data in a volunteer-based Estonian microbiome cohort
Source: Nat Commun. 2022 Feb 15;13:869. doi: 10.1038/s41467-022-28464-9 (PMC8847343; doi:10.1038/s41467-022-28464-9)
Supplement: Supplementary file 7 — Dataset 4 [file 41467_2022_28464_MOESM7_ESM.xlsx]

## Sheet: PERMANOVA_species
factor_group	factor_name	Df	SumsOfSqs	MeanSqs	F.Model	R2	Pr(>F)	FDR
Intrinsic	Waist to hip ratio	1	254403	254403	13.0297	0.00518486	9.999e-05	0.000961442
Intrinsic	Body mass index	1	242921	242921	12.4395	0.00494918	9.999e-05	0.000961442
Intrinsic	Gender (M0F1)	1	146634	146634	7.49388	0.00298383	9.999e-05	0.000961442
Intrinsic	Blood pressure (systolic)	1	93362.5	93362.5	4.76737	0.00192639	9.999e-05	0.000961442
Intrinsic	Age	1	76096.4	76096.4	3.88279	0.00155943	9.999e-05	0.000961442
Dietary	Eating habit	7	173691	24813.1	1.26576	0.00353443	0.00129987	0.0069142
Dietary	Fresh fruit, berries	1	109289	109289	5.58106	0.0022239	9.999e-05	0.000961442
Dietary	Soft drinks	1	71052	71052	3.6256	0.00144583	9.999e-05	0.000961442
Dietary	Porridge, muesli	1	56180.3	56180.3	2.86587	0.00114321	9.999e-05	0.000961442
Dietary	Bread	1	54176.9	54176.9	2.76356	0.00110244	9.999e-05	0.000961442
Dietary	Sweets	1	51047.4	51047.4	2.60376	0.00103876	9.999e-05	0.000961442
Dietary	Meat products (wieners, sausages)	1	47172.7	47172.7	2.40593	0.000959914	0.00019998	0.00172397
Dietary	Fresh vegetables	1	46008.2	46008.2	2.34648	0.000936216	0.00029997	0.00214264
Dietary	Boiled vegetables	1	44839	44839	2.2868	0.000912425	0.00069993	0.00426787
Dietary	Adds salt	1	42831.7	42831.7	2.18433	0.000871577	0.00049995	0.00320481
Dietary	Whitebread	1	41484.8	41484.8	2.11559	0.00084417	0.00079992	0.00476143
Dietary	Compote, jams	1	38762.9	38762.9	1.97667	0.000788783	0.00139986	0.00714214
Dietary	Coffee	1	38447.1	38447.1	1.96055	0.000782356	0.00139986	0.00714214
Dietary	Potatoes	1	35628.7	35628.7	1.81673	0.000725005	0.00219978	0.0103763
Dietary	Meat	1	31147.5	31147.5	1.58809	0.000633818	0.010199	0.036782
Dietary	Fish	1	30900.1	30900.1	1.57546	0.000628782	0.0122988	0.0427041
Dietary	Is Vegan (N0Y1)	1	29155	29155	1.48643	0.000593271	0.0194981	0.0609314
Dietary	Dairy	1	29093.4	29093.4	1.4833	0.00059202	0.0191981	0.0607534
Dietary	Tea	1	26776.9	26776.9	1.36513	0.000544881	0.0388961	0.101292
Dietary	Rice, pasta	1	25832.6	25832.6	1.31696	0.000525666	0.0490951	0.121556
Dietary	Eggs	1	24965.5	24965.5	1.27273	0.000508022	0.0590941	0.135537
Diseases	Essential (primary) hypertension (I10)	1	104136	104136	5.3174	0.00211906	9.999e-05	0.000961442
Diseases	Gout (M10)	1	101598	101598	5.18752	0.00206741	9.999e-05	0.000961442
Diseases	Type 2 diabetes mellitus (E11)	1	95843.1	95843.1	4.8931	0.0019503	9.999e-05	0.000961442
Diseases	Hypertensive heart disease (I11)	1	93698.3	93698.3	4.78339	0.00190666	9.999e-05	0.000961442
Diseases	Acute bronchitis (J20)	1	70404.1	70404.1	3.59249	0.00143265	9.999e-05	0.000961442
Diseases	Other anxiety disorders (F41)	1	61911.7	61911.7	3.15861	0.00125984	9.999e-05	0.000961442
Diseases	Disorders of lipoprotein metabolism and other lipidemias (E78)	1	54010.8	54010.8	2.75508	0.00109906	9.999e-05	0.000961442
Diseases	Irritable bowel syndrome (K58)	1	50846.2	50846.2	2.59349	0.00103467	9.999e-05	0.000961442
Diseases	Gastro-esophageal reflux disease (K21)	1	50583.5	50583.5	2.58007	0.00102932	9.999e-05	0.000961442
Diseases	Candidiasis (B37)	1	49590.3	49590.3	2.52936	0.00100911	0.00029997	0.00214264
Diseases	Self reported mental health status OK (N0Y1)	1	48731.6	48731.6	2.48552	0.000991635	0.00019998	0.00172397
Diseases	Crohn's disease [regional enteritis] (K50)	1	48476.3	48476.3	2.47248	0.000986439	9.999e-05	0.000961442
Diseases	Chronic diseases of tonsils and adenoids (J35)	1	45356.9	45356.9	2.31324	0.000922964	0.00029997	0.00214264
Diseases	Self reported physical health status OK (N0Y1)	1	44893.9	44893.9	2.2896	0.000913541	0.00049995	0.00320481
Diseases	Cholelithiasis (K80)	1	42909.9	42909.9	2.18833	0.00087317	0.00029997	0.00214264
Diseases	Asthma (J45)	1	41427	41427	2.11264	0.000842994	0.0009999	0.00568125
Diseases	Gastritis and duodenitis (K29)	1	41237.7	41237.7	2.10298	0.000839143	0.00039996	0.0027775
Diseases	Age-related cataract (H25)	1	38812.7	38812.7	1.97921	0.000789796	0.00109989	0.0061105
Diseases	Major depressive disorder, single episode (F32)	1	38437	38437	1.96004	0.000782151	0.00179982	0.00882265
Diseases	Calculus of kidney and ureter (N20)	1	36579.2	36579.2	1.86523	0.000744346	0.00279972	0.0122795
Diseases	Major depressive disorder, recurrent (F33)	1	34694.6	34694.6	1.76907	0.000705998	0.00469953	0.0195814
Diseases	Menopausal and other perimenopausal disorders (N95)	1	34260.8	34260.8	1.74693	0.00069717	0.00529947	0.0217191
Diseases	Acute tubulo-interstitial nephritis (N10)	1	33279.5	33279.5	1.69686	0.000677201	0.00729927	0.0280741
Diseases	Has had chickenpox (N0Y1)	1	32596.3	32596.3	1.66217	0.000664427	0.00689931	0.0273782
Diseases	Female genital prolapse (N81)	1	32179	32179	1.64071	0.000654807	0.010299	0.036782
Diseases	Vasomotor and allergic rhinitis (J30)	1	31994.7	31994.7	1.63131	0.000651057	0.00929907	0.034698
Diseases	Acute appendicitis (K35)	1	31956.5	31956.5	1.62936	0.000650281	0.00729927	0.0280741
Diseases	Iron deficiency anemia (D50)	1	31721.1	31721.1	1.61735	0.00064549	0.00829917	0.0314363
Diseases	Polyosteoarthritis (M15)	1	30976.3	30976.3	1.57935	0.000630335	0.0120988	0.0426014
Diseases	Heart failure (I50)	1	29324.8	29324.8	1.4951	0.000596727	0.0172983	0.0569022
Diseases	Ovarian dysfunction (E28)	1	29058.9	29058.9	1.48153	0.000591317	0.0191981	0.0607534
Diseases	Haemorrhoids (I84)	1	28713.4	28713.4	1.46391	0.000584286	0.0206979	0.0621962
Diseases	Eating disorders (F50)	1	28692.3	28692.3	1.46283	0.000583857	0.020298	0.0621962
Diseases	Chronic ischemic heart disease (I25)	1	28384.7	28384.7	1.44714	0.000577598	0.0208979	0.0621962
Diseases	Ulcerative colitis (K51)	1	28325.4	28325.4	1.44411	0.00057639	0.0251975	0.0732485
Diseases	Type 1 diabetes mellitus (E10)	1	26996.9	26996.9	1.37635	0.000549357	0.0354965	0.0964577
Diseases	Acne (L70)	1	26937.7	26937.7	1.37333	0.000548152	0.0338966	0.0941573
Diseases	Chronic tubulo-interstitial nephritis (N11)	1	26543.1	26543.1	1.3532	0.000540123	0.0436956	0.111468
Diseases	Acute pharyngitis (J02)	1	26314.7	26314.7	1.34155	0.000535476	0.0425957	0.109783
Diseases	Parkinson's disease (G20)	1	25712.9	25712.9	1.31085	0.000523228	0.049595	0.121556
Diseases	Female infertility (N97)	1	25495.5	25495.5	1.29976	0.000518806	0.0487951	0.121556
Diseases	Vitamin B12 deficiency anemia (D51)	1	25361	25361	1.2929	0.000516069	0.0562944	0.1355
Diseases	Chronic viral hepatitis (B18)	1	25295.4	25295.4	1.28956	0.000514734	0.059794	0.135896
Diseases	Has seasonable allergy (N0Y1)	1	24995.5	24995.5	1.27449	0.00050974	0.0647935	0.145931
Diseases	Malignant neoplasm of colon (C18)	1	24972.1	24972.1	1.27307	0.000508154	0.0666933	0.146915
Diseases	Atrial fibrillation and flutter (I48)	1	24857.3	24857.3	1.26721	0.000505818	0.0683932	0.147399
Diseases	Chronic kidney disease (CKD) (N18)	1	24764	24764	1.26245	0.000503921	0.0669933	0.146915
Diseases	Epilepsy and recurrent seizures (G40)	1	24485.4	24485.4	1.24824	0.000498251	0.0747925	0.157127
Diseases	Benign neoplasm of colon, rectum, anus and anal canal (D12)	1	24047.3	24047.3	1.2259	0.000489336	0.0866913	0.177646
Diseases	Bipolar disorder (F31)	1	23333.9	23333.9	1.18951	0.000474819	0.111489	0.220254
Diseases	Osteoporosis with current pathological fracture (M80)	1	23301.1	23301.1	1.18784	0.000474152	0.109789	0.219578
Diseases	Glaucoma (H40)	1	23016.2	23016.2	1.17331	0.000468355	0.116288	0.222115
Diseases	Vitamin D deficiency (E55)	1	22890.9	22890.9	1.16692	0.000465805	0.126687	0.237476
Diseases	Endometriosis (N80)	1	22765.3	22765.3	1.16051	0.000463248	0.131587	0.240304
Diseases	Migraine (G43)	1	22681.3	22681.3	1.15623	0.000461539	0.137886	0.244479
Diseases	Lactose intolerance (E73)	1	22003.1	22003.1	1.12164	0.000447739	0.159584	0.277056
Diseases	Other cardiac arrhythmias (I49)	1	21967.4	21967.4	1.11982	0.000447012	0.163084	0.279253
Diseases	Acute tonsillitis (J03)	1	21950	21950	1.11893	0.000446659	0.166983	0.283985
Diseases	Chronic rhinitis, nasopharyngitis and pharyngitis (J31)	1	21891.7	21891.7	1.11596	0.000445472	0.172583	0.285827
Diseases	Atherosclerosis (I70)	1	21714.6	21714.6	1.10693	0.000441869	0.181582	0.294522
Diseases	Psoriasis (L40)	1	21643.2	21643.2	1.10328	0.000440414	0.188381	0.298546
Diseases	Osteoporosis without current pathological fracture (M81)	1	21518	21518	1.0969	0.000437868	0.193381	0.304058
Diseases	Gastric ulcer (K25)	1	20776.5	20776.5	1.05908	0.000422778	0.249575	0.373615
Diseases	Has been diagnosed with gum disease (N0Y1)	1	20722	20722	1.05641	0.000422387	0.257274	0.380583
Diseases	Schizophrenia (F20)	1	20275.5	20275.5	1.03354	0.000412585	0.307369	0.441623
Diseases	Other arthritis (M13)	1	19872.7	19872.7	1.013	0.000404388	0.353465	0.485061
Diseases	Other rheumatoid arthritis (M06)	1	19685.2	19685.2	1.00344	0.000400573	0.374563	0.508598
Diseases	Other and unsp noninfective gastroenteritis and colitis (K52)	1	18847.3	18847.3	0.960706	0.000383522	0.493851	0.611201
Diseases	Atopic dermatitis (L20)	1	18501.6	18501.6	0.943078	0.000376487	0.547245	0.664133
Diseases	Benign neoplasm of mouth and pharynx (D10)	1	16809	16809	0.856773	0.000342045	0.856614	0.88129
Diseases	Rheumatoid arthritis with rheumatoid factor (M05)	1	16479.9	16479.9	0.839991	0.000335347	0.921208	0.936187
Medications	Antibiotics usage history (last 10 years)	1	122955	122955	6.2921	0.00310216	9.999e-05	0.000961442
Medications	Metoprolol (C07AB02)	1	43303	43303	2.20839	0.000881169	0.00069993	0.00426787
Medications	Antidepressants usage history (last 10 years)	1	36616.2	36616.2	1.86931	0.000824986	0.00259974	0.0120358
Medications	Metformin (A10BA02)	1	39767	39767	2.02792	0.000809216	0.00169983	0.00849915
Medications	Glucocorticoids (H02AB)	1	37539.7	37539.7	1.91425	0.000763892	0.0019998	0.00961442
Medications	Influenza, inactivated, split virus or surface antigen (J07BB02)	1	35172.8	35172.8	1.79347	0.000715729	0.00389961	0.0168087
Medications	Gabapentin (N03AX12)	1	35048.4	35048.4	1.78712	0.000713196	0.00279972	0.0122795
Medications	Nebivolol (C07AB12)	1	33853.2	33853.2	1.72614	0.000688876	0.0039996	0.0169475
Medications	Simvastatin (C10AA01)	1	33273.5	33273.5	1.69656	0.000677079	0.00639936	0.0258039
Medications	Dopaminergic agents (N04B)	1	30215.5	30215.5	1.54054	0.000614852	0.0127987	0.0438312
Medications	Blood glucose lowering drugs, excl. insulins (A10B)	1	30199.9	30199.9	1.53974	0.000614534	0.0131987	0.0439956
Medications	Insulins and analogues for injection, long-acting (A10AE)	1	29769.7	29769.7	1.51779	0.00060578	0.0176982	0.0574618
Medications	Telmisartan (C09CA07)	1	29713.4	29713.4	1.51492	0.000604635	0.0130987	0.0439956
Medications	Tramadol (N02AX02)	1	28197.1	28197.1	1.43757	0.000573781	0.0269973	0.0775784
Medications	Telmisartan+amlodipine (C09DB04)	1	28172.9	28172.9	1.43634	0.000573287	0.0290971	0.0817334
Medications	Estradiol (G03CA03)	1	27619.8	27619.8	1.40812	0.000562033	0.0288971	0.0817334
Medications	Dihydropyridine derivatives (C08CA)	1	27188.6	27188.6	1.38612	0.000553258	0.0345965	0.0950454
Medications	Venlafaxine (N06AX16)	1	26937	26937	1.37329	0.000548138	0.0387961	0.101292
Medications	Esomeprazole (A02BC05)	1	26864.5	26864.5	1.36959	0.000546662	0.0376962	0.101292
Medications	Tamsulosin+dutasteride (G04CA52)	1	26684.1	26684.1	1.36039	0.000542992	0.0388961	0.101292
Medications	Levothyroxine sodium (H03AA01)	1	25873.4	25873.4	1.31904	0.000526495	0.0491951	0.121556
Medications	Drugs for urinary frequency and incontinence (G04BD)	1	25414.5	25414.5	1.29563	0.000517156	0.0579942	0.1355
Medications	Telmisartan+hydrochlorothiazide (C09DA07)	1	25385	25385	1.29413	0.000516556	0.0569943	0.1355
Medications	Diclofenac (M01AB05)	1	25347.3	25347.3	1.29221	0.00051579	0.0567943	0.1355
Medications	Naproxen+esomeprazole (M01AE52)	1	25247	25247	1.28709	0.000513749	0.0576942	0.1355
Medications	Alfuzosin (G04CA01)	1	24954.9	24954.9	1.27219	0.000507804	0.0669933	0.146915
Medications	Alprazolam (N05BA12)	1	24947.5	24947.5	1.27181	0.000507654	0.069693	0.148917
Medications	Vitamin b12 and folic acid (B03B)	1	24874.1	24874.1	1.26807	0.000506161	0.0680932	0.147399
Medications	Imidazole derivatives (G01AF)	1	24622.9	24622.9	1.25526	0.000501049	0.0708929	0.150197
Medications	Antithrombotic agents (B01A)	1	24347.6	24347.6	1.24121	0.000495446	0.080092	0.165479
Medications	Progestogens (G03D)	1	23833.2	23833.2	1.21498	0.000484979	0.0955904	0.193126
Medications	Omeprazole (A02BC01)	1	23574.1	23574.1	1.20176	0.000479707	0.0957904	0.193126
Medications	Drospirenone+ethinylestradiol (G03AA12)	1	23346.6	23346.6	1.19016	0.000475077	0.111889	0.220254
Medications	Trimetazidine (C01EB15)	1	23271	23271	1.18631	0.00047354	0.115588	0.222115
Medications	Latanoprost (S01EE01)	1	23223.2	23223.2	1.18387	0.000472567	0.114289	0.222115
Medications	Non-selective monoamine reuptake inhibitors (N06AA)	1	23205.1	23205.1	1.18294	0.000472198	0.116388	0.222115
Medications	Other immunosuppressants (L04AX)	1	22970.2	22970.2	1.17096	0.000467419	0.122388	0.231795
Medications	Tamsulosin (G04CA02)	1	22911.8	22911.8	1.16798	0.000466229	0.127287	0.237476
Medications	Pantoprazole (A02BC02)	1	22816.5	22816.5	1.16313	0.000464291	0.130887	0.240304
Medications	Pseudoephedrine+cetirizine (R01BA93)	1	22800.3	22800.3	1.1623	0.000463961	0.131687	0.240304
Medications	Aminosalicylic acid and similar agents (A07EC)	1	22747.3	22747.3	1.15959	0.000462882	0.137486	0.244479
Medications	Antiinfectives and antiseptics, excl. combinations with corticosteroids (G01A)	1	22710.6	22710.6	1.15773	0.000462137	0.136886	0.244479
Medications	Beta blocking agents (C07A)	1	22544.9	22544.9	1.14927	0.000458765	0.136886	0.244479
Medications	Gonadotropins and other ovulation stimulants (G03G)	1	22435.8	22435.8	1.14371	0.000456544	0.148785	0.261338
Medications	Indapamide (C03BA11)	1	22291.6	22291.6	1.13635	0.00045361	0.149485	0.261338
Medications	Quetiapine (N05AH04)	1	22163.7	22163.7	1.12983	0.000451007	0.161984	0.279253
Medications	Allopurinol (M04AA01)	1	22036.5	22036.5	1.12334	0.000448419	0.168483	0.2846
Medications	Alendronic acid+colecalciferol (M05BB03)	1	22010.9	22010.9	1.12204	0.000447899	0.173783	0.285827
Medications	Dienogest+ethinylestradiol (G03AA16)	1	21912.9	21912.9	1.11704	0.000445903	0.176082	0.287716
Medications	Sildenafil (G04BE03)	1	21875.1	21875.1	1.11511	0.000445134	0.173783	0.285827
Medications	Agomelatine (N06AX22)	1	21833	21833	1.11297	0.000444278	0.183782	0.294522
Medications	Fluticasone furoate (R01AD12)	1	21751.1	21751.1	1.10879	0.000442612	0.173283	0.285827
Medications	Angiotensin ii antagonists and diuretics (C09DA)	1	21714.5	21714.5	1.10692	0.000441865	0.182682	0.294522
Medications	Ace inhibitors and diuretics (C09BA)	1	21577.9	21577.9	1.09996	0.000439088	0.188681	0.298546
Medications	Antiinflammatory and antirheumatic products, non-steroids (M01A)	1	21564.4	21564.4	1.09927	0.000438812	0.19808	0.3095
Medications	Encephalitis, tick borne, inactivated, whole virus (J07BA01)	1	21309.3	21309.3	1.08626	0.00043362	0.210579	0.325581
Medications	Prostaglandin analogues (S01EE)	1	21291.7	21291.7	1.08536	0.000433264	0.212279	0.325581
Medications	Betahistine (N07CA01)	1	21250.1	21250.1	1.08324	0.000432417	0.212179	0.325581
Medications	Progestogens and estrogens, fixed combinations (G03FA)	1	21241.9	21241.9	1.08282	0.00043225	0.217978	0.332284
Medications	Perindopril+amlodipine+indapamide (C09BX01)	1	21088.2	21088.2	1.07498	0.000429121	0.220878	0.334664
Medications	Corticosteroids (R01AD)	1	20882	20882	1.06447	0.000424926	0.246075	0.370595
Medications	Benzodiazepine derivatives (N05BA)	1	20841.1	20841.1	1.06238	0.000424093	0.260674	0.383344
Medications	Perindopril+amlodipine (C09BB04)	1	20818.3	20818.3	1.06122	0.00042363	0.251475	0.374219
Medications	Zolpidem (N05CF02)	1	20491.5	20491.5	1.04455	0.00041698	0.284472	0.415894
Medications	Perindopril+indapamide (C09BA04)	1	20347.6	20347.6	1.03721	0.000414051	0.292271	0.424812
Medications	Atorvastatin (C10AA05)	1	20240.2	20240.2	1.03174	0.000411866	0.305669	0.441623
Medications	Antiepileptics (N03A)	1	20187.8	20187.8	1.02906	0.000410799	0.318568	0.452512
Medications	Desogestrel (G03AC09)	1	20162	20162	1.02775	0.000410274	0.316268	0.451812
Medications	Warfarin (B01AA03)	1	20047.7	20047.7	1.02192	0.000407949	0.328167	0.460909
Medications	Mebeverine (A03AA04)	1	20033.2	20033.2	1.02118	0.000407654	0.323268	0.456593
Medications	Lornoxicam (M01AC05)	1	20002.4	20002.4	1.01961	0.000407027	0.348765	0.484396
Medications	Gestodene+ethinylestradiol (G03AA10)	1	19935.1	19935.1	1.01618	0.000405658	0.339666	0.474394
Medications	Glucosamine (M01AX05)	1	19841.7	19841.7	1.01141	0.000403757	0.355064	0.485061
Medications	Apixaban (B01AF02)	1	19808.7	19808.7	1.00974	0.000403086	0.354365	0.485061
Medications	Selective serotonin reuptake inhibitors (N06AB)	1	19636.8	19636.8	1.00097	0.000399588	0.376362	0.508598
Medications	Enalapril (C09AA02)	1	19607.1	19607.1	0.999452	0.000398983	0.382462	0.514061
Medications	Rivaroxaban (B01AF01)	1	19551.2	19551.2	0.996601	0.000397845	0.389961	0.52056
Medications	Ramipril (C09AA05)	1	19451.4	19451.4	0.991511	0.000395814	0.391461	0.52056
Medications	Other antidepressants (N06AX)	1	19368.5	19368.5	0.987284	0.000394127	0.412459	0.54558
Medications	Fluconazole (J02AC01)	1	19365	19365	0.987109	0.000394057	0.425757	0.560207
Medications	Mometasone (D07AC13)	1	19290.6	19290.6	0.983314	0.000392543	0.431857	0.560436
Medications	Timolol (S01ED01)	1	19264.9	19264.9	0.982003	0.00039202	0.428257	0.560436
Medications	Beta blocking agents (S01ED)	1	19240.3	19240.3	0.980747	0.000391519	0.442256	0.569917
Medications	Rosuvastatin (C10AA07)	1	19232.6	19232.6	0.980357	0.000391363	0.432657	0.560436
Medications	Ketoprofen (M01AE03)	1	19175.5	19175.5	0.977444	0.000390201	0.452155	0.574691
Medications	Amlodipine (C08CA01)	1	19135.6	19135.6	0.975407	0.000389388	0.448355	0.574691
Medications	Dexamethasone+tobramycin (S01CA81)	1	19107.9	19107.9	0.973995	0.000388824	0.457254	0.574691
Medications	Adrenergics, inhalants (R03A)	1	19072.1	19072.1	0.972171	0.000388097	0.457454	0.574691
Medications	Direct acting antivirals (J05A)	1	19045	19045	0.970786	0.000387544	0.453955	0.574691
Medications	Perindopril (C09AA04)	1	18896.6	18896.6	0.963221	0.000384525	0.487951	0.606904
Medications	Torasemide (C03CA04)	1	18869.7	18869.7	0.96185	0.000383978	0.481752	0.60219
Medications	Other antihistamines for systemic use (R06AX)	1	18643	18643	0.950288	0.000379364	0.531347	0.65116
Medications	Mometasone (R01AD09)	1	18541.7	18541.7	0.945122	0.000377303	0.545545	0.664133
Medications	Lipase+amylase+protease (A09AA02)	1	18515.5	18515.5	0.943787	0.00037677	0.558244	0.670967
Medications	Antibiotics (S01AA)	1	18478.3	18478.3	0.941892	0.000376013	0.557744	0.670967
Medications	Celecoxib (M01AH01)	1	18422.6	18422.6	0.93905	0.000374879	0.565643	0.676607
Medications	N02AJ06	1	18398.8	18398.8	0.937838	0.000374396	0.570743	0.679456
Medications	Corticosteroids, combinations with antiseptics (D07B)	1	18374	18374	0.936575	0.000373892	0.580042	0.6808
Medications	Propafenone (C01BC03)	1	18367	18367	0.936214	0.000373748	0.576942	0.680356
Medications	Organic nitrates (C01DA)	1	18352.1	18352.1	0.935456	0.000373445	0.575242	0.680356
Medications	Sertraline (N06AB06)	1	18231.2	18231.2	0.929294	0.000370986	0.606939	0.708069
Medications	Escitalopram (N06AB10)	1	18213	18213	0.928362	0.000370614	0.608939	0.708069
Medications	Corticosteroids, potent (group iii) (D07AC)	1	18131	18131	0.924179	0.000368945	0.626237	0.721472
Medications	Opioids (N02A)	1	18128	18128	0.924031	0.000368886	0.625037	0.721472
Medications	Antifungals for topical use (D01A)	1	18023.7	18023.7	0.91871	0.000366763	0.637436	0.731005
Medications	Formoterol+budesonide (R03AK07)	1	18020.5	18020.5	0.918549	0.000366698	0.644136	0.735315
Medications	Angiotensin ii antagonists, plain (C09CA)	1	17967.7	17967.7	0.915853	0.000365622	0.658634	0.748448
Medications	Tizanidine (M03BX02)	1	17865.8	17865.8	0.910661	0.00036355	0.662034	0.748907
Medications	Etoricoxib (M01AH05)	1	17782.4	17782.4	0.906406	0.000361852	0.69843	0.776034
Medications	Betamethasone+fusidic acid (D07CC80)	1	17758.8	17758.8	0.905203	0.000361372	0.689331	0.772793
Medications	Fluocortolone+lidocaine (C05AA84)	1	17702.3	17702.3	0.90232	0.000360222	0.708229	0.779988
Medications	Pregabalin (N03AX16)	1	17699.6	17699.6	0.902185	0.000360168	0.69673	0.776034
Medications	Other dermatological preparations (D11A)	1	17692.8	17692.8	0.901836	0.000360028	0.70253	0.777135
Medications	Candesartan (C09CA06)	1	17664.6	17664.6	0.900398	0.000359454	0.714529	0.781335
Medications	Dexamethasone+chloramphenicol (S01CA82)	1	17641.3	17641.3	0.89921	0.000358981	0.718828	0.781335
Medications	Diazepam (N05BA01)	1	17615.4	17615.4	0.897893	0.000358455	0.717828	0.781335
Medications	Duloxetine (N06AX21)	1	17610.7	17610.7	0.897651	0.000358358	0.728027	0.786139
Medications	Levonorgestrel (G02BA03)	1	17593.3	17593.3	0.896764	0.000358004	0.733327	0.786139
Medications	Sumatriptan (N02CC01)	1	17528.4	17528.4	0.893456	0.000356684	0.735126	0.786139
Medications	Progestogens and estrogens, fixed combinations (G03AA)	1	17463.1	17463.1	0.890127	0.000355356	0.748225	0.795984
Medications	Adrenergics in combination with corticosteroids or other drugs, excl. anticholinergics (R03AK)	1	17459.6	17459.6	0.889946	0.000355283	0.735826	0.786139
Medications	Ibuprofen (M01AE01)	1	17412.7	17412.7	0.887553	0.000354328	0.754425	0.799179
Medications	Bupropione (N06AX12)	1	17381	17381	0.885941	0.000353685	0.766723	0.805382
Medications	Lercanidipine (C08CA13)	1	17358.6	17358.6	0.884795	0.000353228	0.766723	0.805382
Medications	Zopiclone (N05CF01)	1	17301.2	17301.2	0.88187	0.00035206	0.792821	0.82931
Medications	Propranolol (C07AA05)	1	17125.5	17125.5	0.87291	0.000348485	0.809019	0.842728
Medications	Valaciclovir (J05AB11)	1	16924.5	16924.5	0.862663	0.000344395	0.853815	0.88129
Medications	Paroxetine (N06AB05)	1	16841.1	16841.1	0.858409	0.000342698	0.847415	0.879061
Medications	Meloxicam (M01AC06)	1	16701.3	16701.3	0.851279	0.000339852	0.877812	0.899398
Medications	Antiinfectives for treatment of acne (D10AF)	1	16657.7	16657.7	0.84906	0.000338967	0.886311	0.904399
Medications	Isoconazole+diflucortolone (D01AC80)	1	16075.7	16075.7	0.819382	0.000327122	0.948305	0.959823
Medications	Vilanterol+fluticasone furoate (R03AK10)	1	15929.2	15929.2	0.811912	0.000324141	0.957104	0.964823
Medications	Propionic acid derivatives (M01AE)	1	15590.5	15590.5	0.794647	0.00031725	0.981102	0.984002
Medications	Cetirizine (R06AE07)	1	15523.6	15523.6	0.791236	0.000315889	0.984002	0.984002
Procedures	Cecum removed (N0Y1)	1	64899.4	64899.4	3.31158	0.00132288	9.999e-05	0.000961442
Procedures	Anesthesia (last 6 months)	1	45495.1	45495.1	2.32029	0.000925776	0.00019998	0.00172397
Procedures	Coloscopy (last 6 months)	1	42684.6	42684.6	2.17683	0.000868584	0.00029997	0.00214264
Procedures	Tonsils removed (N0Y1)	1	35606.6	35606.6	1.81579	0.000725788	0.00269973	0.0122715
Procedures	Intensive care (last 6 months)	1	18732.6	18732.6	0.954861	0.000381189	0.513149	0.631957
Other	Gut emptying frequency	6	505840	84306.6	4.33209	0.0103145	9.999e-05	0.000961442
Other	Stool consistency	2	451907	225954	11.6119	0.00945895	9.999e-05	0.000961442
Other	Has smoked last year (N0Y1)	1	48634.8	48634.8	2.49901	0.00242977	0.00029997	0.00214264
Other	Probiotics usage frequency	4	107573	26893.3	1.37182	0.00219272	0.00129987	0.0069142
Other	Has smoked (N0Y1)	1	89771.4	89771.4	4.58255	0.00182675	9.999e-05	0.000961442
Other	Sampling season	3	76294.2	25431.4	1.29659	0.00156348	0.00989901	0.0363934
Other	Alcohol consumption frequency	2	69338.2	34669.1	1.77099	0.00153496	0.00049995	0.00320481
Other	Does physical exercise (N0Y1)	1	62822.4	62822.4	3.20513	0.00127837	9.999e-05	0.000961442
Other	Drinking water origin from well (N0Y1)	1	39630	39630	2.02113	0.0008078	0.00089991	0.00523203
Other	Born by caeserean section (N0Y1)	1	28900.4	28900.4	1.4736	0.000589091	0.0208979	0.0621962
Other	Has used alcohol (N0Y1)	1	28226.3	28226.3	1.43915	0.000574638	0.0250975	0.0732485
Other	Has pets (N0Y1)	1	25469.6	25469.6	1.29857	0.00051916	0.0586941	0.135537
Other	Birthplace type city (N0Y1)	1	24239.8	24239.8	1.23689	0.000502956	0.0758924	0.158109
Other	Breastmilk in first monthes (N0Y1)	1	17818.6	17818.6	0.908343	0.000363205	0.684032	0.770306

## Sheet: PERMANOVA_KEGGko
factor_group	factor_name	Df	SumsOfSqs	MeanSqs	F.Model	R2	Pr(>F)	FDR	adjusted
Intrinsic	Age	1	215115	215115	24.4695	0.00974697	9.999e-05	0.000781172	NONE
Intrinsic	Waist to hip ratio	1	144281	144281	16.3569	0.00650022	9.999e-05	0.000781172	NONE
Intrinsic	Body mass index	1	117380	117380	13.2893	0.00528553	9.999e-05	0.000781172	NONE
Intrinsic	Blood pressure (systolic)	1	60037.1	60037.1	6.77996	0.00273741	9.999e-05	0.000781172	NONE
Intrinsic	Gender (M0F1)	1	59928.3	59928.3	6.76939	0.00269614	9.999e-05	0.000781172	NONE
Dietary	Eating habit	7	71476.9	10211	1.15125	0.00321571	0.121488	0.20248	NONE
Dietary	Sweets	1	56728.6	56728.6	6.40703	0.00255219	9.999e-05	0.000781172	NONE
Dietary	Fresh fruit, berries	1	40947	40947	4.62133	0.00184218	0.00019998	0.00128192	NONE
Dietary	Porridge, muesli	1	36287.1	36287.1	4.09455	0.00163253	9.999e-05	0.000781172	NONE
Dietary	Bread	1	33208.9	33208.9	3.74671	0.00149405	9.999e-05	0.000781172	NONE
Dietary	Whitebread	1	32685.2	32685.2	3.68753	0.00147049	0.00019998	0.00128192	NONE
Dietary	Soft drinks	1	30729.9	30729.9	3.46663	0.00138252	0.00019998	0.00128192	NONE
Dietary	Rice, pasta	1	28602.3	28602.3	3.2263	0.0012868	0.00059994	0.0029997	NONE
Dietary	Compote, jams	1	27407.2	27407.2	3.09133	0.00123303	0.00089991	0.0040905	NONE
Dietary	Coffee	1	27147.7	27147.7	3.06203	0.00122136	0.0009999	0.00430991	NONE
Dietary	Boiled vegetables	1	25693.7	25693.7	2.89784	0.00115595	0.00119988	0.0049995	NONE
Dietary	Fish	1	24851.7	24851.7	2.80277	0.00111806	0.0019998	0.00781172	NONE
Dietary	Potatoes	1	22189.2	22189.2	2.50219	0.000998281	0.00279972	0.0107682	NONE
Dietary	Meat products (wieners, sausages)	1	19961.4	19961.4	2.25074	0.000898052	0.00739926	0.0246642	NONE
Dietary	Adds salt	1	17490.9	17490.9	1.97197	0.000786908	0.0161984	0.0460181	NONE
Dietary	Meat	1	14295.6	14295.6	1.61149	0.000643153	0.0537946	0.117971	NONE
Dietary	Fresh vegetables	1	13879.3	13879.3	1.56453	0.000624424	0.0630937	0.132278	NONE
Dietary	Tea	1	13215.5	13215.5	1.48966	0.000594558	0.080092	0.151689	NONE
Dietary	Is Vegan (N0Y1)	1	12273.2	12273.2	1.38338	0.000552165	0.112889	0.194636	NONE
Dietary	Dairy	1	11519.9	11519.9	1.29844	0.000518276	0.148385	0.23331	NONE
Dietary	Eggs	1	10834.7	10834.7	1.22117	0.000487449	0.193881	0.291989	NONE
Diseases	Type 2 diabetes mellitus (E11)	1	245007	245007	27.9085	0.0110227	9.999e-05	0.000781172	NONE
Diseases	Hypertensive heart disease (I11)	1	172238	172238	19.5548	0.00774891	9.999e-05	0.000781172	NONE
Diseases	Age-related cataract (H25)	1	105867	105867	11.9834	0.00476291	9.999e-05	0.000781172	NONE
Diseases	Essential (primary) hypertension (I10)	1	95317.4	95317.4	10.7841	0.00428828	9.999e-05	0.000781172	NONE
Diseases	Disorders of lipoprotein metabolism and other lipidemias (E78)	1	64726.4	64726.4	7.31296	0.00291201	9.999e-05	0.000781172	NONE
Diseases	Chronic ischemic heart disease (I25)	1	61750.6	61750.6	6.97581	0.00277813	9.999e-05	0.000781172	NONE
Diseases	Heart failure (I50)	1	61302.5	61302.5	6.92504	0.00275797	9.999e-05	0.000781172	NONE
Diseases	Vitamin B12 deficiency anemia (D51)	1	55444.8	55444.8	6.26168	0.00249443	9.999e-05	0.000781172	NONE
Diseases	Type 1 diabetes mellitus (E10)	1	53286.8	53286.8	6.01737	0.00239734	9.999e-05	0.000781172	NONE
Diseases	Female genital prolapse (N81)	1	47610	47610	5.37495	0.00214195	9.999e-05	0.000781172	NONE
Diseases	Menopausal and other perimenopausal disorders (N95)	1	46349.8	46349.8	5.23239	0.00208525	9.999e-05	0.000781172	NONE
Diseases	Self reported physical health status OK (N0Y1)	1	42155.6	42155.6	4.75801	0.00189656	9.999e-05	0.000781172	NONE
Diseases	Gout (M10)	1	39628.1	39628.1	4.47222	0.00178285	0.00029997	0.00178554	NONE
Diseases	Atrial fibrillation and flutter (I48)	1	35006.9	35006.9	3.94987	0.00157494	0.00019998	0.00128192	NONE
Diseases	Glaucoma (H40)	1	33208.1	33208.1	3.74661	0.00149402	0.00029997	0.00178554	NONE
Diseases	Cholelithiasis (K80)	1	33044.9	33044.9	3.72817	0.00148667	0.00039996	0.0022725	NONE
Diseases	Atherosclerosis (I70)	1	32863.1	32863.1	3.70763	0.0014785	0.00059994	0.0029997	NONE
Diseases	Polyosteoarthritis (M15)	1	31954.9	31954.9	3.60502	0.00143763	9.999e-05	0.000781172	NONE
Diseases	Gastric ulcer (K25)	1	31165.4	31165.4	3.51582	0.00140211	0.00049995	0.00265931	NONE
Diseases	Gastritis and duodenitis (K29)	1	30894.1	30894.1	3.48517	0.00138991	0.00049995	0.00265931	NONE
Diseases	Acute bronchitis (J20)	1	30654.7	30654.7	3.45814	0.00137914	0.00029997	0.00178554	NONE
Diseases	Chronic diseases of tonsils and adenoids (J35)	1	30345.1	30345.1	3.42316	0.00136521	0.00049995	0.00265931	NONE
Diseases	Other rheumatoid arthritis (M06)	1	29473.3	29473.3	3.32468	0.00132599	0.00079992	0.00384577	NONE
Diseases	Chronic kidney disease (CKD) (N18)	1	27197.9	27197.9	3.0677	0.00122362	0.00159984	0.00655672	NONE
Diseases	Calculus of kidney and ureter (N20)	1	27192	27192	3.06703	0.00122335	0.00089991	0.0040905	NONE
Diseases	Osteoporosis without current pathological fracture (M81)	1	26842.1	26842.1	3.02751	0.00120761	0.0009999	0.00430991	NONE
Diseases	Irritable bowel syndrome (K58)	1	26752.8	26752.8	3.01743	0.00120359	0.00089991	0.0040905	NONE
Diseases	Self reported mental health status OK (N0Y1)	1	24650.4	24650.4	2.78004	0.00110901	0.00169983	0.00685415	NONE
Diseases	Crohn's disease [regional enteritis] (K50)	1	24321.1	24321.1	2.74286	0.00109419	0.00349965	0.0126799	NONE
Diseases	Other anxiety disorders (F41)	1	24167	24167	2.72546	0.00108726	0.0019998	0.00781172	NONE
Diseases	Gastro-esophageal reflux disease (K21)	1	23221.4	23221.4	2.61871	0.00104472	0.00289971	0.0108198	NONE
Diseases	Acne (L70)	1	22432.4	22432.4	2.52964	0.00100922	0.00289971	0.0108198	NONE
Diseases	Has had chickenpox (N0Y1)	1	22193.4	22193.4	2.50285	0.00100014	0.0029997	0.0110283	NONE
Diseases	Asthma (J45)	1	22106.9	22106.9	2.49291	0.00099458	0.00449955	0.0158435	NONE
Diseases	Vitamin D deficiency (E55)	1	20297.2	20297.2	2.28864	0.000913159	0.00919908	0.0302601	NONE
Diseases	Candidiasis (B37)	1	18679.4	18679.4	2.10607	0.000840375	0.0148985	0.0443408	NONE
Diseases	Has been diagnosed with gum disease (N0Y1)	1	18289.4	18289.4	2.06221	0.000824204	0.0156984	0.0451104	NONE
Diseases	Chronic tubulo-interstitial nephritis (N11)	1	18171	18171	2.0487	0.000817501	0.0156984	0.0451104	NONE
Diseases	Malignant neoplasm of colon (C18)	1	18086.2	18086.2	2.03914	0.000813689	0.0185981	0.0505384	NONE
Diseases	Osteoporosis with current pathological fracture (M80)	1	17928.2	17928.2	2.0213	0.000806579	0.0137986	0.042069	NONE
Diseases	Acute pharyngitis (J02)	1	17539.3	17539.3	1.97742	0.000789083	0.0184982	0.0505384	NONE
Diseases	Parkinson's disease (G20)	1	17435.8	17435.8	1.96574	0.000784426	0.0211979	0.0563773	NONE
Diseases	Other cardiac arrhythmias (I49)	1	16513.8	16513.8	1.86172	0.000742946	0.0270973	0.0684275	NONE
Diseases	Haemorrhoids (I84)	1	16304.5	16304.5	1.83811	0.000733529	0.0261974	0.067519	NONE
Diseases	Acute tubulo-interstitial nephritis (N10)	1	15426.3	15426.3	1.73903	0.000694019	0.0356964	0.0858087	NONE
Diseases	Epilepsy and recurrent seizures (G40)	1	14933.9	14933.9	1.68349	0.000671867	0.0453955	0.102242	NONE
Diseases	Ovarian dysfunction (E28)	1	14915.8	14915.8	1.68144	0.000671053	0.0438956	0.10161	NONE
Diseases	Major depressive disorder, single episode (F32)	1	14423.7	14423.7	1.62594	0.000648914	0.0515948	0.114148	NONE
Diseases	Major depressive disorder, recurrent (F33)	1	14220	14220	1.60295	0.000639748	0.0577942	0.124557	NONE
Diseases	Acute appendicitis (K35)	1	14188.9	14188.9	1.59945	0.00063835	0.0553945	0.120423	NONE
Diseases	Acute tonsillitis (J03)	1	13828.1	13828.1	1.55875	0.000622118	0.0687931	0.138186	NONE
Diseases	Endometriosis (N80)	1	13658.3	13658.3	1.53961	0.000614481	0.0661934	0.134539	NONE
Diseases	Chronic rhinitis, nasopharyngitis and pharyngitis (J31)	1	13641.6	13641.6	1.53772	0.000613728	0.0710929	0.139947	NONE
Diseases	Iron deficiency anemia (D50)	1	13462.5	13462.5	1.51752	0.000605673	0.0720928	0.140806	NONE
Diseases	Benign neoplasm of colon, rectum, anus and anal canal (D12)	1	13320.3	13320.3	1.50148	0.000599274	0.0771923	0.147314	NONE
Diseases	Schizophrenia (F20)	1	13286.5	13286.5	1.49766	0.000597751	0.0766923	0.147314	NONE
Diseases	Chronic viral hepatitis (B18)	1	12810.6	12810.6	1.44399	0.00057634	0.0911909	0.16763	NONE
Diseases	Benign neoplasm of mouth and pharynx (D10)	1	12676.7	12676.7	1.42889	0.000570318	0.10259	0.181496	NONE
Diseases	Ulcerative colitis (K51)	1	12137.2	12137.2	1.36804	0.000546044	0.116688	0.198122	NONE
Diseases	Other and unsp noninfective gastroenteritis and colitis (K52)	1	11854	11854	1.33611	0.000533305	0.136186	0.221082	NONE
Diseases	Vasomotor and allergic rhinitis (J30)	1	11549.7	11549.7	1.3018	0.000519616	0.145885	0.230831	NONE
Diseases	Bipolar disorder (F31)	1	11038.3	11038.3	1.24412	0.000496606	0.173383	0.265924	NONE
Diseases	Psoriasis (L40)	1	10685.6	10685.6	1.20435	0.000480738	0.206279	0.303352	NONE
Diseases	Lactose intolerance (E73)	1	10253.1	10253.1	1.15558	0.00046128	0.234177	0.332637	NONE
Diseases	Has seasonable allergy (N0Y1)	1	9175.02	9175.02	1.03431	0.000413718	0.348065	0.465328	NONE
Diseases	Migraine (G43)	1	9169.9	9169.9	1.03345	0.000412549	0.353765	0.467943	NONE
Diseases	Female infertility (N97)	1	8826.42	8826.42	0.994723	0.000397096	0.387861	0.505028	NONE
Diseases	Eating disorders (F50)	1	7690.07	7690.07	0.866614	0.000345972	0.578542	0.688741	NONE
Diseases	Other arthritis (M13)	1	7228.16	7228.16	0.814543	0.000325191	0.674333	0.752603	NONE
Diseases	Rheumatoid arthritis with rheumatoid factor (M05)	1	6580.9	6580.9	0.741581	0.000296071	0.79712	0.840844	NONE
Diseases	Atopic dermatitis (L20)	1	6253.91	6253.91	0.704723	0.00028136	0.857114	0.889123	NONE
Medications	Antibiotics usage history (last 10 years)	1	74618.7	74618.7	8.64074	0.00425518	9.999e-05	0.000781172	NONE
Medications	Metformin (A10BA02)	1	85010.9	85010.9	9.61355	0.00382459	9.999e-05	0.000781172	NONE
Medications	Blood glucose lowering drugs, excl. insulins (A10B)	1	58712.8	58712.8	6.63172	0.00264146	9.999e-05	0.000781172	NONE
Medications	Metoprolol (C07AB02)	1	56275.9	56275.9	6.35577	0.00253182	9.999e-05	0.000781172	NONE
Medications	Insulins and analogues for injection, long-acting (A10AE)	1	41383.8	41383.8	4.67073	0.00186183	0.00019998	0.00128192	NONE
Medications	Dopaminergic agents (N04B)	1	37184.9	37184.9	4.19603	0.00167293	0.00019998	0.00128192	NONE
Medications	Telmisartan (C09CA07)	1	37089.6	37089.6	4.18526	0.00166864	9.999e-05	0.000781172	NONE
Medications	Vitamin b12 and folic acid (B03B)	1	32554.1	32554.1	3.67272	0.00146459	0.00039996	0.0022725	NONE
Medications	Mebeverine (A03AA04)	1	32064.2	32064.2	3.61737	0.00144255	0.00059994	0.0029997	NONE
Medications	Simvastatin (C10AA01)	1	29747.5	29747.5	3.35565	0.00133832	0.00069993	0.00343103	NONE
Medications	Non-selective monoamine reuptake inhibitors (N06AA)	1	24671.7	24671.7	2.78244	0.00110997	0.00419958	0.0149985	NONE
Medications	Zolpidem (N05CF02)	1	21924.1	21924.1	2.47227	0.000986353	0.00519948	0.0180538	NONE
Medications	Ace inhibitors and diuretics (C09BA)	1	21743.2	21743.2	2.45185	0.000978217	0.00589941	0.0202035	NONE
Medications	Esomeprazole (A02BC05)	1	21058.5	21058.5	2.37457	0.000947411	0.00629937	0.0212817	NONE
Medications	Antiinfectives and antiseptics, excl. combinations with corticosteroids (G01A)	1	20608.1	20608.1	2.32373	0.000927146	0.00949905	0.0308411	NONE
Medications	Torasemide (C03CA04)	1	20283.6	20283.6	2.28711	0.000912548	0.0106989	0.0338574	NONE
Medications	Apixaban (B01AF02)	1	20033.7	20033.7	2.2589	0.000901305	0.00989901	0.0317276	NONE
Medications	Other antihistamines for systemic use (R06AX)	1	19172.7	19172.7	2.16174	0.000862571	0.0124988	0.0390586	NONE
Medications	Lercanidipine (C08CA13)	1	18754.2	18754.2	2.11451	0.000843742	0.0164984	0.0463437	NONE
Medications	Gabapentin (N03AX12)	1	18665	18665	2.10444	0.000839727	0.0156984	0.0451104	NONE
Medications	Quetiapine (N05AH04)	1	18561.9	18561.9	2.09282	0.000835092	0.0142986	0.043068	NONE
Medications	Antidepressants usage history (last 10 years)	1	16703.5	16703.5	1.89077	0.000834451	0.0207979	0.0559084	NONE
Medications	Rosuvastatin (C10AA07)	1	18435.6	18435.6	2.07857	0.000829409	0.0134987	0.0416625	NONE
Medications	Levothyroxine sodium (H03AA01)	1	17680.2	17680.2	1.99332	0.000795423	0.0171983	0.047773	NONE
Medications	Drospirenone+ethinylestradiol (G03AA12)	1	16879.6	16879.6	1.90299	0.000759403	0.0239976	0.0631516	NONE
Medications	Pantoprazole (A02BC02)	1	16711.5	16711.5	1.88402	0.000751839	0.0247975	0.0645769	NONE
Medications	Other immunosuppressants (L04AX)	1	16585	16585	1.86976	0.000746151	0.0273973	0.0684932	NONE
Medications	Glucocorticoids (H02AB)	1	16392.9	16392.9	1.84808	0.000737508	0.0264974	0.0675953	NONE
Medications	Amlodipine (C08CA01)	1	15991.2	15991.2	1.80276	0.000719436	0.0313969	0.076206	NONE
Medications	Gestodene+ethinylestradiol (G03AA10)	1	15340	15340	1.7293	0.000690139	0.0406959	0.095981	NONE
Medications	Isoconazole+diflucortolone (D01AC80)	1	15021.5	15021.5	1.69337	0.000675807	0.0449955	0.102242	NONE
Medications	Progestogens and estrogens, fixed combinations (G03AA)	1	15021	15021	1.69331	0.000675786	0.0435956	0.10161	NONE
Medications	Tamsulosin+dutasteride (G04CA52)	1	14982.1	14982.1	1.68892	0.000674035	0.0473953	0.105793	NONE
Medications	Perindopril+amlodipine+indapamide (C09BX01)	1	14780.6	14780.6	1.6662	0.000664973	0.0448955	0.102242	NONE
Medications	Betamethasone+fusidic acid (D07CC80)	1	14000.8	14000.8	1.57823	0.000629887	0.060294	0.128833	NONE
Medications	Naproxen+esomeprazole (M01AE52)	1	13878.1	13878.1	1.56439	0.000624367	0.0634937	0.132278	NONE
Medications	Angiotensin ii antagonists and diuretics (C09DA)	1	13793.8	13793.8	1.55488	0.000620574	0.0661934	0.134539	NONE
Medications	Allopurinol (M04AA01)	1	13666.3	13666.3	1.54051	0.00061484	0.069893	0.138677	NONE
Medications	Influenza, inactivated, split virus or surface antigen (J07BB02)	1	13542.9	13542.9	1.52659	0.00060929	0.0690931	0.138186	NONE
Medications	Mometasone (R01AD09)	1	13416.3	13416.3	1.5123	0.000603591	0.0730927	0.141653	NONE
Medications	Benzodiazepine derivatives (N05BA)	1	13212.7	13212.7	1.48934	0.000594431	0.0820918	0.154308	NONE
Medications	Nebivolol (C07AB12)	1	13135.3	13135.3	1.48061	0.00059095	0.0842916	0.156466	NONE
Medications	Angiotensin ii antagonists, plain (C09CA)	1	13017.9	13017.9	1.46737	0.000585666	0.0844916	0.156466	NONE
Medications	Diazepam (N05BA01)	1	12628.4	12628.4	1.42345	0.000568147	0.10309	0.181496	NONE
Medications	Diclofenac (M01AB05)	1	12607.9	12607.9	1.42113	0.000567223	0.0967903	0.175345	NONE
Medications	Vilanterol+fluticasone furoate (R03AK10)	1	12549.1	12549.1	1.4145	0.000564577	0.10219	0.181496	NONE
Medications	Ibuprofen (M01AE01)	1	12493.7	12493.7	1.40825	0.000562083	0.10299	0.181496	NONE
Medications	Ramipril (C09AA05)	1	12464.4	12464.4	1.40495	0.000560767	0.10429	0.182324	NONE
Medications	Corticosteroids (R01AD)	1	12227.9	12227.9	1.37828	0.000550129	0.113789	0.194844	NONE
Medications	Dihydropyridine derivatives (C08CA)	1	12183.3	12183.3	1.37324	0.000548119	0.112289	0.194636	NONE
Medications	Beta blocking agents (S01ED)	1	12052.3	12052.3	1.35848	0.000542228	0.119688	0.200819	NONE
Medications	Celecoxib (M01AH01)	1	12028.7	12028.7	1.35581	0.000541165	0.123388	0.204284	NONE
Medications	Aminosalicylic acid and similar agents (A07EC)	1	11785.6	11785.6	1.32839	0.000530227	0.129387	0.212808	NONE
Medications	Telmisartan+hydrochlorothiazide (C09DA07)	1	11740.9	11740.9	1.32335	0.000528216	0.137386	0.221591	NONE
Medications	Indapamide (C03BA11)	1	11704.9	11704.9	1.31929	0.000526596	0.136186	0.221082	NONE
Medications	Mometasone (D07AC13)	1	11658.4	11658.4	1.31405	0.000524504	0.142086	0.227366	NONE
Medications	Drugs for urinary frequency and incontinence (G04BD)	1	11529.8	11529.8	1.29955	0.00051872	0.142786	0.227366	NONE
Medications	Perindopril+indapamide (C09BA04)	1	11271.1	11271.1	1.27038	0.000507083	0.164584	0.255565	NONE
Medications	Antibiotics (S01AA)	1	11168.3	11168.3	1.25878	0.000502456	0.168483	0.260005	NONE
Medications	Omeprazole (A02BC01)	1	10956.5	10956.5	1.2349	0.000492927	0.183182	0.27924	NONE
Medications	Pseudoephedrine+cetirizine (R01BA93)	1	10749.2	10749.2	1.21152	0.0004836	0.190981	0.289365	NONE
Medications	Alprazolam (N05BA12)	1	10623.1	10623.1	1.1973	0.000477928	0.20018	0.299671	NONE
Medications	Dienogest+ethinylestradiol (G03AA16)	1	10609.5	10609.5	1.19577	0.000477315	0.205079	0.303352	NONE
Medications	Fluticasone furoate (R01AD12)	1	10552.9	10552.9	1.18939	0.000474769	0.209679	0.304766	NONE
Medications	Telmisartan+amlodipine (C09DB04)	1	10552.7	10552.7	1.18937	0.000474762	0.209479	0.304766	NONE
Medications	Prostaglandin analogues (S01EE)	1	10541.9	10541.9	1.18814	0.000474273	0.20348	0.302797	NONE
Medications	N02AJ06	1	10454	10454	1.17824	0.000470322	0.222378	0.319508	NONE
Medications	Trimetazidine (C01EB15)	1	10431.6	10431.6	1.17571	0.000469312	0.216878	0.313408	NONE
Medications	Betahistine (N07CA01)	1	10268.4	10268.4	1.15731	0.00046197	0.233877	0.332637	NONE
Medications	Organic nitrates (C01DA)	1	10003	10003	1.12738	0.000450029	0.253275	0.354155	NONE
Medications	Antithrombotic agents (B01A)	1	9992.49	9992.49	1.1262	0.000449557	0.253575	0.354155	NONE
Medications	Tramadol (N02AX02)	1	9870.49	9870.49	1.11244	0.000444068	0.269773	0.374685	NONE
Medications	Tamsulosin (G04CA02)	1	9626.51	9626.51	1.08493	0.000433091	0.294071	0.406175	NONE
Medications	Agomelatine (N06AX22)	1	9621.99	9621.99	1.08442	0.000432888	0.29737	0.408476	NONE
Medications	Progestogens (G03D)	1	9517.45	9517.45	1.07263	0.000428185	0.29927	0.408839	NONE
Medications	Lornoxicam (M01AC05)	1	9488.58	9488.58	1.06938	0.000426886	0.315168	0.425903	NONE
Medications	Alendronic acid+colecalciferol (M05BB03)	1	9399.22	9399.22	1.0593	0.000422866	0.321468	0.43208	NONE
Medications	Paroxetine (N06AB05)	1	9372.08	9372.08	1.05624	0.000421645	0.312469	0.42455	NONE
Medications	Warfarin (B01AA03)	1	9063.67	9063.67	1.02147	0.00040777	0.353765	0.467943	NONE
Medications	Fluconazole (J02AC01)	1	9015.8	9015.8	1.01607	0.000405616	0.368363	0.484688	NONE
Medications	Estradiol (G03CA03)	1	8962.63	8962.63	1.01008	0.000403224	0.380662	0.498249	NONE
Medications	Antiepileptics (N03A)	1	8751.54	8751.54	0.986281	0.000393727	0.40026	0.518471	NONE
Medications	Latanoprost (S01EE01)	1	8549.8	8549.8	0.963536	0.000384651	0.432357	0.557161	NONE
Medications	Enalapril (C09AA02)	1	8535.61	8535.61	0.961936	0.000384012	0.442756	0.564739	NONE
Medications	Beta blocking agents (C07A)	1	8509.15	8509.15	0.958953	0.000382822	0.435656	0.558534	NONE
Medications	Progestogens and estrogens, fixed combinations (G03FA)	1	8416.36	8416.36	0.948492	0.000378647	0.447955	0.568471	NONE
Medications	Cetirizine (R06AE07)	1	8361.9	8361.9	0.942353	0.000376197	0.457154	0.577215	NONE
Medications	Perindopril+amlodipine (C09BB04)	1	8275.44	8275.44	0.932605	0.000372307	0.470053	0.590519	NONE
Medications	Venlafaxine (N06AX16)	1	8231.01	8231.01	0.927597	0.000370309	0.481252	0.601549	NONE
Medications	Antiinflammatory and antirheumatic products, non-steroids (M01A)	1	8225.05	8225.05	0.926925	0.000370041	0.485851	0.601549	NONE
Medications	Tizanidine (M03BX02)	1	8221.39	8221.39	0.926512	0.000369876	0.486051	0.601549	NONE
Medications	Encephalitis, tick borne, inactivated, whole virus (J07BA01)	1	8107.74	8107.74	0.913699	0.000364763	0.511349	0.628491	NONE
Medications	Propafenone (C01BC03)	1	8060.57	8060.57	0.908382	0.000362641	0.512849	0.628491	NONE
Medications	Selective serotonin reuptake inhibitors (N06AB)	1	8008.02	8008.02	0.902457	0.000360276	0.519548	0.633595	NONE
Medications	Propranolol (C07AA05)	1	7977.37	7977.37	0.899002	0.000358898	0.523548	0.635373	NONE
Medications	Sumatriptan (N02CC01)	1	7838.25	7838.25	0.883319	0.000352639	0.546845	0.660441	NONE
Medications	Perindopril (C09AA04)	1	7749.35	7749.35	0.873297	0.000348639	0.570243	0.685388	NONE
Medications	Dexamethasone+chloramphenicol (S01CA82)	1	7717.37	7717.37	0.869692	0.0003472	0.575142	0.687969	NONE
Medications	Candesartan (C09CA06)	1	7695.69	7695.69	0.867248	0.000346225	0.585441	0.693651	NONE
Medications	Corticosteroids, combinations with antiseptics (D07B)	1	7573.53	7573.53	0.853476	0.000340729	0.59974	0.705229	NONE
Medications	Levonorgestrel (G02BA03)	1	7552.76	7552.76	0.851135	0.000339795	0.611139	0.705229	NONE
Medications	Fluocortolone+lidocaine (C05AA84)	1	7538.04	7538.04	0.849476	0.000339133	0.610339	0.705229	NONE
Medications	Opioids (N02A)	1	7527.23	7527.23	0.848257	0.000338646	0.611339	0.705229	NONE
Medications	Antifungals for topical use (D01A)	1	7511.01	7511.01	0.846429	0.000337916	0.611339	0.705229	NONE
Medications	Imidazole derivatives (G01AF)	1	7500.16	7500.16	0.845205	0.000337428	0.612139	0.705229	NONE
Medications	Atorvastatin (C10AA05)	1	7443.25	7443.25	0.83879	0.000334868	0.627937	0.720111	NONE
Medications	Desogestrel (G03AC09)	1	7393.01	7393.01	0.833127	0.000332608	0.641536	0.732313	NONE
Medications	Gonadotropins and other ovulation stimulants (G03G)	1	7344.49	7344.49	0.827656	0.000330424	0.644436	0.732313	NONE
Medications	Rivaroxaban (B01AF01)	1	7277.34	7277.34	0.820087	0.000327403	0.662134	0.742302	NONE
Medications	Formoterol+budesonide (R03AK07)	1	7274.53	7274.53	0.819771	0.000327277	0.656034	0.740692	NONE
Medications	Timolol (S01ED01)	1	7273.21	7273.21	0.819622	0.000327218	0.657734	0.740692	NONE
Medications	Escitalopram (N06AB10)	1	7197.94	7197.94	0.811137	0.000323831	0.681632	0.757369	NONE
Medications	Alfuzosin (G04CA01)	1	7148.83	7148.83	0.805601	0.000321622	0.688631	0.76176	NONE
Medications	Sildenafil (G04BE03)	1	7079.28	7079.28	0.797761	0.000318493	0.70313	0.770976	NONE
Medications	Adrenergics in combination with corticosteroids or other drugs, excl. anticholinergics (R03AK)	1	7074.9	7074.9	0.797267	0.000318296	0.69883	0.769637	NONE
Medications	Adrenergics, inhalants (R03A)	1	7007.28	7007.28	0.789644	0.000315254	0.709829	0.774923	NONE
Medications	Lipase+amylase+protease (A09AA02)	1	6997.24	6997.24	0.788513	0.000314802	0.719628	0.778818	NONE
Medications	Etoricoxib (M01AH05)	1	6997.23	6997.23	0.788511	0.000314801	0.713329	0.775357	NONE
Medications	Meloxicam (M01AC06)	1	6882.92	6882.92	0.775625	0.000309659	0.735826	0.792916	NONE
Medications	Other antidepressants (N06AX)	1	6839.1	6839.1	0.770686	0.000307687	0.745625	0.800027	NONE
Medications	Duloxetine (N06AX21)	1	6820.77	6820.77	0.76862	0.000306863	0.752825	0.8043	NONE
Medications	Ketoprofen (M01AE03)	1	6682.86	6682.86	0.753075	0.000300658	0.778022	0.827683	NONE
Medications	Corticosteroids, potent (group iii) (D07AC)	1	6630.06	6630.06	0.747123	0.000298283	0.782122	0.828519	NONE
Medications	Valaciclovir (J05AB11)	1	6471.4	6471.4	0.729239	0.000291145	0.822018	0.859851	NONE
Medications	Dexamethasone+tobramycin (S01CA81)	1	6453.42	6453.42	0.727213	0.000290336	0.820118	0.859851	NONE
Medications	Direct acting antivirals (J05A)	1	6342.16	6342.16	0.714671	0.00028533	0.844216	0.879391	NONE
Medications	Glucosamine (M01AX05)	1	6229.68	6229.68	0.701993	0.00028027	0.863614	0.892163	NONE
Medications	Pregabalin (N03AX16)	1	6044.14	6044.14	0.68108	0.000271923	0.889211	0.913126	NONE
Medications	Bupropione (N06AX12)	1	6018.29	6018.29	0.678166	0.00027076	0.891211	0.913126	NONE
Medications	Zopiclone (N05CF01)	1	5998.56	5998.56	0.675942	0.000269872	0.89991	0.914543	NONE
Medications	Sertraline (N06AB06)	1	5985.08	5985.08	0.674422	0.000269266	0.89991	0.914543	NONE
Medications	Antiinfectives for treatment of acne (D10AF)	1	5888.59	5888.59	0.663547	0.000264925	0.913709	0.924806	NONE
Medications	Propionic acid derivatives (M01AE)	1	5752.78	5752.78	0.648239	0.000258814	0.930607	0.938112	NONE
Medications	Other dermatological preparations (D11A)	1	4948.49	4948.49	0.55759	0.00022263	0.993401	0.993401	NONE
Procedures	Cecum removed (N0Y1)	1	53975	53975	6.09573	0.00243236	9.999e-05	0.000781172	NONE
Procedures	Anesthesia (last 6 months)	1	27492.1	27492.1	3.10092	0.00123685	0.0009999	0.00430991	NONE
Procedures	Tonsils removed (N0Y1)	1	15465.5	15465.5	1.74358	0.000696946	0.0374963	0.0892768	NONE
Procedures	Coloscopy (last 6 months)	1	11280.8	11280.8	1.27147	0.000507519	0.160784	0.251225	NONE
Procedures	Intensive care (last 6 months)	1	5516.51	5516.51	0.621609	0.000248185	0.957304	0.961149	NONE
Other	Stool consistenct	2	234392	117196	13.3339	0.0108464	9.999e-05	0.000781172	NONE
Other	Gut emptying frequency	6	213623	35603.8	4.0421	0.00963072	9.999e-05	0.000781172	NONE
Other	Has smoked last year (N0Y1)	1	33468.6	33468.6	3.80063	0.00369065	9.999e-05	0.000781172	NONE
Other	Does physical exercise (N0Y1)	1	70433.7	70433.7	7.95983	0.00316877	9.999e-05	0.000781172	NONE
Other	Alcohol consumption frequency	2	49671.5	24835.7	2.82742	0.00244835	9.999e-05	0.000781172	NONE
Other	Probiotics usage frequency	4	48707.6	12176.9	1.37324	0.00219499	0.0305969	0.075735	NONE
Other	Sampling season	3	33766.3	11255.4	1.26875	0.00152996	0.0923908	0.168596	NONE
Other	Has smoked (N0Y1)	1	29990.8	29990.8	3.38314	0.00134927	0.00019998	0.00128192	NONE
Other	Has used alcohol (N0Y1)	1	27412.3	27412.3	3.09178	0.0012337	0.00109989	0.00466055	NONE
Other	Has pets (N0Y1)	1	15962.1	15962.1	1.7996	0.000719324	0.0313969	0.076206	NONE
Other	Drinkingwater from well (N0Y1)	1	13942	13942	1.57172	0.000628292	0.0619938	0.131343	NONE
Other	Birthplace type city (N0Y1)	1	13631.8	13631.8	1.54243	0.000627121	0.0648935	0.134078	NONE
Other	Born by caeserean section (N0Y1)	1	12146.6	12146.6	1.36921	0.000547383	0.117288	0.198122	NONE
Other	Breastmilk in first monthes (N0Y1)	1	10069.6	10069.6	1.13498	0.000453784	0.251475	0.354155	NONE
