# Supplementary material for: Gut metagenome associations with extensive digital health data in a volunteer-based Estonian microbiome cohort
Source: Nat Commun. 2022 Feb 15;13:869. doi: 10.1038/s41467-022-28464-9 (PMC8847343; doi:10.1038/s41467-022-28464-9)
Supplement: Supplementary file 10 — Dataset 7 [file 41467_2022_28464_MOESM10_ESM.xlsx]

## Sheet: Shared species
kingdom	phylum	class	order	family	genus	species	n_Excl_AB	diseases_Excl_AB	common_dysbiosis_ExclAB	n_Incl_AB	diseases_Incl_AB	common_dysbiosis_InclAB
Bacteria	Firmicutes	Clostridia	Clostridiales	Lachnospiraceae	Lachnoclostridium	[Clostridium] clostridioforme	7	E11, I10, I11, K50, K51, K58, M10	Yes	4	E11, I11, K50, K51	Yes
Bacteria	Bacteroidetes	Bacteroidia	Bacteroidales	Bacteroidaceae	Bacteroides	Bacteroides clarus CAG:160	6	F41, I10, I11, K21, K50, M10	Yes	4	I10, I11, K50, M10	Yes
Bacteria	Bacteroidetes	Bacteroidia	Bacteroidales	Bacteroidaceae	Bacteroides	Bacteroides fragilis	6	F41, I10, I11, K21, K50, M10	Yes	3	I11, K50, M10	Yes
Bacteria	Bacteroidetes	Bacteroidia	Bacteroidales	Bacteroidaceae	Bacteroides	Bacteroides ovatus	6	F41, I10, I11, K21, K50, M10	Yes	2	K50, M10	-
Bacteria	Bacteroidetes	Bacteroidia	Bacteroidales	Bacteroidaceae	Bacteroides	Bacteroides sp. 2_2_4	6	F41, I10, I11, K21, K50, M10	Yes	2	K50, M10	-
Bacteria	Bacteroidetes	Bacteroidia	Bacteroidales	Bacteroidaceae	Bacteroides	Bacteroides thetaiotaomicron	6	F41, I10, I11, K21, K50, M10	Yes	4	F41, I11, K50, M10	Yes
Bacteria	Bacteroidetes	Bacteroidia	Bacteroidales	Bacteroidaceae	Bacteroides	Bacteroides thetaiotaomicron CAG:40	6	F41, I10, I11, K21, K50, M10	Yes	4	I10, I11, K50, M10	Yes
Eukaryota	Arthropoda	Arachnida	Araneae	Araneidae	Nephila	Nephila clavipes	6	C18, I10, I11, K50, K51, M10	Yes	5	C18, I11, K50, K51, M10	Yes
Bacteria	Actinobacteria	Coriobacteriia	Eggerthellales	Eggerthellaceae	Eggerthella	Eggerthella sp. CAG:1427	5	I10, I11, K50, K58, M10	Yes	2	K50, M10	-
Bacteria	Bacteroidetes	Bacteroidia	Bacteroidales	Bacteroidaceae	Bacteroides	Bacteroides dorei	5	F41, I10, I11, K21, M10	Yes	2	I10, M10	-
Bacteria	Bacteroidetes	Bacteroidia	Bacteroidales	Bacteroidaceae	Bacteroides	Bacteroides intestinalis CAG:315	5	F41, I10, I11, K21, M10	Yes	2	I11, M10	-
Bacteria	Bacteroidetes	Bacteroidia	Bacteroidales	Bacteroidaceae	Bacteroides	Bacteroides intestinalis CAG:564	5	I10, I11, K21, K50, M10	Yes	3	I11, K50, M10	Yes
Bacteria	Bacteroidetes	Bacteroidia	Bacteroidales	Bacteroidaceae	Bacteroides	Bacteroides sp. 1_1_14	5	F41, I10, I11, K50, M10	Yes	2	K50, M10	-
Bacteria	Bacteroidetes	Bacteroidia	Bacteroidales	Bacteroidaceae	Bacteroides	Bacteroides sp. 1_1_30	5	I10, I11, K21, K50, M10	Yes	3	I10, K50, M10	Yes
Bacteria	Bacteroidetes	Bacteroidia	Bacteroidales	Bacteroidaceae	Bacteroides	Bacteroides sp. D22	5	F41, I10, I11, K58, M10	Yes	1	M10	-
Bacteria	Bacteroidetes	Bacteroidia	Bacteroidales	Bacteroidaceae	Bacteroides	Bacteroides uniformis CAG:3	5	F41, I10, I11, K21, M10	Yes	3	I10, I11, M10	Yes
Bacteria	Bacteroidetes	Bacteroidia	Bacteroidales	Bacteroidaceae	Bacteroides	Bacteroides vulgatus	5	F41, I10, I11, K21, M10	Yes	2	I10, M10	-
Bacteria	Bacteroidetes	Bacteroidia	Bacteroidales	Bacteroidaceae	Bacteroides	Bacteroides xylanisolvens	5	I10, I11, K50, K58, M10	Yes	3	I11, K50, M10	Yes
Bacteria	Bacteroidetes	Bacteroidia	Bacteroidales	Tannerellaceae	Parabacteroides	Parabacteroides johnsonii CAG:246	5	I10, I11, K21, K50, M10	Yes	4	I10, I11, K50, M10	Yes
Bacteria	Bacteroidetes	Bacteroidia	Bacteroidales	Unclassified	Unclassified	Bacteroidales bacterium Barb6	5	I10, I11, K21, K50, M10	Yes	3	I10, I11, M10	Yes
Bacteria	Firmicutes	Clostridia	Clostridiales	Lachnospiraceae	Lachnoclostridium	[Clostridium] bolteae	5	E11, I10, I11, K51, K58	Yes	3	E11, I10, K51	Yes
Bacteria	Proteobacteria	Gammaproteobacteria	Enterobacterales	Enterobacteriaceae	Cronobacter	Cronobacter universalis	5	I10, I11, K50, K58, M10	Yes	3	I10, I11, K50	Yes
Bacteria	Proteobacteria	Gammaproteobacteria	Enterobacterales	Enterobacteriaceae	Escherichia	Escherichia coli	5	D51, E10, E11, I11, K50	Yes	4	D51, E10, E11, K50	Yes
Bacteria	Proteobacteria	Gammaproteobacteria	Enterobacterales	Enterobacteriaceae	Shigella	Shigella sonnei	5	D51, E11, I11, K50, M10	Yes	4	D51, E11, I11, K50	Yes
Bacteria	Proteobacteria	Gammaproteobacteria	Pseudomonadales	Moraxellaceae	Acinetobacter	Acinetobacter baumannii	5	C18, I10, I11, K50, M10	Yes	4	C18, I11, K50, M10	Yes
Bacteria	Bacteroidetes	Bacteroidia	Bacteroidales	Bacteroidaceae	Bacteroides	Bacteroides cellulosilyticus CAG:158	4	F41, I11, K21, M10	Yes	0		-
Bacteria	Bacteroidetes	Bacteroidia	Bacteroidales	Bacteroidaceae	Bacteroides	Bacteroides dorei CAG:222	4	F41, I10, I11, M10	Yes	1	M10	-
Bacteria	Bacteroidetes	Bacteroidia	Bacteroidales	Bacteroidaceae	Bacteroides	Bacteroides faecis CAG:32	4	I10, I11, K50, M10	Yes	3	I10, K50, M10	Yes
Bacteria	Bacteroidetes	Bacteroidia	Bacteroidales	Bacteroidaceae	Bacteroides	Bacteroides finegoldii	4	F41, I10, K21, M10	Yes	1	M10	-
Bacteria	Bacteroidetes	Bacteroidia	Bacteroidales	Bacteroidaceae	Bacteroides	Bacteroides finegoldii CAG:203	4	F41, I10, I11, M10	Yes	2	I11, M10	-
Bacteria	Bacteroidetes	Bacteroidia	Bacteroidales	Bacteroidaceae	Bacteroides	Bacteroides fluxus	4	F41, I10, I11, M10	Yes	3	I10, I11, M10	Yes
Bacteria	Bacteroidetes	Bacteroidia	Bacteroidales	Bacteroidaceae	Bacteroides	Bacteroides fragilis CAG:558	4	I10, I11, K50, M10	Yes	2	K50, M10	-
Bacteria	Bacteroidetes	Bacteroidia	Bacteroidales	Bacteroidaceae	Bacteroides	Bacteroides nordii	4	F41, I10, I11, M10	Yes	2	I11, M10	-
Bacteria	Bacteroidetes	Bacteroidia	Bacteroidales	Bacteroidaceae	Bacteroides	Bacteroides oleiciplenus	4	F41, I10, K21, M10	Yes	1	M10	-
Bacteria	Bacteroidetes	Bacteroidia	Bacteroidales	Bacteroidaceae	Bacteroides	Bacteroides ovatus CAG:22	4	I10, I11, K21, M10	Yes	1	M10	-
Bacteria	Bacteroidetes	Bacteroidia	Bacteroidales	Bacteroidaceae	Bacteroides	Bacteroides sartorii	4	F41, I10, I11, M10	Yes	2	I10, M10	-
Bacteria	Bacteroidetes	Bacteroidia	Bacteroidales	Bacteroidaceae	Bacteroides	Bacteroides sp. 2_1_22	4	I10, I11, K50, M10	Yes	3	I10, K50, M10	Yes
Bacteria	Bacteroidetes	Bacteroidia	Bacteroidales	Bacteroidaceae	Bacteroides	Bacteroides sp. 3_1_23	4	I11, K21, K50, M10	Yes	2	K50, M10	-
Bacteria	Bacteroidetes	Bacteroidia	Bacteroidales	Bacteroidaceae	Bacteroides	Bacteroides sp. 3_1_40A	4	F41, I10, I11, M10	Yes	2	I10, M10	-
Bacteria	Bacteroidetes	Bacteroidia	Bacteroidales	Bacteroidaceae	Bacteroides	Bacteroides sp. 4_3_47FAA	4	F41, I10, K21, M10	Yes	2	I10, M10	-
Bacteria	Bacteroidetes	Bacteroidia	Bacteroidales	Bacteroidaceae	Bacteroides	Bacteroides sp. AM56-10ce	4	I10, I11, K50, M10	Yes	3	I10, K50, M10	Yes
Bacteria	Bacteroidetes	Bacteroidia	Bacteroidales	Bacteroidaceae	Bacteroides	Bacteroides sp. AR29	4	F41, I10, I11, M10	Yes	1	I10	-
Bacteria	Bacteroidetes	Bacteroidia	Bacteroidales	Bacteroidaceae	Bacteroides	Bacteroides stercoris CAG:120	4	F41, I10, I11, M10	Yes	3	I10, I11, M10	Yes
Bacteria	Bacteroidetes	Bacteroidia	Bacteroidales	Bacteroidaceae	Bacteroides	Bacteroides uniformis	4	F41, I10, I11, M10	Yes	1	I10	-
Bacteria	Bacteroidetes	Bacteroidia	Bacteroidales	Tannerellaceae	Parabacteroides	Parabacteroides distasonis	4	I10, I11, K21, M10	Yes	2	I10, M10	-
Bacteria	Bacteroidetes	Bacteroidia	Bacteroidales	Tannerellaceae	Parabacteroides	Parabacteroides merdae CAG:48	4	I10, I11, K21, M10	Yes	3	I10, I11, M10	Yes
Bacteria	Bacteroidetes	Bacteroidia	Bacteroidales	Tannerellaceae	Parabacteroides	Parabacteroides sp. AM17-47	4	I10, K21, K50, M10	Yes	1	K50	-
Bacteria	Bacteroidetes	Bacteroidia	Bacteroidales	Tannerellaceae	Parabacteroides	Parabacteroides sp. CAG:2	4	F41, I10, K21, M10	Yes	2	I10, M10	-
Bacteria	Bacteroidetes	Bacteroidia	Bacteroidales	Tannerellaceae	Tannerella	Tannerella sp. 6_1_58FAA_CT1	4	F41, I10, K21, M10	Yes	0		-
Bacteria	Bacteroidetes	Bacteroidia	Bacteroidales	Unclassified	Unclassified	Bacteroidales bacterium Barb7	4	I10, I11, K50, M10	Yes	4	I10, I11, K50, M10	Yes
Bacteria	Firmicutes	Clostridia	Clostridiales	Clostridiaceae	Clostridium	Clostridium sp. KLE 1755	4	I10, I11, K50, K58	Yes	1	K50	-
Bacteria	Firmicutes	Clostridia	Clostridiales	Ruminococcaceae	Ruminococcus	Ruminococcus sp. CAG:60	4	F41, I11, K50, M10	Yes	1	K50	-
Bacteria	Firmicutes	Unclassified	Unclassified	Unclassified	Unclassified	Firmicutes bacterium CAG:176_59_8	4	F41, I10, I11, M10	Yes	2	I11, M10	-
Bacteria	Proteobacteria	Betaproteobacteria	Burkholderiales	Burkholderiaceae	Ralstonia	Ralstonia solanacearum	4	I10, I11, K58, M10	Yes	3	I11, K58, M10	Yes
Bacteria	Proteobacteria	Gammaproteobacteria	Enterobacterales	Enterobacteriaceae	Citrobacter	Citrobacter koseri	4	E11, I11, K50, M10	Yes	2	E11, K50	-
Bacteria	Proteobacteria	Gammaproteobacteria	Enterobacterales	Enterobacteriaceae	Cronobacter	Cronobacter dublinensis	4	I10, I11, K50, M10	Yes	3	I11, K50, M10	Yes
Bacteria	Proteobacteria	Gammaproteobacteria	Enterobacterales	Enterobacteriaceae	Cronobacter	Cronobacter malonaticus	4	E10, E11, K50, K51	Yes	3	E10, K50, K51	Yes
Bacteria	Proteobacteria	Gammaproteobacteria	Enterobacterales	Enterobacteriaceae	Klebsiella	Klebsiella oxytoca	4	E11, I11, K50, K51	Yes	4	E11, I11, K50, K51	Yes
Bacteria	Proteobacteria	Gammaproteobacteria	Enterobacterales	Enterobacteriaceae	Salmonella	Salmonella enterica	4	E11, I11, K50, M10	Yes	4	E11, I11, K50, M10	Yes
Bacteria	Proteobacteria	Gammaproteobacteria	Enterobacterales	Enterobacteriaceae	Shigella	Shigella flexneri	4	E11, I11, K50, M10	Yes	4	E11, I11, K50, M10	Yes
Bacteria	Proteobacteria	Gammaproteobacteria	Oceanospirillales	Halomonadaceae	Zymobacter	Zymobacter palmae	4	I10, I11, K50, M10	Yes	3	I11, K50, M10	Yes
Bacteria	Proteobacteria	Gammaproteobacteria	Vibrionales	Vibrionaceae	Vibrio	Vibrio cholerae	4	I10, I11, K50, M10	Yes	2	I11, K50	-
Bacteria	Unclassified	Unclassified	Unclassified	Unclassified	Unclassified	uncultured bacterium	4	I10, I11, K21, K50	Yes	2	I11, K50	-
Bacteria	Unclassified	Unclassified	Unclassified	Unclassified	Unclassified	uncultured bacterium MedeBAC46A06	4	F41, I10, I11, M10	Yes	3	I10, I11, M10	Yes
Bacteria	Actinobacteria	Actinobacteria	Corynebacteriales	Mycobacteriaceae	Mycobacterium	Mycobacterium tuberculosis	3	I11, K50, M10	Yes	2	I11, K50	-
Bacteria	Bacteroidetes	Bacteroidia	Bacteroidales	Bacteroidaceae	Bacteroides	Bacteroides eggerthii CAG:109	3	I10, I11, M10	Yes	2	I11, M10	-
Bacteria	Bacteroidetes	Bacteroidia	Bacteroidales	Bacteroidaceae	Bacteroides	Bacteroides faecichinchillae	3	I10, K21, M10	Yes	2	K21, M10	-
Bacteria	Bacteroidetes	Bacteroidia	Bacteroidales	Bacteroidaceae	Bacteroides	Bacteroides fragilis CAG:47	3	I10, I11, M10	Yes	3	I10, I11, M10	Yes
Bacteria	Bacteroidetes	Bacteroidia	Bacteroidales	Bacteroidaceae	Bacteroides	Bacteroides sp. 3_1_33FAA	3	F41, I10, M10	Yes	0		-
Bacteria	Bacteroidetes	Bacteroidia	Bacteroidales	Bacteroidaceae	Bacteroides	Bacteroides sp. 4_1_36	3	F41, I10, M10	Yes	0		-
Bacteria	Bacteroidetes	Bacteroidia	Bacteroidales	Bacteroidaceae	Bacteroides	Bacteroides sp. 9_1_42FAA	3	I10, K21, M10	Yes	1	M10	-
Bacteria	Bacteroidetes	Bacteroidia	Bacteroidales	Bacteroidaceae	Bacteroides	Bacteroides sp. AM54-2NS	3	I11, K58, M10	Yes	1	I11	-
Bacteria	Bacteroidetes	Bacteroidia	Bacteroidales	Bacteroidaceae	Bacteroides	Bacteroides sp. CAG:189	3	I10, I11, M10	Yes	2	I11, M10	-
Bacteria	Bacteroidetes	Bacteroidia	Bacteroidales	Bacteroidaceae	Bacteroides	Bacteroides sp. CAG:598	3	I10, K21, M10	Yes	1	M10	-
Bacteria	Bacteroidetes	Bacteroidia	Bacteroidales	Bacteroidaceae	Bacteroides	Bacteroides sp. CAG:702	3	I11, K50, M10	Yes	1	K50	-
Bacteria	Bacteroidetes	Bacteroidia	Bacteroidales	Bacteroidaceae	Bacteroides	Bacteroides sp. D1	3	F41, I11, M10	Yes	2	I11, M10	-
Bacteria	Bacteroidetes	Bacteroidia	Bacteroidales	Bacteroidaceae	Bacteroides	Bacteroides sp. D20	3	F41, I10, M10	Yes	0		-
Bacteria	Bacteroidetes	Bacteroidia	Bacteroidales	Porphyromonadaceae	Porphyromonas	Porphyromonas crevioricanis	3	I10, I11, M10	Yes	1	I11	-
Bacteria	Bacteroidetes	Bacteroidia	Bacteroidales	Porphyromonadaceae	Porphyromonas	Porphyromonas gingivalis	3	E78, I11, M10	Yes	2	E78, M10	-
Bacteria	Bacteroidetes	Bacteroidia	Bacteroidales	Porphyromonadaceae	Porphyromonas	Porphyromonas sp. 31_2	3	I10, K21, M10	Yes	2	I10, M10	-
Bacteria	Bacteroidetes	Bacteroidia	Bacteroidales	Porphyromonadaceae	Unclassified	Porphyromonadaceae bacterium KA00676	3	I10, I11, M10	Yes	1	M10	-
Bacteria	Bacteroidetes	Bacteroidia	Bacteroidales	Rikenellaceae	Alistipes	Alistipes sp. CAG:157	3	I11, K50, M10	Yes	2	I11, K50	-
Bacteria	Bacteroidetes	Bacteroidia	Bacteroidales	Tannerellaceae	Parabacteroides	Parabacteroides merdae	3	I10, K21, M10	Yes	0		-
Bacteria	Bacteroidetes	Bacteroidia	Bacteroidales	Tannerellaceae	Parabacteroides	Parabacteroides sp. 20_3	3	I10, J20, M10	Yes	2	I10, M10	-
Bacteria	Bacteroidetes	Bacteroidia	Bacteroidales	Tannerellaceae	Parabacteroides	Parabacteroides sp. D13	3	I10, K21, M10	Yes	2	I10, M10	-
Bacteria	Bacteroidetes	Bacteroidia	Bacteroidales	Tannerellaceae	Parabacteroides	Parabacteroides sp. D25	3	F41, I10, K21	Yes	1	I10	-
Bacteria	Bacteroidetes	Bacteroidia	Bacteroidales	Unclassified	Unclassified	Bacteroidales bacterium Barb4	3	I10, I11, M10	Yes	1	I11	-
Bacteria	Bacteroidetes	Bacteroidia	Bacteroidales	Unclassified	Unclassified	Bacteroidales bacterium Barb6XT	3	I10, I11, M10	Yes	3	I10, I11, M10	Yes
Bacteria	Bacteroidetes	Cytophagia	Cytophagales	Flammeovirgaceae	Cesiribacter	Cesiribacter andamanensis	3	I10, I11, M10	Yes	2	I11, M10	-
Bacteria	Bacteroidetes	Flavobacteriia	Flavobacteriales	Flavobacteriaceae	Ornithobacterium	Ornithobacterium rhinotracheale	3	E78, I10, M10	Yes	3	E78, I10, M10	Yes
Bacteria	Firmicutes	Clostridia	Clostridiales	Lachnospiraceae	Blautia	Blautia sp. CAG:237	3	F41, I10, M10	Yes	2	F41, M10	-
Bacteria	Firmicutes	Clostridia	Clostridiales	Ruminococcaceae	Flavonifractor	Flavonifractor plautii	3	E11, K50, K51	Yes	3	E11, K50, K51	Yes
Bacteria	Firmicutes	Erysipelotrichia	Erysipelotrichales	Erysipelotrichaceae	Coprobacillus	Coprobacillus sp. CAG:826	3	I10, K58, M10	Yes	1	I10	-
Bacteria	Firmicutes	Unclassified	Unclassified	Unclassified	Unclassified	Firmicutes bacterium CAG:345	3	I10, I11, M10	Yes	2	I10, I11	-
Bacteria	Proteobacteria	Alphaproteobacteria	Rhodospirillales	Rhodospirillaceae	Nitrospirillum	Nitrospirillum amazonense	3	I10, I11, M10	Yes	2	I10, M10	-
Bacteria	Proteobacteria	Betaproteobacteria	Burkholderiales	Alcaligenaceae	Bordetella	Bordetella pertussis	3	I10, I11, M10	Yes	2	I11, M10	-
Bacteria	Proteobacteria	Betaproteobacteria	Burkholderiales	Comamonadaceae	Hydrogenophaga	Hydrogenophaga sp. T4	3	I10, I11, M10	Yes	2	I11, M10	-
Bacteria	Proteobacteria	Betaproteobacteria	Neisseriales	Neisseriaceae	Neisseria	Neisseria meningitidis	3	I10, I11, M10	Yes	2	I11, M10	-
Bacteria	Proteobacteria	Deltaproteobacteria	Myxococcales	Archangiaceae	Stigmatella	Stigmatella aurantiaca	3	C18, E11, I10	Yes	0		-
Bacteria	Proteobacteria	Gammaproteobacteria	Chromatiales	Chromatiaceae	Thiocapsa	Thiocapsa sp. KS1	3	I10, I11, M10	Yes	2	I11, M10	-
Bacteria	Proteobacteria	Gammaproteobacteria	Enterobacterales	Enterobacteriaceae	Cronobacter	Cronobacter sakazakii	3	I11, K50, M10	Yes	3	I11, K50, M10	Yes
Bacteria	Proteobacteria	Gammaproteobacteria	Enterobacterales	Enterobacteriaceae	Enterobacter	Enterobacter cloacae	3	E11, I11, K50	Yes	3	E11, I11, K50	Yes
Bacteria	Proteobacteria	Gammaproteobacteria	Enterobacterales	Yersiniaceae	Serratia	Serratia marcescens	3	I10, I11, M10	Yes	2	I11, M10	-
Bacteria	Proteobacteria	Gammaproteobacteria	Pseudomonadales	Pseudomonadaceae	Pseudomonas	Pseudomonas aeruginosa	3	I10, I11, M10	Yes	3	I10, I11, M10	Yes
Bacteria	Proteobacteria	Gammaproteobacteria	Pseudomonadales	Pseudomonadaceae	Pseudomonas	Pseudomonas putida	3	I11, K50, K51	Yes	3	I11, K50, K51	Yes
Bacteria	Proteobacteria	Gammaproteobacteria	Pseudomonadales	Pseudomonadaceae	Pseudomonas	Pseudomonas syringae	3	I10, I11, K50	Yes	3	I10, I11, K50	Yes
Bacteria	Proteobacteria	Gammaproteobacteria	Pseudomonadales	Pseudomonadaceae	Pseudomonas	Pseudomonas syringae group genomosp. 3	3	I10, I11, M10	Yes	2	I10, M10	-
Bacteria	Proteobacteria	Gammaproteobacteria	Xanthomonadales	Xanthomonadaceae	Xanthomonas	Xanthomonas phaseoli	3	I10, I11, M10	Yes	2	I11, M10	-
Eukaryota	Streptophyta	Liliopsida	Poales	Poaceae	Zea	Zea mays	3	I10, I11, K58	Yes	1	I10	-
Bacteria	Actinobacteria	Actinobacteria	Corynebacteriales	Mycobacteriaceae	Mycobacteroides	Mycobacteroides abscessus	2	I11, M10	-	2	I11, M10	-
Bacteria	Bacteroidetes	Bacteroidia	Bacteroidales	Bacteroidaceae	Bacteroides	Bacteroides caccae CAG:21	2	I11, M10	-	2	I11, M10	-
Bacteria	Bacteroidetes	Bacteroidia	Bacteroidales	Bacteroidaceae	Bacteroides	Bacteroides caecimuris	2	I10, M10	-	0		-
Bacteria	Bacteroidetes	Bacteroidia	Bacteroidales	Bacteroidaceae	Bacteroides	Bacteroides clarus	2	I10, M10	-	1	M10	-
Bacteria	Bacteroidetes	Bacteroidia	Bacteroidales	Bacteroidaceae	Bacteroides	Bacteroides coprophilus CAG:333	2	I10, M10	-	2	I10, M10	-
Bacteria	Bacteroidetes	Bacteroidia	Bacteroidales	Bacteroidaceae	Bacteroides	Bacteroides sp. 2_1_33B	2	I10, M10	-	2	I10, M10	-
Bacteria	Bacteroidetes	Bacteroidia	Bacteroidales	Bacteroidaceae	Bacteroides	Bacteroides sp. 3_1_13	2	K58, M10	-	1	M10	-
Bacteria	Bacteroidetes	Bacteroidia	Bacteroidales	Bacteroidaceae	Bacteroides	Bacteroides sp. 3_1_19	2	I10, M10	-	1	M10	-
Bacteria	Bacteroidetes	Bacteroidia	Bacteroidales	Bacteroidaceae	Bacteroides	Bacteroides sp. AF25-17LB	2	F41, M10	-	0		-
Bacteria	Bacteroidetes	Bacteroidia	Bacteroidales	Bacteroidaceae	Bacteroides	Bacteroides sp. AF34-31BH	2	F41, M10	-	0		-
Bacteria	Bacteroidetes	Bacteroidia	Bacteroidales	Bacteroidaceae	Bacteroides	Bacteroides sp. AF37-16AC	2	F41, I10	-	0		-
Bacteria	Bacteroidetes	Bacteroidia	Bacteroidales	Bacteroidaceae	Bacteroides	Bacteroides sp. CAG:661	2	I10, M10	-	0		-
Bacteria	Bacteroidetes	Bacteroidia	Bacteroidales	Bacteroidaceae	Bacteroides	Bacteroides sp. CAG:754	2	K50, M10	-	2	K50, M10	-
Bacteria	Bacteroidetes	Bacteroidia	Bacteroidales	Bacteroidaceae	Bacteroides	Bacteroides sp. CF01-10NS	2	K50, M10	-	2	K50, M10	-
Bacteria	Bacteroidetes	Bacteroidia	Bacteroidales	Bacteroidaceae	Bacteroides	Bacteroides sp. HMSC067B03	2	I10, M10	-	0		-
Bacteria	Bacteroidetes	Bacteroidia	Bacteroidales	Bacteroidaceae	Bacteroides	Bacteroides sp. OF03-11BH	2	I10, M10	-	0		-
Bacteria	Bacteroidetes	Bacteroidia	Bacteroidales	Bacteroidaceae	Bacteroides	Bacteroides sp. OM08-17BH	2	I10, M10	-	0		-
Bacteria	Bacteroidetes	Bacteroidia	Bacteroidales	Bacteroidaceae	Bacteroides	Bacteroides stercoris	2	I10, M10	-	2	I10, M10	-
Bacteria	Bacteroidetes	Bacteroidia	Bacteroidales	Bacteroidaceae	Bacteroides	Bacteroides vulgatus CAG:6	2	I10, M10	-	1	M10	-
Bacteria	Bacteroidetes	Bacteroidia	Bacteroidales	Dysgonamonadaceae	Dysgonomonas	uncultured Dysgonomonas sp.	2	I10, M10	-	0		-
Bacteria	Bacteroidetes	Bacteroidia	Bacteroidales	Odoribacteraceae	Odoribacter	Odoribacter splanchnicus CAG:14	2	I11, M10	-	1	M10	-
Bacteria	Bacteroidetes	Bacteroidia	Bacteroidales	Prevotellaceae	Prevotella	Prevotella sp. F0091	2	K50, M10	-	0		-
Bacteria	Bacteroidetes	Bacteroidia	Bacteroidales	Rikenellaceae	Alistipes	Alistipes finegoldii CAG:68	2	I11, M10	-	1	M10	-
Bacteria	Bacteroidetes	Bacteroidia	Bacteroidales	Rikenellaceae	Alistipes	Alistipes sp. CAG:29	2	I11, M10	-	1	M10	-
Bacteria	Bacteroidetes	Bacteroidia	Bacteroidales	Tannerellaceae	Parabacteroides	Parabacteroides johnsonii	2	I10, M10	-	1	M10	-
Bacteria	Bacteroidetes	Bacteroidia	Bacteroidales	Tannerellaceae	Tannerella	Tannerella sp. CAG:118	2	K50, M10	-	1	K50	-
Bacteria	Bacteroidetes	Bacteroidia	Bacteroidales	Tannerellaceae	Tannerella	Tannerella sp. CAG:51	2	I10, M10	-	0		-
Bacteria	Cyanobacteria	Unclassified	Nostocales	Hapalosiphonaceae	Fischerella	Fischerella thermalis	2	F41, I10	-	0		-
Bacteria	Cyanobacteria	Unclassified	Nostocales	Tolypothrichaceae	Tolypothrix	Tolypothrix campylonemoides	2	I11, M10	-	2	I11, M10	-
Bacteria	Cyanobacteria	Unclassified	Oscillatoriales	Microcoleaceae	Trichodesmium	Trichodesmium erythraeum	2	F41, I10	-	0		-
Bacteria	Firmicutes	Bacilli	Lactobacillales	Streptococcaceae	Streptococcus	Streptococcus pneumoniae	2	I10, I11	-	1	I11	-
Bacteria	Firmicutes	Clostridia	Clostridiales	Clostridiaceae	Butyricicoccus	uncultured Butyricicoccus sp.	2	K50, K51	-	2	K50, K51	-
Bacteria	Firmicutes	Clostridia	Clostridiales	Clostridiaceae	Clostridium	Clostridium sp. AM34-11AC	2	C18, K51	-	2	C18, K51	-
Bacteria	Firmicutes	Clostridia	Clostridiales	Clostridiaceae	Clostridium	Clostridium sp. ATCC BAA-442	2	K50, K51	-	2	K50, K51	-
Bacteria	Firmicutes	Clostridia	Clostridiales	Clostridiaceae	Clostridium	Clostridium sp. CAG:349	2	I10, M10	-	0		-
Bacteria	Firmicutes	Clostridia	Clostridiales	Clostridiaceae	Clostridium	Clostridium sp. CAG:43	2	I11, K21	-	0		-
Bacteria	Firmicutes	Clostridia	Clostridiales	Clostridiaceae	Clostridium	Clostridium sp. CAG:505	2	I10, M10	-	0		-
Bacteria	Firmicutes	Clostridia	Clostridiales	Clostridiaceae	Clostridium	Clostridium sp. CAG:81	2	D51, K51	-	2	D51, K51	-
Bacteria	Firmicutes	Clostridia	Clostridiales	Eubacteriaceae	Eubacterium	Eubacterium sp. CAG:841	2	F41, M10	-	1	M10	-
Bacteria	Firmicutes	Clostridia	Clostridiales	Oscillospiraceae	Oscillibacter	Oscillibacter sp. KLE 1728	2	I10, J20	-	1	I10	-
Bacteria	Firmicutes	Clostridia	Clostridiales	Oscillospiraceae	Oscillibacter	Oscillibacter sp. KLE 1745	2	I10, K21	-	0		-
Bacteria	Firmicutes	Clostridia	Clostridiales	Oscillospiraceae	Unclassified	Oscillospiraceae bacterium VE202-24	2	E11, I10	-	0		-
Bacteria	Firmicutes	Clostridia	Clostridiales	Ruminococcaceae	Ruminococcus	Ruminococcus sp. CAG:379	2	I10, K58	-	0		-
Bacteria	Firmicutes	Clostridia	Clostridiales	Unclassified	Unclassified	Clostridiales bacterium VE202-03	2	E11, K51	-	2	E11, K51	-
Bacteria	Firmicutes	Erysipelotrichia	Erysipelotrichales	Erysipelotrichaceae	Coprobacillus	Coprobacillus sp. CAG:698	2	I10, M10	-	1	M10	-
Bacteria	Firmicutes	Unclassified	Unclassified	Unclassified	Unclassified	Firmicutes bacterium CAG:272_52_7	2	I10, M10	-	1	M10	-
Bacteria	Firmicutes	Unclassified	Unclassified	Unclassified	Unclassified	Firmicutes bacterium CAG:466	2	I10, K50	-	1	K50	-
Bacteria	Firmicutes	Unclassified	Unclassified	Unclassified	Unclassified	Firmicutes bacterium CAG:94	2	K50, K51	-	2	K50, K51	-
Bacteria	Proteobacteria	Alphaproteobacteria	Rhizobiales	Rhizobiaceae	Agrobacterium	Agrobacterium genomosp. 5	2	I10, M10	-	0		-
Bacteria	Proteobacteria	Alphaproteobacteria	Rhizobiales	Rhizobiaceae	Agrobacterium	Agrobacterium tumefaciens	2	I10, M10	-	1	I10	-
Bacteria	Proteobacteria	Alphaproteobacteria	Rhizobiales	Rhizobiaceae	Rhizobium	Rhizobium etli	2	I11, M10	-	1	M10	-
Bacteria	Proteobacteria	Alphaproteobacteria	Rhizobiales	Rhizobiaceae	Rhizobium	Rhizobium freirei	2	I11, M10	-	2	I11, M10	-
Bacteria	Proteobacteria	Betaproteobacteria	Burkholderiales	Alcaligenaceae	Achromobacter	Achromobacter xylosoxidans	2	I11, M10	-	2	I11, M10	-
Bacteria	Proteobacteria	Betaproteobacteria	Burkholderiales	Burkholderiaceae	Burkholderia	Burkholderia pseudomallei	2	I11, M10	-	1	M10	-
Bacteria	Proteobacteria	Betaproteobacteria	Burkholderiales	Burkholderiaceae	Cupriavidus	Cupriavidus oxalaticus	2	I10, M10	-	0		-
Bacteria	Proteobacteria	Betaproteobacteria	Burkholderiales	Burkholderiaceae	Cupriavidus	Cupriavidus taiwanensis	2	I11, M10	-	2	I11, M10	-
Bacteria	Proteobacteria	Betaproteobacteria	Burkholderiales	Comamonadaceae	Variovorax	Variovorax sp. WDL1	2	I10, M10	-	1	M10	-
Bacteria	Proteobacteria	Betaproteobacteria	Burkholderiales	Oxalobacteraceae	Unclassified	Oxalobacteraceae bacterium IMCC9480	2	I11, K21	-	1	I11	-
Bacteria	Proteobacteria	Betaproteobacteria	Burkholderiales	Sutterellaceae	Sutterella	Sutterella sp. CAG:351	2	K50, M10	-	1	K50	-
Bacteria	Proteobacteria	Gammaproteobacteria	Enterobacterales	Enterobacteriaceae	Enterobacter	Enterobacter ludwigii	2	I11, M10	-	2	I11, M10	-
Bacteria	Proteobacteria	Gammaproteobacteria	Enterobacterales	Enterobacteriaceae	Klebsiella	Klebsiella pneumoniae	2	I11, K50	-	2	I11, K50	-
Bacteria	Proteobacteria	Gammaproteobacteria	Pseudomonadales	Pseudomonadaceae	Pseudomonas	Pseudomonas chlororaphis	2	I10, M10	-	2	I10, M10	-
Bacteria	Proteobacteria	Gammaproteobacteria	Xanthomonadales	Xanthomonadaceae	Stenotrophomonas	Stenotrophomonas maltophilia	2	I10, M10	-	1	M10	-
Bacteria	Proteobacteria	Gammaproteobacteria	Xanthomonadales	Xanthomonadaceae	Xanthomonas	Xanthomonas citri	2	I11, M10	-	1	M10	-
Bacteria	Tenericutes	Mollicutes	Anaeroplasmatales	Anaeroplasmataceae	Anaeroplasma	Anaeroplasma bactoclasticum	2	I10, M10	-	1	M10	-
Bacteria	Actinobacteria	Actinobacteria	Bifidobacteriales	Bifidobacteriaceae	Bifidobacterium	Bifidobacterium animalis	1	M10	-	0		-
Bacteria	Actinobacteria	Actinobacteria	Micrococcales	Microbacteriaceae	Curtobacterium	Curtobacterium sp. ER1_6	1	M10	-	0		-
Bacteria	Actinobacteria	Actinobacteria	Micrococcales	Micrococcaceae	Rothia	Rothia mucilaginosa	1	I11	-	1	I11	-
Bacteria	Actinobacteria	Coriobacteriia	Eggerthellales	Eggerthellaceae	Eggerthella	Eggerthella sp. 51_9	1	F41	-	0		-
Bacteria	Bacteroidetes	Bacteroidia	Bacteroidales	Bacteroidaceae	Bacteroides	Bacteroides acidifaciens	1	M10	-	0		-
Bacteria	Bacteroidetes	Bacteroidia	Bacteroidales	Bacteroidaceae	Bacteroides	Bacteroides caccae	1	M10	-	0		-
Bacteria	Bacteroidetes	Bacteroidia	Bacteroidales	Bacteroidaceae	Bacteroides	Bacteroides cellulosilyticus	1	F33	-	1	F33	-
Bacteria	Bacteroidetes	Bacteroidia	Bacteroidales	Bacteroidaceae	Bacteroides	Bacteroides eggerthii	1	I10	-	0		-
Bacteria	Bacteroidetes	Bacteroidia	Bacteroidales	Bacteroidaceae	Bacteroides	Bacteroides faecis	1	I10	-	0		-
Bacteria	Bacteroidetes	Bacteroidia	Bacteroidales	Bacteroidaceae	Bacteroides	Bacteroides intestinalis	1	K21	-	0		-
Bacteria	Bacteroidetes	Bacteroidia	Bacteroidales	Bacteroidaceae	Bacteroides	Bacteroides ndongoniae	1	J20	-	0		-
Bacteria	Bacteroidetes	Bacteroidia	Bacteroidales	Bacteroidaceae	Bacteroides	Bacteroides reticulotermitis	1	K50	-	1	K50	-
Bacteria	Bacteroidetes	Bacteroidia	Bacteroidales	Bacteroidaceae	Bacteroides	Bacteroides sp. 43_46	1	M10	-	1	M10	-
Bacteria	Bacteroidetes	Bacteroidia	Bacteroidales	Bacteroidaceae	Bacteroides	Bacteroides sp. AF14-46	1	E11	-	1	E11	-
Bacteria	Bacteroidetes	Bacteroidia	Bacteroidales	Bacteroidaceae	Bacteroides	Bacteroides sp. AF17-1	1	M10	-	1	M10	-
Bacteria	Bacteroidetes	Bacteroidia	Bacteroidales	Bacteroidaceae	Bacteroides	Bacteroides sp. AF20-13LB	1	I10	-	0		-
Bacteria	Bacteroidetes	Bacteroidia	Bacteroidales	Bacteroidaceae	Bacteroides	Bacteroides sp. AF25-5LB	1	I10	-	0		-
Bacteria	Bacteroidetes	Bacteroidia	Bacteroidales	Bacteroidaceae	Bacteroides	Bacteroides sp. AF27-10BH	1	K29	-	0		-
Bacteria	Bacteroidetes	Bacteroidia	Bacteroidales	Bacteroidaceae	Bacteroides	Bacteroides sp. AF29-11	1	I10	-	0		-
Bacteria	Bacteroidetes	Bacteroidia	Bacteroidales	Bacteroidaceae	Bacteroides	Bacteroides sp. AF32-8BH	1	M10	-	0		-
Bacteria	Bacteroidetes	Bacteroidia	Bacteroidales	Bacteroidaceae	Bacteroides	Bacteroides sp. AM37-9	1	M10	-	1	M10	-
Bacteria	Bacteroidetes	Bacteroidia	Bacteroidales	Bacteroidaceae	Bacteroides	Bacteroides sp. AR20	1	I11	-	1	I11	-
Bacteria	Bacteroidetes	Bacteroidia	Bacteroidales	Bacteroidaceae	Bacteroides	Bacteroides sp. CAG:1076	1	K50	-	1	K50	-
Bacteria	Bacteroidetes	Bacteroidia	Bacteroidales	Bacteroidaceae	Bacteroides	Bacteroides sp. CAG:144	1	M10	-	0		-
Bacteria	Bacteroidetes	Bacteroidia	Bacteroidales	Bacteroidaceae	Bacteroides	Bacteroides sp. CAG:633	1	I11	-	0		-
Bacteria	Bacteroidetes	Bacteroidia	Bacteroidales	Bacteroidaceae	Bacteroides	Bacteroides sp. CAG:875	1	K50	-	1	K50	-
Bacteria	Bacteroidetes	Bacteroidia	Bacteroidales	Bacteroidaceae	Bacteroides	Bacteroides sp. D2	1	M10	-	1	M10	-
Bacteria	Bacteroidetes	Bacteroidia	Bacteroidales	Bacteroidaceae	Bacteroides	Bacteroides sp. HMSC068A09	1	M10	-	1	M10	-
Bacteria	Bacteroidetes	Bacteroidia	Bacteroidales	Bacteroidaceae	Bacteroides	Bacteroides sp. HPS0048	1	M10	-	1	M10	-
Bacteria	Bacteroidetes	Bacteroidia	Bacteroidales	Bacteroidaceae	Bacteroides	Bacteroides sp. KFT8	1	M10	-	1	M10	-
Bacteria	Bacteroidetes	Bacteroidia	Bacteroidales	Bacteroidaceae	Bacteroides	Bacteroides sp. OM05-10AA	1	M10	-	1	M10	-
Bacteria	Bacteroidetes	Bacteroidia	Bacteroidales	Odoribacteraceae	Odoribacter	Odoribacter sp. 43_10	1	M10	-	1	M10	-
Bacteria	Bacteroidetes	Bacteroidia	Bacteroidales	Odoribacteraceae	Odoribacter	Odoribacter splanchnicus	1	M10	-	1	M10	-
Bacteria	Bacteroidetes	Bacteroidia	Bacteroidales	Prevotellaceae	Alloprevotella	Prevotella sp. oral taxon 473	1	M10	-	0		-
Bacteria	Bacteroidetes	Bacteroidia	Bacteroidales	Prevotellaceae	Prevotella	Prevotella saccharolytica	1	K50	-	1	K50	-
Bacteria	Bacteroidetes	Bacteroidia	Bacteroidales	Prevotellaceae	Prevotella	Prevotella sp. CAG:755	1	M10	-	0		-
Bacteria	Bacteroidetes	Bacteroidia	Bacteroidales	Prevotellaceae	Prevotella	Prevotella sp. MSX73	1	I11	-	1	I11	-
Bacteria	Bacteroidetes	Bacteroidia	Bacteroidales	Prevotellaceae	Prevotella	Prevotella sp. tf2-5	1	K50	-	1	K50	-
Bacteria	Bacteroidetes	Bacteroidia	Bacteroidales	Rikenellaceae	Alistipes	Alistipes finegoldii	1	M10	-	1	M10	-
Bacteria	Bacteroidetes	Bacteroidia	Bacteroidales	Rikenellaceae	Alistipes	Alistipes putredinis CAG:67	1	M10	-	0		-
Bacteria	Bacteroidetes	Bacteroidia	Bacteroidales	Rikenellaceae	Alistipes	Alistipes sp. 58_9_plus	1	M10	-	1	M10	-
Bacteria	Bacteroidetes	Bacteroidia	Bacteroidales	Rikenellaceae	Alistipes	Alistipes sp. CAG:268	1	M10	-	0		-
Bacteria	Bacteroidetes	Bacteroidia	Bacteroidales	Rikenellaceae	Alistipes	Alistipes sp. CAG:53	1	M10	-	1	M10	-
Bacteria	Bacteroidetes	Bacteroidia	Bacteroidales	Rikenellaceae	Alistipes	Alistipes sp. CHKCI003	1	M10	-	1	M10	-
Bacteria	Bacteroidetes	Bacteroidia	Bacteroidales	Rikenellaceae	Alistipes	Alistipes sp. HGB5	1	M10	-	1	M10	-
Bacteria	Bacteroidetes	Bacteroidia	Bacteroidales	Rikenellaceae	Rikenella	Rikenella microfusus	1	M10	-	0		-
Bacteria	Bacteroidetes	Bacteroidia	Bacteroidales	Tannerellaceae	Parabacteroides	Parabacteroides gordonii	1	I10	-	0		-
Bacteria	Bacteroidetes	Bacteroidia	Bacteroidales	Tannerellaceae	Parabacteroides	Parabacteroides sp. D26	1	M10	-	0		-
Bacteria	Bacteroidetes	Bacteroidia	Bacteroidales	Unclassified	Unclassified	Bacteroidales bacterium WCE2008	1	M10	-	0		-
Bacteria	Firmicutes	Bacilli	Bacillales	Paenibacillaceae	Paenibacillus	Paenibacillus sp. P22	1	I11	-	0		-
Bacteria	Firmicutes	Bacilli	Lactobacillales	Streptococcaceae	Streptococcus	Streptococcus parasanguinis	1	M10	-	0		-
Bacteria	Firmicutes	Bacilli	Lactobacillales	Streptococcaceae	Streptococcus	Streptococcus salivarius	1	D51	-	1	D51	-
Bacteria	Firmicutes	Clostridia	Clostridiales	Catabacteriaceae	Catabacter	Catabacter hongkongensis	1	M10	-	1	M10	-
Bacteria	Firmicutes	Clostridia	Clostridiales	Clostridiaceae	Butyricicoccus	Butyricicoccus porcorum	1	E78	-	1	E78	-
Bacteria	Firmicutes	Clostridia	Clostridiales	Clostridiaceae	Clostridium	Clostridium phoceensis	1	K80	-	1	K80	-
Bacteria	Firmicutes	Clostridia	Clostridiales	Clostridiaceae	Clostridium	Clostridium sp. 26_21	1	M10	-	0		-
Bacteria	Firmicutes	Clostridia	Clostridiales	Clostridiaceae	Clostridium	Clostridium sp. 26_22	1	M10	-	0		-
Bacteria	Firmicutes	Clostridia	Clostridiales	Clostridiaceae	Clostridium	Clostridium sp. 28_12	1	M10	-	0		-
Bacteria	Firmicutes	Clostridia	Clostridiales	Clostridiaceae	Clostridium	Clostridium sp. CAG:1000	1	I10	-	0		-
Bacteria	Firmicutes	Clostridia	Clostridiales	Clostridiaceae	Clostridium	Clostridium sp. CAG:1193	1	I10	-	1	I10	-
Bacteria	Firmicutes	Clostridia	Clostridiales	Clostridiaceae	Clostridium	Clostridium sp. CAG:226	1	F41	-	0		-
Bacteria	Firmicutes	Clostridia	Clostridiales	Clostridiaceae	Clostridium	Clostridium sp. CAG:242	1	I10	-	0		-
Bacteria	Firmicutes	Clostridia	Clostridiales	Clostridiaceae	Clostridium	Clostridium sp. CAG:269	1	M10	-	0		-
Bacteria	Firmicutes	Clostridia	Clostridiales	Clostridiaceae	Clostridium	Clostridium sp. CAG:288	1	I10	-	1	I10	-
Bacteria	Firmicutes	Clostridia	Clostridiales	Clostridiaceae	Clostridium	Clostridium sp. CAG:307_30_263	1	I11	-	0		-
Bacteria	Firmicutes	Clostridia	Clostridiales	Clostridiaceae	Clostridium	Clostridium sp. CAG:356	1	M10	-	0		-
Bacteria	Firmicutes	Clostridia	Clostridiales	Clostridiaceae	Clostridium	Clostridium sp. CAG:389	1	M10	-	1	M10	-
Bacteria	Firmicutes	Clostridia	Clostridiales	Clostridiaceae	Clostridium	Clostridium sp. CAG:413	1	E10	-	1	E10	-
Bacteria	Firmicutes	Clostridia	Clostridiales	Clostridiaceae	Clostridium	Clostridium sp. CAG:524	1	I10	-	1	I10	-
Bacteria	Firmicutes	Clostridia	Clostridiales	Clostridiaceae	Clostridium	Clostridium sp. CAG:568	1	K58	-	0		-
Bacteria	Firmicutes	Clostridia	Clostridiales	Clostridiaceae	Clostridium	Clostridium sp. CAG:575	1	M10	-	0		-
Bacteria	Firmicutes	Clostridia	Clostridiales	Clostridiaceae	Clostridium	Clostridium sp. CAG:58	1	I10	-	1	I10	-
Bacteria	Firmicutes	Clostridia	Clostridiales	Clostridiaceae	Clostridium	Clostridium sp. CAG:632	1	E10	-	1	E10	-
Bacteria	Firmicutes	Clostridia	Clostridiales	Clostridiaceae	Clostridium	Clostridium sp. M62_1	1	K51	-	1	K51	-
Bacteria	Firmicutes	Clostridia	Clostridiales	Clostridiaceae	Clostridium	Clostridium sp. SN20	1	K51	-	1	K51	-
Bacteria	Firmicutes	Clostridia	Clostridiales	Clostridiaceae	Hungatella	Hungatella hathewayi	1	E11	-	1	E11	-
Bacteria	Firmicutes	Clostridia	Clostridiales	Clostridiaceae	Unclassified	Clostridiaceae bacterium OM08-6BH	1	E11	-	1	E11	-
Bacteria	Firmicutes	Clostridia	Clostridiales	Clostridiales Family XIII. Incertae Sedis	Unclassified	Clostridiales Family XIII bacterium	1	M10	-	0		-
Bacteria	Firmicutes	Clostridia	Clostridiales	Eubacteriaceae	Eubacterium	Eubacterium sp. AF22-8LB	1	F41	-	0		-
Bacteria	Firmicutes	Clostridia	Clostridiales	Eubacteriaceae	Eubacterium	Eubacterium sp. AM28-29	1	F41	-	0		-
Bacteria	Firmicutes	Clostridia	Clostridiales	Hungateiclostridiaceae	Petroclostridium	Petroclostridium xylanilyticum	1	M10	-	0		-
Bacteria	Firmicutes	Clostridia	Clostridiales	Hungateiclostridiaceae	Pseudoclostridium	Pseudoclostridium thermosuccinogenes	1	M10	-	0		-
Bacteria	Firmicutes	Clostridia	Clostridiales	Lachnospiraceae	Blautia	[Ruminococcus] gnavus	1	N18	-	1	N18	-
Bacteria	Firmicutes	Clostridia	Clostridiales	Lachnospiraceae	Blautia	[Ruminococcus] torques	1	M10	-	1	M10	-
Bacteria	Firmicutes	Clostridia	Clostridiales	Lachnospiraceae	Blautia	Blautia sp. CAG:37	1	I11	-	0		-
Bacteria	Firmicutes	Clostridia	Clostridiales	Lachnospiraceae	Dorea	Dorea longicatena	1	M10	-	0		-
Bacteria	Firmicutes	Clostridia	Clostridiales	Lachnospiraceae	Dorea	Dorea sp. 42_8	1	M10	-	1	M10	-
Bacteria	Firmicutes	Clostridia	Clostridiales	Lachnospiraceae	Tyzzerella	Tyzzerella nexilis	1	K51	-	1	K51	-
Bacteria	Firmicutes	Clostridia	Clostridiales	Lachnospiraceae	Unclassified	Lachnospiraceae bacterium 10-1	1	E10	-	1	E10	-
Bacteria	Firmicutes	Clostridia	Clostridiales	Oscillospiraceae	Oscillibacter	Oscillibacter sp. CAG:241_62_21	1	M10	-	0		-
Bacteria	Firmicutes	Clostridia	Clostridiales	Oscillospiraceae	Oscillibacter	Oscillibacter sp. PEA192	1	I10	-	0		-
Bacteria	Firmicutes	Clostridia	Clostridiales	Peptococcaceae	Dehalobacter	Dehalobacter sp. FTH1	1	M10	-	1	M10	-
Bacteria	Firmicutes	Clostridia	Clostridiales	Peptostreptococcaceae	Clostridioides	Clostridioides difficile	1	K51	-	1	K51	-
Bacteria	Firmicutes	Clostridia	Clostridiales	Peptostreptococcaceae	Intestinibacter	Intestinibacter bartlettii	1	E11	-	1	E11	-
Bacteria	Firmicutes	Clostridia	Clostridiales	Peptostreptococcaceae	Romboutsia	Romboutsia timonensis	1	E11	-	1	E11	-
Bacteria	Firmicutes	Clostridia	Clostridiales	Ruminococcaceae	Agathobaculum	Agathobaculum butyriciproducens	1	B18	-	1	B18	-
Bacteria	Firmicutes	Clostridia	Clostridiales	Ruminococcaceae	Anaerotruncus	Anaerotruncus sp. CAG:390	1	M10	-	0		-
Bacteria	Firmicutes	Clostridia	Clostridiales	Ruminococcaceae	Faecalibacterium	Faecalibacterium sp. CAG:1138	1	I10	-	1	I10	-
Bacteria	Firmicutes	Clostridia	Clostridiales	Ruminococcaceae	Flavonifractor	Flavonifractor sp. An306	1	E10	-	1	E10	-
Bacteria	Firmicutes	Clostridia	Clostridiales	Ruminococcaceae	Neglecta	Neglecta timonensis	1	M10	-	1	M10	-
Bacteria	Firmicutes	Clostridia	Clostridiales	Ruminococcaceae	Papillibacter	Papillibacter cinnamivorans	1	M10	-	1	M10	-
Bacteria	Firmicutes	Clostridia	Clostridiales	Ruminococcaceae	Pseudoflavonifractor	Pseudoflavonifractor capillosus	1	K51	-	1	K51	-
Bacteria	Firmicutes	Clostridia	Clostridiales	Ruminococcaceae	Ruminococcus	Ruminococcus albus	1	E11	-	0		-
Bacteria	Firmicutes	Clostridia	Clostridiales	Ruminococcaceae	Ruminococcus	Ruminococcus sp. CAG:177	1	F41	-	1	F41	-
Bacteria	Firmicutes	Clostridia	Clostridiales	Ruminococcaceae	Ruminococcus	Ruminococcus sp. CAG:353	1	I11	-	0		-
Bacteria	Firmicutes	Clostridia	Clostridiales	Ruminococcaceae	Ruminococcus	Ruminococcus sp. CAG:382	1	E10	-	1	E10	-
Bacteria	Firmicutes	Clostridia	Clostridiales	Ruminococcaceae	Ruminococcus	Ruminococcus sp. HUN007	1	I10	-	0		-
Bacteria	Firmicutes	Clostridia	Clostridiales	Ruminococcaceae	Unclassified	Ruminococcaceae bacterium AM28-23LB	1	K51	-	1	K51	-
Bacteria	Firmicutes	Clostridia	Clostridiales	Ruminococcaceae	Unclassified	Ruminococcaceae bacterium FB2012	1	M10	-	1	M10	-
Bacteria	Firmicutes	Clostridia	Clostridiales	Ruminococcaceae	Unclassified	Ruminococcaceae bacterium Marseille-P2935	1	M10	-	1	M10	-
Bacteria	Firmicutes	Clostridia	Clostridiales	Unclassified	Unclassified	butyrate-producing bacterium SS3_4	1	D51	-	1	D51	-
Bacteria	Firmicutes	Clostridia	Clostridiales	Unclassified	Unclassified	Clostridiales bacterium 43-6	1	M10	-	1	M10	-
Bacteria	Firmicutes	Clostridia	Clostridiales	Unclassified	Unclassified	Clostridiales bacterium 59_14	1	M10	-	0		-
Bacteria	Firmicutes	Clostridia	Clostridiales	Unclassified	Unclassified	Clostridiales bacterium GWF2_38_85	1	M10	-	0		-
Bacteria	Firmicutes	Clostridia	Clostridiales	Unclassified	Unclassified	Clostridiales bacterium Marseille-P2846	1	F41	-	0		-
Bacteria	Firmicutes	Clostridia	Thermoanaerobacterales	Thermoanaerobacteraceae	Moorella	Moorella thermoacetica	1	I10	-	1	I10	-
Bacteria	Firmicutes	Clostridia	Unclassified	Unclassified	Unclassified	Clostridia bacterium	1	M10	-	1	M10	-
Bacteria	Firmicutes	Erysipelotrichia	Erysipelotrichales	Erysipelotrichaceae	Catenibacterium	Catenibacterium mitsuokai	1	I10	-	0		-
Bacteria	Firmicutes	Erysipelotrichia	Erysipelotrichales	Erysipelotrichaceae	Unclassified	Erysipelotrichaceae bacterium AF19-24AC	1	I10	-	0		-
Bacteria	Firmicutes	Negativicutes	Acidaminococcales	Acidaminococcaceae	Acidaminococcus	Acidaminococcus sp. CAG:917	1	I10	-	1	I10	-
Bacteria	Firmicutes	Negativicutes	Veillonellales	Veillonellaceae	Veillonella	Veillonella parvula	1	D51	-	1	D51	-
Bacteria	Firmicutes	Unclassified	Unclassified	Unclassified	Unclassified	Firmicutes bacterium AF16-15	1	E11	-	1	E11	-
Bacteria	Firmicutes	Unclassified	Unclassified	Unclassified	Unclassified	Firmicutes bacterium CAG:110	1	M10	-	0		-
Bacteria	Firmicutes	Unclassified	Unclassified	Unclassified	Unclassified	Firmicutes bacterium CAG:110_56_8	1	K35	-	1	K35	-
Bacteria	Firmicutes	Unclassified	Unclassified	Unclassified	Unclassified	Firmicutes bacterium CAG:114	1	K51	-	1	K51	-
Bacteria	Firmicutes	Unclassified	Unclassified	Unclassified	Unclassified	Firmicutes bacterium CAG:124	1	M10	-	0		-
Bacteria	Firmicutes	Unclassified	Unclassified	Unclassified	Unclassified	Firmicutes bacterium CAG:176	1	M10	-	0		-
Bacteria	Firmicutes	Unclassified	Unclassified	Unclassified	Unclassified	Firmicutes bacterium CAG:176_63_11	1	M10	-	1	M10	-
Bacteria	Firmicutes	Unclassified	Unclassified	Unclassified	Unclassified	Firmicutes bacterium CAG:24	1	E11	-	1	E11	-
Bacteria	Firmicutes	Unclassified	Unclassified	Unclassified	Unclassified	Firmicutes bacterium CAG:24053_14	1	M10	-	1	M10	-
Bacteria	Firmicutes	Unclassified	Unclassified	Unclassified	Unclassified	Firmicutes bacterium CAG:313	1	I10	-	0		-
Bacteria	Firmicutes	Unclassified	Unclassified	Unclassified	Unclassified	Firmicutes bacterium CAG:449	1	M10	-	1	M10	-
Bacteria	Firmicutes	Unclassified	Unclassified	Unclassified	Unclassified	Firmicutes bacterium CAG:460	1	I10	-	0		-
Bacteria	Firmicutes	Unclassified	Unclassified	Unclassified	Unclassified	Firmicutes bacterium CAG:95	1	I10	-	1	I10	-
Bacteria	Firmicutes	Unclassified	Unclassified	Unclassified	Unclassified	Firmicutes bacterium HGW-Firmicutes-16	1	M10	-	1	M10	-
Bacteria	Lentisphaerae	Lentisphaeria	Victivallales	Unclassified	Unclassified	Victivallales bacterium CCUG 44730	1	K58	-	0		-
Bacteria	Lentisphaerae	Unclassified	Unclassified	Unclassified	Unclassified	Lentisphaerae bacterium	1	K21	-	0		-
Bacteria	Proteobacteria	Acidithiobacillia	Acidithiobacillales	Acidithiobacillaceae	Acidithiobacillus	Acidithiobacillus ferrivorans	1	I10	-	1	I10	-
Bacteria	Proteobacteria	Alphaproteobacteria	Rhodobacterales	Rhodobacteraceae	Pseudooceanicola	Pseudooceanicola batsensis	1	I10	-	0		-
Bacteria	Proteobacteria	Alphaproteobacteria	Rhodobacterales	Rhodobacteraceae	Salipiger	Salipiger bermudensis	1	I10	-	0		-
Bacteria	Proteobacteria	Alphaproteobacteria	Rhodospirillales	Acetobacteraceae	Acidiphilium	Acidiphilium sp. CAG:727	1	I10	-	0		-
Bacteria	Proteobacteria	Betaproteobacteria	Burkholderiales	Alcaligenaceae	Bordetella	Bordetella hinzii	1	M10	-	1	M10	-
Bacteria	Proteobacteria	Betaproteobacteria	Burkholderiales	Burkholderiaceae	Burkholderia	Burkholderia cenocepacia	1	K58	-	0		-
Bacteria	Proteobacteria	Betaproteobacteria	Burkholderiales	Burkholderiaceae	Burkholderia	Burkholderia mallei	1	M10	-	1	M10	-
Bacteria	Proteobacteria	Betaproteobacteria	Burkholderiales	Sutterellaceae	Duodenibacillus	Duodenibacillus massiliensis	1	J20	-	0		-
Bacteria	Proteobacteria	Betaproteobacteria	Burkholderiales	Sutterellaceae	Parasutterella	Parasutterella excrementihominis	1	I10	-	1	I10	-
Bacteria	Proteobacteria	Betaproteobacteria	Burkholderiales	Sutterellaceae	Parasutterella	Parasutterella excrementihominis CAG:233	1	I10	-	1	I10	-
Bacteria	Proteobacteria	Betaproteobacteria	Burkholderiales	Sutterellaceae	Sutterella	Sutterella sp. CAG:397	1	J20	-	0		-
Bacteria	Proteobacteria	Betaproteobacteria	Burkholderiales	Sutterellaceae	Sutterella	Sutterella wadsworthensis CAG:135	1	M10	-	1	M10	-
Bacteria	Proteobacteria	Betaproteobacteria	Burkholderiales	Unclassified	Unclassified	Burkholderiales bacterium	1	I10	-	1	I10	-
Bacteria	Proteobacteria	Betaproteobacteria	Burkholderiales	Unclassified	Unclassified	Burkholderiales bacterium 1_1_47	1	I10	-	0		-
Bacteria	Proteobacteria	Betaproteobacteria	Neisseriales	Neisseriaceae	Neisseria	Neisseria sp. HMSC06F02	1	K51	-	1	K51	-
Bacteria	Proteobacteria	Betaproteobacteria	Rhodocyclales	Zoogloeaceae	Thauera	Thauera phenylacetica	1	M10	-	1	M10	-
Bacteria	Proteobacteria	Betaproteobacteria	Unclassified	Unclassified	Candidatus Accumulibacter	Candidatus Accumulibacter sp. BA-91	1	C18	-	1	C18	-
Bacteria	Proteobacteria	Betaproteobacteria	Unclassified	Unclassified	Candidatus Accumulibacter	Candidatus Accumulibacter sp. SK-11	1	M10	-	0		-
Bacteria	Proteobacteria	Deltaproteobacteria	Desulfovibrionales	Desulfovibrionaceae	Bilophila	Bilophila sp. 4_1_30	1	M10	-	1	M10	-
Bacteria	Proteobacteria	Deltaproteobacteria	Myxococcales	Myxococcaceae	Corallococcus	Corallococcus sp. CAG:1435	1	I10	-	0		-
Bacteria	Proteobacteria	Gammaproteobacteria	Enterobacterales	Enterobacteriaceae	Klebsiella	Klebsiella variicola	1	K50	-	1	K50	-
Bacteria	Proteobacteria	Gammaproteobacteria	Pseudomonadales	Pseudomonadaceae	Pseudomonas	Pseudomonas amygdali	1	I11	-	1	I11	-
Bacteria	Proteobacteria	Gammaproteobacteria	Pseudomonadales	Pseudomonadaceae	Pseudomonas	Pseudomonas fluorescens	1	I10	-	1	I10	-
Bacteria	Proteobacteria	Unclassified	Unclassified	Unclassified	Unclassified	Proteobacteria bacterium CAG:139	1	I10	-	1	I10	-
Bacteria	Tenericutes	Mollicutes	Mycoplasmatales	Mycoplasmataceae	Mycoplasma	Mycoplasma sp. CAG:956	1	I11	-	1	I11	-
Bacteria	Tenericutes	Unclassified	Unclassified	Unclassified	Unclassified	Tenericutes bacterium HGW-Tenericutes-4	1	I10	-	0		-
Eukaryota	Ascomycota	Sordariomycetes	Hypocreales	Cordycipitaceae	Beauveria	Beauveria bassiana	1	I11	-	1	I11	-
Eukaryota	Nematoda	Chromadorea	Rhabditida	Rhabditidae	Diploscapter	Diploscapter pachys	1	M10	-	0		-
Eukaryota	Streptophyta	Unclassified	Malpighiales	Euphorbiaceae	Ricinus	Ricinus communis	1	I11	-	1	I11	-
Viruses	Unclassified	Unclassified	Unclassified	Unclassified	Unclassified	unidentified phage	1	M10	-	1	M10	-

## Sheet: Shared KOs
KO	Pathways	Sub-pathways	Metabolic pathways	n_Excl_AB	diseases_Excl_AB	common_dysbiosis_ExclAB	n_Incl_AB	diseases_Incl_AB	common_dysbiosis_InclAB
K03088	Brite Hierarchies	Protein families: genetic information processing	Transcription machinery [BR:ko03021]	4	I10, I11, K50, M10	Yes	1	K50	-
K00091	Not Included in Pathway or Brite	Unclassified: metabolism	Enzymes with EC numbers	3	I10, I11, M10	Yes	2	I10, M10	-
K00561	Brite Hierarchies | Brite Hierarchies	Protein families: genetic information processing | Protein families: signaling and cellular processes	Ribosome biogenesis [BR:ko03009] | Antimicrobial resistance genes [BR:ko01504]	3	J02, J20, K21	Yes	0		-
K00648	Metabolism | Brite Hierarchies	Lipid metabolism | Protein families: metabolism	Fatty acid biosynthesis [PATH:ko00061] | Lipid biosynthesis proteins [BR:ko01004]	3	I10, I11, M10	Yes	1	I11	-
K00756	Metabolism	Nucleotide metabolism	Pyrimidine metabolism [PATH:ko00240]	3	I10, I11, M10	Yes	1	I10	-
K00943	Metabolism	Nucleotide metabolism	Pyrimidine metabolism [PATH:ko00240]	3	I10, K21, M10	Yes	0		-
K01187	Metabolism | Metabolism	Carbohydrate metabolism | Carbohydrate metabolism	Galactose metabolism [PATH:ko00052] | Starch and sucrose metabolism [PATH:ko00500]	3	I10, K21, M10	Yes	0		-
K02217	Not Included in Pathway or Brite	Unclassified: metabolism	Enzymes with EC numbers	3	I10, K50, M10	Yes	1	K50	-
K02238	Brite Hierarchies	Protein families: signaling and cellular processes	Secretion system [BR:ko02044]	3	I10, I11, M10	Yes	2	I10, I11	-
K07042	Brite Hierarchies	Protein families: genetic information processing	Ribosome biogenesis [BR:ko03009]	3	I10, I11, K21	Yes	0		-
K09789	Metabolism	Metabolism of cofactors and vitamins	Biotin metabolism [PATH:ko00780]	3	I10, K21, M10	Yes	1	M10	-
K10112	Environmental Information Processing | Brite Hierarchies	Membrane transport | Protein families: signaling and cellular processes	ABC transporters [PATH:ko02010] | Transporters [BR:ko02000]	3	I10, I11, M10	Yes	2	I10, I11	-
K13652	Brite Hierarchies	Protein families: genetic information processing	Transcription factors [BR:ko03000]	3	F41, I10, M10	Yes	1	M10	-
K14540	Brite Hierarchies	Protein families: genetic information processing	Ribosome biogenesis [BR:ko03009]	3	I10, I11, M10	Yes	1	I11	-
K16211	Brite Hierarchies	Protein families: signaling and cellular processes	Transporters [BR:ko02000]	3	E10, K50, K51	Yes	3	E10, K50, K51	Yes
K19158	Brite Hierarchies	Protein families: signaling and cellular processes	Prokaryotic defense system [BR:ko02048]	3	F41, I10, M10	Yes	0		-
K00554	Brite Hierarchies	Protein families: genetic information processing	Transfer RNA biogenesis [BR:ko03016]	2	I10, M10	-	0		-
K00803	Metabolism | Cellular Processes	Lipid metabolism | Transport and catabolism	Ether lipid metabolism [PATH:ko00565] | Peroxisome [PATH:ko04146]	2	I10, M10	-	1	M10	-
K00833	Metabolism | Brite Hierarchies	Metabolism of cofactors and vitamins | Protein families: metabolism	Biotin metabolism [PATH:ko00780] | Amino acid related enzymes [BR:ko01007]	2	I11, M10	-	1	M10	-
K00963	Metabolism | Metabolism | Metabolism | Metabolism | Metabolism	Carbohydrate metabolism | Carbohydrate metabolism | Carbohydrate metabolism | Carbohydrate metabolism | Glycan biosynthesis and metabolism	Pentose and glucuronate interconversions [PATH:ko00040] | Galactose metabolism [PATH:ko00052] | Starch and sucrose metabolism [PATH:ko00500] | Amino sugar and nucleotide sugar metabolism [PATH:ko00520] | O-Antigen nucleotide sugar biosynthesis [PATH:ko00541]	2	I10, K21	-	0		-
K01079	Metabolism | Metabolism | Brite Hierarchies	Energy metabolism | Amino acid metabolism | Protein families: metabolism	Methane metabolism [PATH:ko00680] | Glycine, serine and threonine metabolism [PATH:ko00260] | Protein phosphatases and associated proteins [BR:ko01009]	2	I10, M10	-	1	M10	-
K01130	Metabolism	Lipid metabolism	Sphingolipid metabolism [PATH:ko00600]	2	K50, M10	-	1	K50	-
K01192	Metabolism | Cellular Processes	Glycan biosynthesis and metabolism | Transport and catabolism	Other glycan degradation [PATH:ko00511] | Lysosome [PATH:ko04142]	2	K50, M10	-	0		-
K01241	Metabolism	Nucleotide metabolism	Purine metabolism [PATH:ko00230]	2	I10, M10	-	0		-
K01424	Metabolism | Metabolism	Amino acid metabolism | Metabolism of other amino acids	Alanine, aspartate and glutamate metabolism [PATH:ko00250] | Cyanoamino acid metabolism [PATH:ko00460]	2	I10, I11	-	1	I10	-
K01491	Metabolism | Metabolism	Energy metabolism | Metabolism of cofactors and vitamins	Carbon fixation pathways in prokaryotes [PATH:ko00720] | One carbon pool by folate [PATH:ko00670]	2	K50, M10	-	1	K50	-
K01546	Environmental Information Processing	Signal transduction	Two-component system [PATH:ko02020]	2	I10, M10	-	1	M10	-
K01560	Metabolism | Metabolism	Xenobiotics biodegradation and metabolism | Xenobiotics biodegradation and metabolism	Chloroalkane and chloroalkene degradation [PATH:ko00625] | Chlorocyclohexane and chlorobenzene degradation [PATH:ko00361]	2	F41, M10	-	1	F41	-
K01573	Metabolism | Brite Hierarchies	Carbohydrate metabolism | Protein families: signaling and cellular processes	Pyruvate metabolism [PATH:ko00620] | Transporters [BR:ko02000]	2	I10, M10	-	1	M10	-
K01596	Metabolism | Metabolism | Metabolism | Environmental Information Processing | Environmental Information Processing | Environmental Information Processing | Organismal Systems | Organismal Systems | Organismal Systems | Organismal Systems | Organismal Systems | Human Diseases	Carbohydrate metabolism | Carbohydrate metabolism | Carbohydrate metabolism | Signal transduction | Signal transduction | Signal transduction | Endocrine system | Endocrine system | Endocrine system | Endocrine system | Excretory system | Endocrine and metabolic disease	Glycolysis / Gluconeogenesis [PATH:ko00010] | Citrate cycle (TCA cycle) [PATH:ko00020] | Pyruvate metabolism [PATH:ko00620] | FoxO signaling pathway [PATH:ko04068] | PI3K-Akt signaling pathway [PATH:ko04151] | AMPK signaling pathway [PATH:ko04152] | Insulin signaling pathway [PATH:ko04910] | Glucagon signaling pathway [PATH:ko04922] | Adipocytokine signaling pathway [PATH:ko04920] | PPAR signalin…	2	K21, M10	-	1	M10	-
K01628	Metabolism | Metabolism	Carbohydrate metabolism | Carbohydrate metabolism	Pentose and glucuronate interconversions [PATH:ko00040] | Fructose and mannose metabolism [PATH:ko00051]	2	I10, M10	-	0		-
K01715	Metabolism	Carbohydrate metabolism	Butanoate metabolism [PATH:ko00650]	2	E78, I11	-	2	E78, I11	-
K01839	Metabolism | Metabolism	Carbohydrate metabolism | Nucleotide metabolism	Pentose phosphate pathway [PATH:ko00030] | Purine metabolism [PATH:ko00230]	2	I10, I11	-	1	I11	-
K02002	Environmental Information Processing | Brite Hierarchies	Membrane transport | Protein families: signaling and cellular processes	ABC transporters [PATH:ko02010] | Transporters [BR:ko02000]	2	F41, M10	-	1	M10	-
K02004	Brite Hierarchies	Protein families: signaling and cellular processes	Transporters [BR:ko02000]	2	I10, M10	-	1	I10	-
K02123	Metabolism	Energy metabolism	Oxidative phosphorylation [PATH:ko00190]	2	I10, M10	-	0		-
K02169	Metabolism	Metabolism of cofactors and vitamins	Biotin metabolism [PATH:ko00780]	2	I10, M10	-	0		-
K02188	Metabolism	Metabolism of cofactors and vitamins	Porphyrin and chlorophyll metabolism [PATH:ko00860]	2	I10, M10	-	1	M10	-
K02232	Metabolism	Metabolism of cofactors and vitamins	Porphyrin and chlorophyll metabolism [PATH:ko00860]	2	I10, M10	-	0		-
K02481	Brite Hierarchies	Protein families: signaling and cellular processes	Two-component system [BR:ko02022]	2	I10, M10	-	1	M10	-
K02484	Brite Hierarchies | Brite Hierarchies	Protein families: metabolism | Protein families: signaling and cellular processes	Protein kinases [BR:ko01001] | Two-component system [BR:ko02022]	2	I11, M10	-	2	I11, M10	-
K02843	Metabolism | Brite Hierarchies	Glycan biosynthesis and metabolism | Protein families: metabolism	Lipopolysaccharide biosynthesis [PATH:ko00540] | Lipopolysaccharide biosynthesis proteins [BR:ko01005]	2	I11, M10	-	1	M10	-
K03091	Brite Hierarchies	Protein families: genetic information processing	Transcription machinery [BR:ko03021]	2	I11, M10	-	2	I11, M10	-
K03216	Brite Hierarchies	Protein families: genetic information processing	Transfer RNA biogenesis [BR:ko03016]	2	I10, K21	-	0		-
K03296	Not Included in Pathway or Brite	Unclassified: signaling and cellular processes	Transport	2	I10, M10	-	1	M10	-
K03387	Not Included in Pathway or Brite	Unclassified: metabolism	Enzymes with EC numbers	2	I10, M10	-	1	M10	-
K03394	Metabolism	Metabolism of cofactors and vitamins	Porphyrin and chlorophyll metabolism [PATH:ko00860]	2	I10, M10	-	0		-
K03466	Brite Hierarchies	Protein families: genetic information processing	Chromosome and associated proteins [BR:ko03036]	2	I10, M10	-	2	I10, M10	-
K03551	Genetic Information Processing | Brite Hierarchies	Replication and repair | Protein families: genetic information processing	Homologous recombination [PATH:ko03440] | DNA repair and recombination proteins [BR:ko03400]	2	K21, M10	-	0		-
K03585	Human Diseases | Human Diseases | Brite Hierarchies | Brite Hierarchies | Brite Hierarchies	Drug resistance: antimicrobial | Drug resistance: antimicrobial | Protein families: genetic information processing | Protein families: signaling and cellular processes | Protein families: signaling and cellular processes	beta-Lactam resistance [PATH:ko01501] | Cationic antimicrobial peptide (CAMP) resistance [PATH:ko01503] | Chromosome and associated proteins [BR:ko03036] | Transporters [BR:ko02000] | Antimicrobial resistance genes [BR:ko01504]	2	I10, M10	-	0		-
K03596	Human Diseases	Infectious disease: bacterial	Legionellosis [PATH:ko05134]	2	I10, M10	-	0		-
K03644	Metabolism	Metabolism of cofactors and vitamins	Lipoic acid metabolism [PATH:ko00785]	2	I10, M10	-	1	M10	-
K03686	Brite Hierarchies | Brite Hierarchies	Protein families: genetic information processing | Protein families: genetic information processing	Chaperones and folding catalysts [BR:ko03110] | Mitochondrial biogenesis [BR:ko03029]	2	K50, M10	-	1	K50	-
K03801	Metabolism	Metabolism of cofactors and vitamins	Lipoic acid metabolism [PATH:ko00785]	2	I10, M10	-	0		-
K03893	Brite Hierarchies	Protein families: signaling and cellular processes	Transporters [BR:ko02000]	2	I10, M10	-	0		-
K04047	Brite Hierarchies	Protein families: genetic information processing	Chromosome and associated proteins [BR:ko03036]	2	I10, M10	-	1	M10	-
K05306	Metabolism	Metabolism of other amino acids	Phosphonate and phosphinate metabolism [PATH:ko00440]	2	I10, M10	-	0		-
K06024	Brite Hierarchies	Protein families: genetic information processing	Chromosome and associated proteins [BR:ko03036]	2	I10, I11	-	1	I11	-
K06283	Brite Hierarchies	Protein families: genetic information processing	Transcription factors [BR:ko03000]	2	I11, M10	-	0		-
K06398	Not Included in Pathway or Brite	Unclassified: signaling and cellular processes	Cell growth	2	I11, M10	-	2	I11, M10	-
K06405	Not Included in Pathway or Brite	Unclassified: signaling and cellular processes	Cell growth	2	I11, M10	-	1	M10	-
K06406	Not Included in Pathway or Brite	Unclassified: signaling and cellular processes	Cell growth	2	I11, M10	-	2	I11, M10	-
K06407	Not Included in Pathway or Brite	Unclassified: signaling and cellular processes	Cell growth	2	I11, M10	-	1	M10	-
K06960	Not Included in Pathway or Brite	Poorly characterized	Function unknown	2	I11, M10	-	1	I11	-
K07017	Not Included in Pathway or Brite	Poorly characterized	Function unknown	2	I10, M10	-	0		-
K07052	Not Included in Pathway or Brite	Poorly characterized	Function unknown	2	I10, I11	-	0		-
K07058	Not Included in Pathway or Brite	Poorly characterized	General function prediction only	2	I10, M10	-	0		-
K07071	Not Included in Pathway or Brite	Poorly characterized	Function unknown	2	K50, M10	-	1	K50	-
K07148	Not Included in Pathway or Brite	Poorly characterized	Function unknown	2	I11, M10	-	1	M10	-
K07387	Brite Hierarchies	Protein families: metabolism	Peptidases and inhibitors [BR:ko01002]	2	E11, M10	-	0		-
K07699	Environmental Information Processing | Cellular Processes | Brite Hierarchies	Signal transduction | Cellular community - prokaryotes | Protein families: signaling and cellular processes	Two-component system [PATH:ko02020] | Quorum sensing [PATH:ko02024] | Two-component system [BR:ko02022]	2	I11, M10	-	2	I11, M10	-
K07742	Not Included in Pathway or Brite	Poorly characterized	Function unknown	2	I11, M10	-	1	I11	-
K08602	Brite Hierarchies	Protein families: metabolism	Peptidases and inhibitors [BR:ko01002]	2	I10, I11	-	0		-
K09123	Metabolism	Amino acid metabolism	Arginine and proline metabolism [PATH:ko00330]	2	I10, M10	-	2	I10, M10	-
K09747	Not Included in Pathway or Brite	Unclassified: genetic information processing	Others	2	I10, I11	-	1	I11	-
K09758	Metabolism | Metabolism	Amino acid metabolism | Amino acid metabolism	Alanine, aspartate and glutamate metabolism [PATH:ko00250] | Cysteine and methionine metabolism [PATH:ko00270]	2	I10, M10	-	0		-
K09790	Not Included in Pathway or Brite	Poorly characterized	Function unknown	2	I10, M10	-	1	M10	-
K09888	Brite Hierarchies	Protein families: genetic information processing	Chromosome and associated proteins [BR:ko03036]	2	I10, M10	-	0		-
K11145	Brite Hierarchies	Protein families: genetic information processing	Ribosome biogenesis [BR:ko03009]	2	I11, M10	-	1	I11	-
K11527	Brite Hierarchies | Brite Hierarchies	Protein families: metabolism | Protein families: signaling and cellular processes	Protein kinases [BR:ko01001] | Two-component system [BR:ko02022]	2	I10, M10	-	0		-
K12574	Genetic Information Processing | Brite Hierarchies	Folding, sorting and degradation | Protein families: genetic information processing	RNA degradation [PATH:ko03018] | Messenger RNA biogenesis [BR:ko03019]	2	I10, M10	-	0		-
K12942	Not Included in Pathway or Brite	Unclassified: metabolism	Cofactor metabolism	2	I11, M10	-	0		-
K13292	Not Included in Pathway or Brite	Unclassified: metabolism	Enzymes with EC numbers	2	I11, M10	-	0		-
K15532	Not Included in Pathway or Brite	Unclassified: metabolism	Enzymes with EC numbers	2	K50, M10	-	1	M10	-
K16089	Brite Hierarchies	Protein families: signaling and cellular processes	Transporters [BR:ko02000]	2	I10, M10	-	1	M10	-
K16212	Not Included in Pathway or Brite	Unclassified: metabolism	Enzymes with EC numbers	2	I11, K50	-	1	K50	-
K16213	Not Included in Pathway or Brite	Unclassified: metabolism	Enzymes with EC numbers	2	I11, M10	-	1	I11	-
K16328	Metabolism	Nucleotide metabolism	Pyrimidine metabolism [PATH:ko00240]	2	F41, M10	-	1	F41	-
K16329	Metabolism	Nucleotide metabolism	Pyrimidine metabolism [PATH:ko00240]	2	I10, M10	-	0		-
K17073	Environmental Information Processing | Brite Hierarchies	Membrane transport | Protein families: signaling and cellular processes	ABC transporters [PATH:ko02010] | Transporters [BR:ko02000]	2	I11, M10	-	0		-
K18139	Cellular Processes | Human Diseases | Brite Hierarchies | Brite Hierarchies	Cellular community - prokaryotes | Drug resistance: antimicrobial | Protein families: signaling and cellular processes | Protein families: signaling and cellular processes	Quorum sensing [PATH:ko02024] | beta-Lactam resistance [PATH:ko01501] | Transporters [BR:ko02000] | Antimicrobial resistance genes [BR:ko01504]	2	I10, M10	-	0		-
K18581	Not Included in Pathway or Brite	Unclassified: metabolism	Enzymes with EC numbers	2	F41, K21	-	0		-
K18672	Not Included in Pathway or Brite	Unclassified: metabolism	Enzymes with EC numbers	2	I10, I11	-	0		-
K19052	Not Included in Pathway or Brite	Unclassified: metabolism	Enzymes with EC numbers	2	F41, M10	-	1	M10	-
K21572	Brite Hierarchies	Protein families: signaling and cellular processes	Transporters [BR:ko02000]	2	I11, K21	-	1	I11	-
K21600	Brite Hierarchies	Protein families: genetic information processing	Transcription factors [BR:ko03000]	2	I11, M10	-	1	I11	-
K00001	Metabolism | Metabolism | Metabolism | Metabolism | Metabolism | Metabolism | Metabolism | Metabolism | Metabolism	Carbohydrate metabolism | Carbohydrate metabolism | Lipid metabolism | Amino acid metabolism | Metabolism of cofactors and vitamins | Xenobiotics biodegradation and metabolism | Xenobiotics biodegradation and metabolism | Xenobiotics biodegradation and metabolism | Xenobiotics biodegradation and metabolism	Glycolysis / Gluconeogenesis [PATH:ko00010] | Pyruvate metabolism [PATH:ko00620] | Fatty acid degradation [PATH:ko00071] | Tyrosine metabolism [PATH:ko00350] | Retinol metabolism [PATH:ko00830] | Chloroalkane and chloroalkene degradation [PATH:ko00625] | Naphthalene degradation [PATH:ko00626] | Metabolism of xenobiotics by cytochrome P450 [PATH:ko00980] | Drug metabolism - cytochrome P450 [PATH:k…	1	J35	-	0		-
K00024	Metabolism | Metabolism | Metabolism | Metabolism | Metabolism | Metabolism | Metabolism	Carbohydrate metabolism | Carbohydrate metabolism | Carbohydrate metabolism | Energy metabolism | Energy metabolism | Energy metabolism | Amino acid metabolism	Citrate cycle (TCA cycle) [PATH:ko00020] | Pyruvate metabolism [PATH:ko00620] | Glyoxylate and dicarboxylate metabolism [PATH:ko00630] | Carbon fixation in photosynthetic organisms [PATH:ko00710] | Carbon fixation pathways in prokaryotes [PATH:ko00720] | Methane metabolism [PATH:ko00680] | Cysteine and methionine metabolism [PATH:ko00270]	1	I11	-	0		-
K00033	Metabolism | Metabolism	Carbohydrate metabolism | Metabolism of other amino acids	Pentose phosphate pathway [PATH:ko00030] | Glutathione metabolism [PATH:ko00480]	1	M10	-	1	M10	-
K00036	Metabolism | Metabolism | Human Diseases | Human Diseases | Brite Hierarchies	Carbohydrate metabolism | Metabolism of other amino acids | Cancer: overview | Cardiovascular disease | Protein families: signaling and cellular processes	Pentose phosphate pathway [PATH:ko00030] | Glutathione metabolism [PATH:ko00480] | Central carbon metabolism in cancer [PATH:ko05230] | Diabetic cardiomyopathy [PATH:ko05415] | Exosome [BR:ko04147]	1	M10	-	1	M10	-
K00041	Metabolism	Carbohydrate metabolism	Pentose and glucuronate interconversions [PATH:ko00040]	1	M10	-	0		-
K00128	Metabolism | Metabolism | Metabolism | Metabolism | Metabolism | Metabolism | Metabolism | Metabolism | Metabolism | Metabolism | Metabolism | Metabolism | Metabolism | Metabolism | Metabolism	Carbohydrate metabolism | Carbohydrate metabolism | Carbohydrate metabolism | Lipid metabolism | Lipid metabolism | Amino acid metabolism | Amino acid metabolism | Amino acid metabolism | Amino acid metabolism | Amino acid metabolism | Metabolism of other amino acids | Metabolism of cofactors and vitamins | Metabolism of terpenoids and polyketides | Metabolism of terpenoids and polyketides | Xeno…	Glycolysis / Gluconeogenesis [PATH:ko00010] | Ascorbate and aldarate metabolism [PATH:ko00053] | Pyruvate metabolism [PATH:ko00620] | Fatty acid degradation [PATH:ko00071] | Glycerolipid metabolism [PATH:ko00561] | Valine, leucine and isoleucine degradation [PATH:ko00280] | Lysine degradation [PATH:ko00310] | Arginine and proline metabolism [PATH:ko00330] | Histidine metabolism [PATH:ko00340] | T…	1	I10	-	0		-
K00156	Metabolism	Carbohydrate metabolism	Pyruvate metabolism [PATH:ko00620]	1	M10	-	1	M10	-
K00210	#N/A	#N/A	#N/A	1	E10	-	1	E10	-
K00226	Metabolism	Nucleotide metabolism	Pyrimidine metabolism [PATH:ko00240]	1	M10	-	1	M10	-
K00243	Not Included in Pathway or Brite	Poorly characterized	Function unknown	1	M10	-	0		-
K00281	Metabolism | Metabolism	Carbohydrate metabolism | Amino acid metabolism	Glyoxylate and dicarboxylate metabolism [PATH:ko00630] | Glycine, serine and threonine metabolism [PATH:ko00260]	1	M10	-	1	M10	-
K00282	Metabolism | Metabolism	Carbohydrate metabolism | Amino acid metabolism	Glyoxylate and dicarboxylate metabolism [PATH:ko00630] | Glycine, serine and threonine metabolism [PATH:ko00260]	1	M10	-	1	M10	-
K00283	Metabolism | Metabolism	Carbohydrate metabolism | Amino acid metabolism	Glyoxylate and dicarboxylate metabolism [PATH:ko00630] | Glycine, serine and threonine metabolism [PATH:ko00260]	1	M10	-	1	M10	-
K00290	Metabolism | Metabolism	Amino acid metabolism | Amino acid metabolism	Lysine biosynthesis [PATH:ko00300] | Lysine degradation [PATH:ko00310]	1	I10	-	0		-
K00297	Metabolism | Metabolism | Human Diseases	Energy metabolism | Metabolism of cofactors and vitamins | Drug resistance: antineoplastic	Carbon fixation pathways in prokaryotes [PATH:ko00720] | One carbon pool by folate [PATH:ko00670] | Antifolate resistance [PATH:ko01523]	1	I10	-	1	I10	-
K00390	Metabolism	Energy metabolism	Sulfur metabolism [PATH:ko00920]	1	F41	-	1	F41	-
K00564	Brite Hierarchies	Protein families: genetic information processing	Ribosome biogenesis [BR:ko03009]	1	K21	-	0		-
K00600	Metabolism | Metabolism | Metabolism | Metabolism | Metabolism | Human Diseases	Carbohydrate metabolism | Energy metabolism | Amino acid metabolism | Metabolism of other amino acids | Metabolism of cofactors and vitamins | Drug resistance: antineoplastic	Glyoxylate and dicarboxylate metabolism [PATH:ko00630] | Methane metabolism [PATH:ko00680] | Glycine, serine and threonine metabolism [PATH:ko00260] | Cyanoamino acid metabolism [PATH:ko00460] | One carbon pool by folate [PATH:ko00670] | Antifolate resistance [PATH:ko01523]	1	M10	-	0		-
K00603	Metabolism | Metabolism	Amino acid metabolism | Metabolism of cofactors and vitamins	Histidine metabolism [PATH:ko00340] | One carbon pool by folate [PATH:ko00670]	1	M10	-	0		-
K00616	Metabolism	Carbohydrate metabolism	Pentose phosphate pathway [PATH:ko00030]	1	M10	-	0		-
K00620	Metabolism	Amino acid metabolism	Arginine biosynthesis [PATH:ko00220]	1	E78	-	1	E78	-
K00658	Metabolism | Metabolism | Metabolism	Carbohydrate metabolism | Amino acid metabolism | Amino acid metabolism	Citrate cycle (TCA cycle) [PATH:ko00020] | Lysine degradation [PATH:ko00310] | Tryptophan metabolism [PATH:ko00380]	1	M10	-	0		-
K00661	Not Included in Pathway or Brite	Unclassified: metabolism	Enzymes with EC numbers	1	M10	-	0		-
K00666	Brite Hierarchies	Protein families: metabolism	Lipid biosynthesis proteins [BR:ko01004]	1	M10	-	1	M10	-
K00688	Metabolism | Cellular Processes | Cellular Processes | Organismal Systems | Organismal Systems | Human Diseases	Carbohydrate metabolism | Cell growth and death | Cellular community - prokaryotes | Endocrine system | Endocrine system | Endocrine and metabolic disease	Starch and sucrose metabolism [PATH:ko00500] | Necroptosis [PATH:ko04217] | Biofilm formation - Escherichia coli [PATH:ko02026] | Insulin signaling pathway [PATH:ko04910] | Glucagon signaling pathway [PATH:ko04922] | Insulin resistance [PATH:ko04931]	1	K50	-	1	K50	-
K00789	Metabolism	Amino acid metabolism	Cysteine and methionine metabolism [PATH:ko00270]	1	M10	-	0		-
K00794	Metabolism	Metabolism of cofactors and vitamins	Riboflavin metabolism [PATH:ko00740]	1	I10	-	1	I10	-
K00798	Metabolism	Metabolism of cofactors and vitamins	Porphyrin and chlorophyll metabolism [PATH:ko00860]	1	M10	-	0		-
K00820	Metabolism | Metabolism | Human Diseases | Human Diseases | Brite Hierarchies	Carbohydrate metabolism | Amino acid metabolism | Cardiovascular disease | Endocrine and metabolic disease | Protein families: metabolism	Amino sugar and nucleotide sugar metabolism [PATH:ko00520] | Alanine, aspartate and glutamate metabolism [PATH:ko00250] | Diabetic cardiomyopathy [PATH:ko05415] | Insulin resistance [PATH:ko04931] | Peptidases and inhibitors [BR:ko01002]	1	H25	-	1	H25	-
K00844	Metabolism | Metabolism | Metabolism | Metabolism | Metabolism | Metabolism | Metabolism | Environmental Information Processing | Organismal Systems | Organismal Systems | Human Diseases | Human Diseases | Human Diseases | Brite Hierarchies	Carbohydrate metabolism | Carbohydrate metabolism | Carbohydrate metabolism | Carbohydrate metabolism | Carbohydrate metabolism | Biosynthesis of other secondary metabolites | Biosynthesis of other secondary metabolites | Signal transduction | Endocrine system | Digestive system | Cancer: overview | Infectious disease: bacterial | Endocrine and metabolic disease | Protein families: genetic inform…	Glycolysis / Gluconeogenesis [PATH:ko00010] | Fructose and mannose metabolism [PATH:ko00051] | Galactose metabolism [PATH:ko00052] | Starch and sucrose metabolism [PATH:ko00500] | Amino sugar and nucleotide sugar metabolism [PATH:ko00520] | Streptomycin biosynthesis [PATH:ko00521] | Neomycin, kanamycin and gentamicin biosynthesis [PATH:ko00524] | HIF-1 signaling pathway [PATH:ko04066] | Insulin s…	1	M10	-	1	M10	-
K00860	Metabolism | Metabolism	Energy metabolism | Nucleotide metabolism	Sulfur metabolism [PATH:ko00920] | Purine metabolism [PATH:ko00230]	1	I10	-	0		-
K00930	Metabolism	Amino acid metabolism	Arginine biosynthesis [PATH:ko00220]	1	K50	-	1	K50	-
K00937	Metabolism | Genetic Information Processing | Brite Hierarchies	Energy metabolism | Folding, sorting and degradation | Protein families: genetic information processing	Oxidative phosphorylation [PATH:ko00190] | RNA degradation [PATH:ko03018] | Messenger RNA biogenesis [BR:ko03019]	1	K50	-	1	K50	-
K00956	Metabolism | Metabolism | Metabolism | Metabolism	Energy metabolism | Nucleotide metabolism | Metabolism of other amino acids | Biosynthesis of other secondary metabolites	Sulfur metabolism [PATH:ko00920] | Purine metabolism [PATH:ko00230] | Selenocompound metabolism [PATH:ko00450] | Monobactam biosynthesis [PATH:ko00261]	1	I10	-	1	I10	-
K00972	Metabolism	Carbohydrate metabolism	Amino sugar and nucleotide sugar metabolism [PATH:ko00520]	1	I11	-	1	I11	-
K00975	Metabolism | Metabolism | Cellular Processes	Carbohydrate metabolism | Carbohydrate metabolism | Cellular community - prokaryotes	Starch and sucrose metabolism [PATH:ko00500] | Amino sugar and nucleotide sugar metabolism [PATH:ko00520] | Biofilm formation - Escherichia coli [PATH:ko02026]	1	I11	-	0		-
K00986	Not Included in Pathway or Brite	Unclassified: metabolism	Enzymes with EC numbers	1	J20	-	0		-
K01006	Metabolism | Metabolism | Metabolism | Metabolism	Carbohydrate metabolism | Carbohydrate metabolism | Energy metabolism | Energy metabolism	Glycolysis / Gluconeogenesis [PATH:ko00010] | Pyruvate metabolism [PATH:ko00620] | Carbon fixation in photosynthetic organisms [PATH:ko00710] | Carbon fixation pathways in prokaryotes [PATH:ko00720]	1	M10	-	0		-
K01051	Metabolism | Environmental Information Processing	Carbohydrate metabolism | Signal transduction	Pentose and glucuronate interconversions [PATH:ko00040] | Two-component system [PATH:ko02020]	1	M10	-	0		-
K01057	Metabolism	Carbohydrate metabolism	Pentose phosphate pathway [PATH:ko00030]	1	M10	-	0		-
K01077	Metabolism | Metabolism | Environmental Information Processing | Brite Hierarchies | Brite Hierarchies	Metabolism of cofactors and vitamins | Metabolism of cofactors and vitamins | Signal transduction | Protein families: signaling and cellular processes | Protein families: signaling and cellular processes	Thiamine metabolism [PATH:ko00730] | Folate biosynthesis [PATH:ko00790] | Two-component system [PATH:ko02020] | Exosome [BR:ko04147] | Glycosylphosphatidylinositol (GPI)-anchored proteins [BR:ko00537]	1	M10	-	0		-
K01082	Metabolism | Brite Hierarchies	Energy metabolism | Protein families: genetic information processing	Sulfur metabolism [PATH:ko00920] | Transfer RNA biogenesis [BR:ko03016]	1	M10	-	0		-
K01092	Metabolism | Metabolism | Environmental Information Processing	Carbohydrate metabolism | Biosynthesis of other secondary metabolites | Signal transduction	Inositol phosphate metabolism [PATH:ko00562] | Streptomycin biosynthesis [PATH:ko00521] | Phosphatidylinositol signaling system [PATH:ko04070]	1	M10	-	0		-
K01163	Not Included in Pathway or Brite	Poorly characterized	Function unknown	1	I10	-	0		-
K01190	Metabolism | Metabolism | Metabolism	Carbohydrate metabolism | Lipid metabolism | Glycan biosynthesis and metabolism	Galactose metabolism [PATH:ko00052] | Sphingolipid metabolism [PATH:ko00600] | Other glycan degradation [PATH:ko00511]	1	M10	-	0		-
K01191	Metabolism | Brite Hierarchies	Glycan biosynthesis and metabolism | Protein families: genetic information processing	Other glycan degradation [PATH:ko00511] | Membrane trafficking [BR:ko04131]	1	M10	-	0		-
K01197	Metabolism | Cellular Processes | Brite Hierarchies | Brite Hierarchies | Brite Hierarchies	Glycan biosynthesis and metabolism | Transport and catabolism | Protein families: signaling and cellular processes | Protein families: signaling and cellular processes | Protein families: signaling and cellular processes	Glycosaminoglycan degradation [PATH:ko00531] | Lysosome [PATH:ko04142] | Bacterial toxins [BR:ko02042] | Glycosaminoglycan binding proteins [BR:ko00536] | Glycosylphosphatidylinositol (GPI)-anchored proteins [BR:ko00537]	1	I10	-	0		-
K01201	Metabolism | Metabolism | Cellular Processes	Lipid metabolism | Glycan biosynthesis and metabolism | Transport and catabolism	Sphingolipid metabolism [PATH:ko00600] | Other glycan degradation [PATH:ko00511] | Lysosome [PATH:ko04142]	1	K21	-	0		-
K01205	Metabolism | Cellular Processes | Brite Hierarchies	Glycan biosynthesis and metabolism | Transport and catabolism | Protein families: signaling and cellular processes	Glycosaminoglycan degradation [PATH:ko00531] | Lysosome [PATH:ko04142] | Exosome [BR:ko04147]	1	E78	-	1	E78	-
K01267	Brite Hierarchies | Brite Hierarchies	Protein families: metabolism | Protein families: genetic information processing	Peptidases and inhibitors [BR:ko01002] | Membrane trafficking [BR:ko04131]	1	M10	-	0		-
K01308	Brite Hierarchies	Protein families: metabolism	Peptidases and inhibitors [BR:ko01002]	1	M10	-	0		-
K01356	Brite Hierarchies | Brite Hierarchies	Protein families: metabolism | Protein families: genetic information processing	Peptidases and inhibitors [BR:ko01002] | DNA repair and recombination proteins [BR:ko03400]	1	M10	-	0		-
K01425	Metabolism | Metabolism | Metabolism | Environmental Information Processing | Organismal Systems | Organismal Systems | Organismal Systems | Human Diseases | Human Diseases	Amino acid metabolism | Amino acid metabolism | Metabolism of other amino acids | Signal transduction | Excretory system | Nervous system | Nervous system | Cancer: overview | Cancer: overview	Alanine, aspartate and glutamate metabolism [PATH:ko00250] | Arginine biosynthesis [PATH:ko00220] | D-Glutamine and D-glutamate metabolism [PATH:ko00471] | Two-component system [PATH:ko02020] | Proximal tubule bicarbonate reclamation [PATH:ko04964] | Glutamatergic synapse [PATH:ko04724] | GABAergic synapse [PATH:ko04727] | MicroRNAs in cancer [PATH:ko05206] | Central carbon metabolism in cancer […	1	M10	-	0		-
K01443	Metabolism	Carbohydrate metabolism	Amino sugar and nucleotide sugar metabolism [PATH:ko00520]	1	K50	-	1	K50	-
K01449	Not Included in Pathway or Brite	Unclassified: metabolism	Enzymes with EC numbers	1	M10	-	1	M10	-
K01476	Metabolism | Metabolism | Human Diseases	Amino acid metabolism | Amino acid metabolism | Infectious disease: parasitic	Arginine biosynthesis [PATH:ko00220] | Arginine and proline metabolism [PATH:ko00330] | Amoebiasis [PATH:ko05146]	1	M10	-	0		-
K01478	Metabolism	Amino acid metabolism	Arginine biosynthesis [PATH:ko00220]	1	I10	-	0		-
K01488	Metabolism | Human Diseases	Nucleotide metabolism | Immune disease	Purine metabolism [PATH:ko00230] | Primary immunodeficiency [PATH:ko05340]	1	I11	-	1	I11	-
K01507	Metabolism	Energy metabolism	Oxidative phosphorylation [PATH:ko00190]	1	M10	-	1	M10	-
K01547	Environmental Information Processing	Signal transduction	Two-component system [PATH:ko02020]	1	M10	-	1	M10	-
K01548	Environmental Information Processing	Signal transduction	Two-component system [PATH:ko02020]	1	M10	-	1	M10	-
K01567	Not Included in Pathway or Brite	Unclassified: metabolism	Enzymes with EC numbers	1	M10	-	0		-
K01580	Metabolism | Metabolism | Metabolism | Metabolism | Cellular Processes | Organismal Systems | Human Diseases	Carbohydrate metabolism | Amino acid metabolism | Metabolism of other amino acids | Metabolism of other amino acids | Cellular community - prokaryotes | Nervous system | Endocrine and metabolic disease	Butanoate metabolism [PATH:ko00650] | Alanine, aspartate and glutamate metabolism [PATH:ko00250] | beta-Alanine metabolism [PATH:ko00410] | Taurine and hypotaurine metabolism [PATH:ko00430] | Quorum sensing [PATH:ko02024] | GABAergic synapse [PATH:ko04727] | Type I diabetes mellitus [PATH:ko04940]	1	M10	-	0		-
K01629	Metabolism | Metabolism	Carbohydrate metabolism | Carbohydrate metabolism	Pentose and glucuronate interconversions [PATH:ko00040] | Fructose and mannose metabolism [PATH:ko00051]	1	I10	-	1	I10	-
K01673	Metabolism	Energy metabolism	Nitrogen metabolism [PATH:ko00910]	1	M10	-	0		-
K01677	Metabolism | Metabolism | Metabolism	Carbohydrate metabolism | Carbohydrate metabolism | Energy metabolism	Citrate cycle (TCA cycle) [PATH:ko00020] | Pyruvate metabolism [PATH:ko00620] | Carbon fixation pathways in prokaryotes [PATH:ko00720]	1	I11	-	0		-
K01687	Metabolism | Metabolism	Amino acid metabolism | Metabolism of cofactors and vitamins	Valine, leucine and isoleucine biosynthesis [PATH:ko00290] | Pantothenate and CoA biosynthesis [PATH:ko00770]	1	I10	-	0		-
K01711	Metabolism | Metabolism | Metabolism	Carbohydrate metabolism | Carbohydrate metabolism | Glycan biosynthesis and metabolism	Fructose and mannose metabolism [PATH:ko00051] | Amino sugar and nucleotide sugar metabolism [PATH:ko00520] | O-Antigen nucleotide sugar biosynthesis [PATH:ko00541]	1	I10	-	1	I10	-
K01734	Metabolism	Carbohydrate metabolism	Propanoate metabolism [PATH:ko00640]	1	I10	-	0		-
K01787	Metabolism	Carbohydrate metabolism	Amino sugar and nucleotide sugar metabolism [PATH:ko00520]	1	K50	-	1	K50	-
K01805	Metabolism | Metabolism	Carbohydrate metabolism | Carbohydrate metabolism	Pentose and glucuronate interconversions [PATH:ko00040] | Fructose and mannose metabolism [PATH:ko00051]	1	M10	-	0		-
K01811	Not Included in Pathway or Brite	Unclassified: metabolism	Enzymes with EC numbers	1	M10	-	0		-
K01834	Metabolism | Metabolism | Metabolism | Organismal Systems | Human Diseases | Brite Hierarchies | Brite Hierarchies	Carbohydrate metabolism | Energy metabolism | Amino acid metabolism | Endocrine system | Cancer: overview | Protein families: genetic information processing | Protein families: signaling and cellular processes	Glycolysis / Gluconeogenesis [PATH:ko00010] | Methane metabolism [PATH:ko00680] | Glycine, serine and threonine metabolism [PATH:ko00260] | Glucagon signaling pathway [PATH:ko04922] | Central carbon metabolism in cancer [PATH:ko05230] | Membrane trafficking [BR:ko04131] | Exosome [BR:ko04147]	1	M10	-	1	M10	-
K01835	Metabolism | Metabolism | Metabolism | Metabolism | Metabolism | Metabolism | Metabolism	Carbohydrate metabolism | Carbohydrate metabolism | Carbohydrate metabolism | Carbohydrate metabolism | Carbohydrate metabolism | Nucleotide metabolism | Biosynthesis of other secondary metabolites	Glycolysis / Gluconeogenesis [PATH:ko00010] | Pentose phosphate pathway [PATH:ko00030] | Galactose metabolism [PATH:ko00052] | Starch and sucrose metabolism [PATH:ko00500] | Amino sugar and nucleotide sugar metabolism [PATH:ko00520] | Purine metabolism [PATH:ko00230] | Streptomycin biosynthesis [PATH:ko00521]	1	I11	-	0		-
K01843	Metabolism	Amino acid metabolism	Lysine degradation [PATH:ko00310]	1	M10	-	1	M10	-
K01847	Metabolism | Metabolism | Metabolism | Metabolism	Carbohydrate metabolism | Carbohydrate metabolism | Energy metabolism | Amino acid metabolism	Glyoxylate and dicarboxylate metabolism [PATH:ko00630] | Propanoate metabolism [PATH:ko00640] | Carbon fixation pathways in prokaryotes [PATH:ko00720] | Valine, leucine and isoleucine degradation [PATH:ko00280]	1	M10	-	0		-
K01868	Genetic Information Processing | Brite Hierarchies | Brite Hierarchies	Translation | Protein families: metabolism | Protein families: genetic information processing	Aminoacyl-tRNA biosynthesis [PATH:ko00970] | Amino acid related enzymes [BR:ko01007] | Transfer RNA biogenesis [BR:ko03016]	1	M10	-	0		-
K01881	Genetic Information Processing | Brite Hierarchies | Brite Hierarchies	Translation | Protein families: metabolism | Protein families: genetic information processing	Aminoacyl-tRNA biosynthesis [PATH:ko00970] | Amino acid related enzymes [BR:ko01007] | Transfer RNA biogenesis [BR:ko03016]	1	I10	-	0		-
K01916	Metabolism	Metabolism of cofactors and vitamins	Nicotinate and nicotinamide metabolism [PATH:ko00760]	1	F41	-	0		-
K01935	Metabolism	Metabolism of cofactors and vitamins	Biotin metabolism [PATH:ko00780]	1	M10	-	0		-
K01937	Metabolism	Nucleotide metabolism	Pyrimidine metabolism [PATH:ko00240]	1	M10	-	1	M10	-
K01961	Metabolism | Metabolism | Metabolism | Metabolism	Carbohydrate metabolism | Carbohydrate metabolism | Energy metabolism | Lipid metabolism	Pyruvate metabolism [PATH:ko00620] | Propanoate metabolism [PATH:ko00640] | Carbon fixation pathways in prokaryotes [PATH:ko00720] | Fatty acid biosynthesis [PATH:ko00061]	1	M10	-	1	M10	-
K01966	Metabolism | Metabolism | Metabolism	Carbohydrate metabolism | Carbohydrate metabolism | Amino acid metabolism	Glyoxylate and dicarboxylate metabolism [PATH:ko00630] | Propanoate metabolism [PATH:ko00640] | Valine, leucine and isoleucine degradation [PATH:ko00280]	1	M10	-	0		-
K02000	Environmental Information Processing | Brite Hierarchies	Membrane transport | Protein families: signaling and cellular processes	ABC transporters [PATH:ko02010] | Transporters [BR:ko02000]	1	M10	-	1	M10	-
K02001	Environmental Information Processing | Brite Hierarchies	Membrane transport | Protein families: signaling and cellular processes	ABC transporters [PATH:ko02010] | Transporters [BR:ko02000]	1	M10	-	0		-
K02014	Brite Hierarchies	Protein families: signaling and cellular processes	Transporters [BR:ko02000]	1	I11	-	0		-
K02031	Cellular Processes | Brite Hierarchies	Cellular community - prokaryotes | Protein families: signaling and cellular processes	Quorum sensing [PATH:ko02024] | Transporters [BR:ko02000]	1	E78	-	1	E78	-
K02033	Cellular Processes | Brite Hierarchies	Cellular community - prokaryotes | Protein families: signaling and cellular processes	Quorum sensing [PATH:ko02024] | Transporters [BR:ko02000]	1	E78	-	1	E78	-
K02034	Cellular Processes | Brite Hierarchies	Cellular community - prokaryotes | Protein families: signaling and cellular processes	Quorum sensing [PATH:ko02024] | Transporters [BR:ko02000]	1	E78	-	1	E78	-
K02035	Cellular Processes | Brite Hierarchies	Cellular community - prokaryotes | Protein families: signaling and cellular processes	Quorum sensing [PATH:ko02024] | Transporters [BR:ko02000]	1	E78	-	1	E78	-
K02056	Brite Hierarchies	Protein families: signaling and cellular processes	Transporters [BR:ko02000]	1	I10	-	0		-
K02068	Brite Hierarchies	Protein families: signaling and cellular processes	Transporters [BR:ko02000]	1	M10	-	1	M10	-
K02069	Brite Hierarchies	Protein families: signaling and cellular processes	Transporters [BR:ko02000]	1	M10	-	0		-
K02190	Metabolism	Metabolism of cofactors and vitamins	Porphyrin and chlorophyll metabolism [PATH:ko00860]	1	M10	-	0		-
K02224	Metabolism	Metabolism of cofactors and vitamins	Porphyrin and chlorophyll metabolism [PATH:ko00860]	1	I10	-	0		-
K02226	Metabolism	Metabolism of cofactors and vitamins	Porphyrin and chlorophyll metabolism [PATH:ko00860]	1	I10	-	0		-
K02227	Metabolism	Metabolism of cofactors and vitamins	Porphyrin and chlorophyll metabolism [PATH:ko00860]	1	I10	-	0		-
K02230	Metabolism	Metabolism of cofactors and vitamins	Porphyrin and chlorophyll metabolism [PATH:ko00860]	1	M10	-	0		-
K02283	Brite Hierarchies | Brite Hierarchies	Protein families: signaling and cellular processes | Protein families: signaling and cellular processes	Secretion system [BR:ko02044] | Bacterial motility proteins [BR:ko02035]	1	I11	-	1	I11	-
K02371	Metabolism | Brite Hierarchies	Lipid metabolism | Protein families: metabolism	Fatty acid biosynthesis [PATH:ko00061] | Lipid biosynthesis proteins [BR:ko01004]	1	I10	-	0		-
K02377	Metabolism | Metabolism | Metabolism	Carbohydrate metabolism | Carbohydrate metabolism | Glycan biosynthesis and metabolism	Fructose and mannose metabolism [PATH:ko00051] | Amino sugar and nucleotide sugar metabolism [PATH:ko00520] | O-Antigen nucleotide sugar biosynthesis [PATH:ko00541]	1	I10	-	1	I10	-
K02405	Environmental Information Processing | Cellular Processes | Cellular Processes | Cellular Processes | Cellular Processes | Brite Hierarchies | Brite Hierarchies	Signal transduction | Cellular community - prokaryotes | Cellular community - prokaryotes | Cellular community - prokaryotes | Cell motility | Protein families: genetic information processing | Protein families: signaling and cellular processes	Two-component system [PATH:ko02020] | Biofilm formation - Vibrio cholerae [PATH:ko05111] | Biofilm formation - Pseudomonas aeruginosa [PATH:ko02025] | Biofilm formation - Escherichia coli [PATH:ko02026] | Flagellar assembly [PATH:ko02040] | Transcription machinery [BR:ko03021] | Bacterial motility proteins [BR:ko02035]	1	I11	-	0		-
K02433	Genetic Information Processing | Brite Hierarchies	Translation | Protein families: genetic information processing	Aminoacyl-tRNA biosynthesis [PATH:ko00970] | Mitochondrial biogenesis [BR:ko03029]	1	I11	-	0		-
K02470	Brite Hierarchies | Brite Hierarchies	Protein families: genetic information processing | Protein families: genetic information processing	DNA replication proteins [BR:ko03032] | DNA repair and recombination proteins [BR:ko03400]	1	I10	-	0		-
K02474	Metabolism | Metabolism	Carbohydrate metabolism | Glycan biosynthesis and metabolism	Amino sugar and nucleotide sugar metabolism [PATH:ko00520] | O-Antigen nucleotide sugar biosynthesis [PATH:ko00541]	1	E10	-	1	E10	-
K02566	Not Included in Pathway or Brite	Unclassified: metabolism	Carbohydrate metabolism	1	M10	-	0		-
K02652	Brite Hierarchies | Brite Hierarchies	Protein families: signaling and cellular processes | Protein families: signaling and cellular processes	Secretion system [BR:ko02044] | Bacterial motility proteins [BR:ko02035]	1	I11	-	1	I11	-
K02669	Brite Hierarchies | Brite Hierarchies	Protein families: signaling and cellular processes | Protein families: signaling and cellular processes	Secretion system [BR:ko02044] | Bacterial motility proteins [BR:ko02035]	1	I11	-	1	I11	-
K02824	Brite Hierarchies	Protein families: signaling and cellular processes	Transporters [BR:ko02000]	1	I10	-	0		-
K02874	Genetic Information Processing | Brite Hierarchies	Translation | Protein families: genetic information processing	Ribosome [PATH:ko03010] | Ribosome [BR:ko03011]	1	M10	-	0		-
K02878	Genetic Information Processing | Brite Hierarchies	Translation | Protein families: genetic information processing	Ribosome [PATH:ko03010] | Ribosome [BR:ko03011]	1	M10	-	1	M10	-
K02988	Genetic Information Processing | Brite Hierarchies	Translation | Protein families: genetic information processing	Ribosome [PATH:ko03010] | Ribosome [BR:ko03011]	1	M10	-	0		-
K03086	Cellular Processes | Brite Hierarchies	Cell motility | Protein families: genetic information processing	Flagellar assembly [PATH:ko02040] | Transcription machinery [BR:ko03021]	1	K50	-	1	K50	-
K03110	Genetic Information Processing | Environmental Information Processing | Cellular Processes | Brite Hierarchies	Folding, sorting and degradation | Membrane transport | Cellular community - prokaryotes | Protein families: signaling and cellular processes	Protein export [PATH:ko03060] | Bacterial secretion system [PATH:ko03070] | Quorum sensing [PATH:ko02024] | Secretion system [BR:ko02044]	1	I10	-	0		-
K03113	Genetic Information Processing | Brite Hierarchies	Translation | Protein families: genetic information processing	RNA transport [PATH:ko03013] | Translation factors [BR:ko03012]	1	E78	-	1	E78	-
K03150	Metabolism	Metabolism of cofactors and vitamins	Thiamine metabolism [PATH:ko00730]	1	M10	-	1	M10	-
K03151	Metabolism | Genetic Information Processing | Brite Hierarchies	Metabolism of cofactors and vitamins | Folding, sorting and degradation | Protein families: genetic information processing	Thiamine metabolism [PATH:ko00730] | Sulfur relay system [PATH:ko04122] | Transfer RNA biogenesis [BR:ko03016]	1	I10	-	1	I10	-
K03215	Brite Hierarchies	Protein families: genetic information processing	Ribosome biogenesis [BR:ko03009]	1	M10	-	1	M10	-
K03307	Not Included in Pathway or Brite	Unclassified: signaling and cellular processes	Transport	1	M10	-	1	M10	-
K03322	Brite Hierarchies	Protein families: signaling and cellular processes	Transporters [BR:ko02000]	1	M10	-	1	M10	-
K03325	Brite Hierarchies	Protein families: signaling and cellular processes	Transporters [BR:ko02000]	1	M10	-	1	M10	-
K03385	Metabolism	Energy metabolism	Nitrogen metabolism [PATH:ko00910]	1	M10	-	1	M10	-
K03386	Cellular Processes | Brite Hierarchies	Cell growth and death | Protein families: signaling and cellular processes	Apoptosis - fly [PATH:ko04214] | Exosome [BR:ko04147]	1	M10	-	0		-
K03430	Metabolism | Brite Hierarchies	Metabolism of other amino acids | Protein families: metabolism	Phosphonate and phosphinate metabolism [PATH:ko00440] | Amino acid related enzymes [BR:ko01007]	1	M10	-	1	M10	-
K03455	Not Included in Pathway or Brite	Unclassified: signaling and cellular processes	Transport	1	I10	-	0		-
K03470	Genetic Information Processing | Brite Hierarchies	Replication and repair | Protein families: genetic information processing	DNA replication [PATH:ko03030] | DNA replication proteins [BR:ko03032]	1	I10	-	0		-
K03474	Metabolism	Metabolism of cofactors and vitamins	Vitamin B6 metabolism [PATH:ko00750]	1	E78	-	1	E78	-
K03501	Brite Hierarchies | Brite Hierarchies	Protein families: genetic information processing | Protein families: genetic information processing	Ribosome biogenesis [BR:ko03009] | Chromosome and associated proteins [BR:ko03036]	1	M10	-	0		-
K03502	Brite Hierarchies	Protein families: genetic information processing	DNA repair and recombination proteins [BR:ko03400]	1	M10	-	0		-
K03523	Environmental Information Processing | Brite Hierarchies	Membrane transport | Protein families: signaling and cellular processes	ABC transporters [PATH:ko02010] | Transporters [BR:ko02000]	1	E78	-	1	E78	-
K03529	Brite Hierarchies	Protein families: genetic information processing	Chromosome and associated proteins [BR:ko03036]	1	I11	-	0		-
K03534	Not Included in Pathway or Brite	Unclassified: metabolism	Enzymes with EC numbers	1	I10	-	0		-
K03546	Brite Hierarchies	Protein families: genetic information processing	DNA repair and recombination proteins [BR:ko03400]	1	M10	-	0		-
K03555	Genetic Information Processing | Brite Hierarchies	Replication and repair | Protein families: genetic information processing	Mismatch repair [PATH:ko03430] | DNA repair and recombination proteins [BR:ko03400]	1	M10	-	1	M10	-
K03558	Not Included in Pathway or Brite	Poorly characterized	General function prediction only	1	M10	-	1	M10	-
K03569	Brite Hierarchies | Brite Hierarchies | Brite Hierarchies	Protein families: genetic information processing | Protein families: signaling and cellular processes | Protein families: signaling and cellular processes	Chromosome and associated proteins [BR:ko03036] | Cytoskeleton proteins [BR:ko04812] | Prokaryotic defense system [BR:ko02048]	1	M10	-	0		-
K03574	Brite Hierarchies	Protein families: genetic information processing	DNA repair and recombination proteins [BR:ko03400]	1	M10	-	0		-
K03575	Genetic Information Processing | Brite Hierarchies	Replication and repair | Protein families: genetic information processing	Base excision repair [PATH:ko03410] | DNA repair and recombination proteins [BR:ko03400]	1	I11	-	1	I11	-
K03606	Cellular Processes	Cellular community - prokaryotes	Biofilm formation - Vibrio cholerae [PATH:ko05111]	1	I11	-	0		-
K03609	Brite Hierarchies | Brite Hierarchies	Protein families: genetic information processing | Protein families: signaling and cellular processes	Chromosome and associated proteins [BR:ko03036] | Cytoskeleton proteins [BR:ko04812]	1	I11	-	1	I11	-
K03660	Genetic Information Processing | Brite Hierarchies	Replication and repair | Protein families: genetic information processing	Base excision repair [PATH:ko03410] | DNA repair and recombination proteins [BR:ko03400]	1	M10	-	0		-
K03695	Organismal Systems | Brite Hierarchies	Aging | Protein families: genetic information processing	Longevity regulating pathway - multiple species [PATH:ko04213] | Chaperones and folding catalysts [BR:ko03110]	1	I10	-	0		-
K03698	Brite Hierarchies	Protein families: genetic information processing	Messenger RNA biogenesis [BR:ko03019]	1	I11	-	1	I11	-
K03741	Not Included in Pathway or Brite	Unclassified: metabolism	Enzymes with EC numbers	1	J20	-	0		-
K03763	Genetic Information Processing | Genetic Information Processing | Genetic Information Processing | Brite Hierarchies | Brite Hierarchies	Replication and repair | Replication and repair | Replication and repair | Protein families: genetic information processing | Protein families: genetic information processing	DNA replication [PATH:ko03030] | Mismatch repair [PATH:ko03430] | Homologous recombination [PATH:ko03440] | DNA replication proteins [BR:ko03032] | DNA repair and recombination proteins [BR:ko03400]	1	I11	-	0		-
K03784	Metabolism | Metabolism | Metabolism	Nucleotide metabolism | Nucleotide metabolism | Metabolism of cofactors and vitamins	Purine metabolism [PATH:ko00230] | Pyrimidine metabolism [PATH:ko00240] | Nicotinate and nicotinamide metabolism [PATH:ko00760]	1	M10	-	0		-
K03798	Brite Hierarchies | Brite Hierarchies	Protein families: metabolism | Protein families: genetic information processing	Peptidases and inhibitors [BR:ko01002] | Chaperones and folding catalysts [BR:ko03110]	1	M10	-	1	M10	-
K03803	Brite Hierarchies	Protein families: genetic information processing	Transcription machinery [BR:ko03021]	1	I11	-	1	I11	-
K03818	Not Included in Pathway or Brite	Unclassified: metabolism	Enzymes with EC numbers	1	I10	-	0		-
K03827	Not Included in Pathway or Brite	Unclassified: metabolism	Enzymes with EC numbers	1	M10	-	1	M10	-
K03978	Brite Hierarchies	Protein families: genetic information processing	Chromosome and associated proteins [BR:ko03036]	1	M10	-	1	M10	-
K04043	Genetic Information Processing | Organismal Systems | Human Diseases | Brite Hierarchies | Brite Hierarchies | Brite Hierarchies | Brite Hierarchies	Folding, sorting and degradation | Aging | Infectious disease: bacterial | Protein families: genetic information processing | Protein families: genetic information processing | Protein families: genetic information processing | Protein families: signaling and cellular processes	RNA degradation [PATH:ko03018] | Longevity regulating pathway - worm [PATH:ko04212] | Tuberculosis [PATH:ko05152] | Messenger RNA biogenesis [BR:ko03019] | Chaperones and folding catalysts [BR:ko03110] | Mitochondrial biogenesis [BR:ko03029] | Exosome [BR:ko04147]	1	M10	-	0		-
K04070	Not Included in Pathway or Brite	Unclassified: metabolism	Enzymes with EC numbers	1	M10	-	0		-
K04094	Brite Hierarchies | Brite Hierarchies	Protein families: genetic information processing | Protein families: genetic information processing	Transfer RNA biogenesis [BR:ko03016] | Chromosome and associated proteins [BR:ko03036]	1	M10	-	0		-
K04095	Brite Hierarchies	Protein families: genetic information processing	Chromosome and associated proteins [BR:ko03036]	1	M10	-	1	M10	-
K04487	Metabolism | Genetic Information Processing | Brite Hierarchies | Brite Hierarchies | Brite Hierarchies	Metabolism of cofactors and vitamins | Folding, sorting and degradation | Protein families: genetic information processing | Protein families: genetic information processing | Protein families: signaling and cellular processes	Thiamine metabolism [PATH:ko00730] | Sulfur relay system [PATH:ko04122] | Transfer RNA biogenesis [BR:ko03016] | Mitochondrial biogenesis [BR:ko03029] | Prokaryotic defense system [BR:ko02048]	1	I11	-	1	I11	-
K04488	Not Included in Pathway or Brite	Unclassified: metabolism	Energy metabolism	1	I10	-	0		-
K04567	Genetic Information Processing | Brite Hierarchies | Brite Hierarchies	Translation | Protein families: metabolism | Protein families: genetic information processing	Aminoacyl-tRNA biosynthesis [PATH:ko00970] | Amino acid related enzymes [BR:ko01007] | Transfer RNA biogenesis [BR:ko03016]	1	I10	-	0		-
K04761	Cellular Processes | Brite Hierarchies	Cellular community - prokaryotes | Protein families: genetic information processing	Biofilm formation - Escherichia coli [PATH:ko02026] | Transcription factors [BR:ko03000]	1	M10	-	1	M10	-
K05340	Brite Hierarchies	Protein families: signaling and cellular processes	Transporters [BR:ko02000]	1	M10	-	1	M10	-
K05349	Metabolism | Metabolism | Metabolism	Carbohydrate metabolism | Metabolism of other amino acids | Biosynthesis of other secondary metabolites	Starch and sucrose metabolism [PATH:ko00500] | Cyanoamino acid metabolism [PATH:ko00460] | Phenylpropanoid biosynthesis [PATH:ko00940]	1	K50	-	1	K50	-
K05593	Brite Hierarchies	Protein families: signaling and cellular processes	Antimicrobial resistance genes [BR:ko01504]	1	J02	-	0		-
K05595	Brite Hierarchies	Protein families: signaling and cellular processes	Transporters [BR:ko02000]	1	M10	-	1	M10	-
K05878	Metabolism	Lipid metabolism	Glycerolipid metabolism [PATH:ko00561]	1	E11	-	0		-
K05896	Brite Hierarchies	Protein families: genetic information processing	Chromosome and associated proteins [BR:ko03036]	1	I11	-	1	I11	-
K05919	Not Included in Pathway or Brite	Unclassified: metabolism	Enzymes with EC numbers	1	M10	-	1	M10	-
K06023	Not Included in Pathway or Brite	Unclassified: metabolism	Enzymes with EC numbers	1	I11	-	0		-
K06143	Not Included in Pathway or Brite	Unclassified: signaling and cellular processes	Structural proteins	1	M10	-	1	M10	-
K06148	Brite Hierarchies	Protein families: signaling and cellular processes	Transporters [BR:ko02000]	1	I11	-	1	I11	-
K06168	Brite Hierarchies	Protein families: genetic information processing	Transfer RNA biogenesis [BR:ko03016]	1	M10	-	0		-
K06187	Genetic Information Processing | Brite Hierarchies	Replication and repair | Protein families: genetic information processing	Homologous recombination [PATH:ko03440] | DNA repair and recombination proteins [BR:ko03400]	1	M10	-	0		-
K06206	Not Included in Pathway or Brite	Unclassified: metabolism	Carbohydrate metabolism	1	E78	-	1	E78	-
K06209	Metabolism	Amino acid metabolism	Phenylalanine, tyrosine and tryptophan biosynthesis [PATH:ko00400]	1	E78	-	1	E78	-
K06333	Not Included in Pathway or Brite	Unclassified: signaling and cellular processes	Cell growth	1	M10	-	1	M10	-
K06334	Not Included in Pathway or Brite	Unclassified: signaling and cellular processes	Cell growth	1	M10	-	1	M10	-
K06373	Not Included in Pathway or Brite	Unclassified: signaling and cellular processes	Cell growth	1	M10	-	1	M10	-
K06374	Not Included in Pathway or Brite	Unclassified: signaling and cellular processes	Cell growth	1	M10	-	1	M10	-
K06378	Not Included in Pathway or Brite	Unclassified: signaling and cellular processes	Cell growth	1	M10	-	0		-
K06379	Not Included in Pathway or Brite	Unclassified: metabolism	Enzymes with EC numbers	1	M10	-	0		-
K06387	Not Included in Pathway or Brite	Unclassified: signaling and cellular processes	Cell growth	1	M10	-	1	M10	-
K06399	Brite Hierarchies	Protein families: metabolism	Peptidases and inhibitors [BR:ko01002]	1	M10	-	0		-
K06411	Not Included in Pathway or Brite	Unclassified: signaling and cellular processes	Cell growth	1	M10	-	1	M10	-
K06413	Not Included in Pathway or Brite	Unclassified: signaling and cellular processes	Cell growth	1	M10	-	0		-
K06436	Not Included in Pathway or Brite	Unclassified: signaling and cellular processes	Cell growth	1	M10	-	1	M10	-
K06442	Brite Hierarchies	Protein families: genetic information processing	Ribosome biogenesis [BR:ko03009]	1	I11	-	1	I11	-
K06872	Not Included in Pathway or Brite	Poorly characterized	Function unknown	1	I10	-	0		-
K06901	Brite Hierarchies	Protein families: signaling and cellular processes	Transporters [BR:ko02000]	1	M10	-	0		-
K06911	Not Included in Pathway or Brite	Unclassified: metabolism	Enzymes with EC numbers	1	M10	-	1	M10	-
K06975	Not Included in Pathway or Brite	Poorly characterized	Function unknown	1	M10	-	1	M10	-
K06989	Metabolism	Metabolism of cofactors and vitamins	Nicotinate and nicotinamide metabolism [PATH:ko00760]	1	F41	-	0		-
K07001	Not Included in Pathway or Brite	Poorly characterized	General function prediction only	1	M10	-	0		-
K07003	Not Included in Pathway or Brite	Poorly characterized	Function unknown	1	E10	-	1	E10	-
K07007	Metabolism	Lipid metabolism	Secondary bile acid biosynthesis [PATH:ko00121]	1	M10	-	0		-
K07011	#N/A	#N/A	#N/A	1	M10	-	0		-
K07015	Not Included in Pathway or Brite	Poorly characterized	Function unknown	1	I11	-	0		-
K07030	Not Included in Pathway or Brite	Poorly characterized	Function unknown	1	I11	-	0		-
K07035	Not Included in Pathway or Brite	Poorly characterized	Function unknown	1	M10	-	0		-
K07043	Not Included in Pathway or Brite	Unclassified: metabolism	Enzymes with EC numbers	1	I10	-	1	I10	-
K07078	Not Included in Pathway or Brite	Poorly characterized	Function unknown	1	M10	-	1	M10	-
K07080	Not Included in Pathway or Brite	Poorly characterized	Function unknown	1	E78	-	1	E78	-
K07085	Not Included in Pathway or Brite	Unclassified: signaling and cellular processes	Transport	1	M10	-	0		-
K07090	Not Included in Pathway or Brite	Poorly characterized	Function unknown	1	M10	-	0		-
K07099	Not Included in Pathway or Brite	Poorly characterized	Function unknown	1	M10	-	0		-
K07137	Not Included in Pathway or Brite	Poorly characterized	Function unknown	1	M10	-	0		-
K07150	Not Included in Pathway or Brite	Poorly characterized	Function unknown	1	I11	-	1	I11	-
K07166	Not Included in Pathway or Brite	Unclassified: signaling and cellular processes	Signaling proteins	1	M10	-	0		-
K07238	Brite Hierarchies	Protein families: signaling and cellular processes	Transporters [BR:ko02000]	1	M10	-	0		-
K07271	Not Included in Pathway or Brite	Unclassified: metabolism	Enzymes with EC numbers	1	I10	-	0		-
K07478	Not Included in Pathway or Brite	Unclassified: genetic information processing	Replication and repair	1	M10	-	0		-
K07574	Brite Hierarchies	Protein families: genetic information processing	Ribosome biogenesis [BR:ko03009]	1	I11	-	0		-
K07584	Not Included in Pathway or Brite	Poorly characterized	Function unknown	1	I11	-	1	I11	-
K07588	Not Included in Pathway or Brite	Unclassified: metabolism	Enzymes with EC numbers	1	M10	-	0		-
K07667	Environmental Information Processing | Cellular Processes | Brite Hierarchies	Signal transduction | Cellular community - prokaryotes | Protein families: signaling and cellular processes	Two-component system [PATH:ko02020] | Quorum sensing [PATH:ko02024] | Two-component system [BR:ko02022]	1	E78	-	1	E78	-
K07735	Brite Hierarchies	Protein families: genetic information processing	Transcription factors [BR:ko03000]	1	M10	-	0		-
K07791	Brite Hierarchies	Protein families: signaling and cellular processes	Transporters [BR:ko02000]	1	I10	-	0		-
K08156	Brite Hierarchies	Protein families: signaling and cellular processes	Transporters [BR:ko02000]	1	M10	-	0		-
K08169	Brite Hierarchies	Protein families: signaling and cellular processes	Transporters [BR:ko02000]	1	M10	-	0		-
K08191	Brite Hierarchies	Protein families: signaling and cellular processes	Transporters [BR:ko02000]	1	I11	-	0		-
K08218	Human Diseases | Brite Hierarchies	Drug resistance: antimicrobial | Protein families: signaling and cellular processes	beta-Lactam resistance [PATH:ko01501] | Transporters [BR:ko02000]	1	M10	-	0		-
K08316	Brite Hierarchies	Protein families: genetic information processing	Ribosome biogenesis [BR:ko03009]	1	F41	-	0		-
K08325	Metabolism	Carbohydrate metabolism	Propanoate metabolism [PATH:ko00640]	1	M10	-	1	M10	-
K08384	Metabolism | Brite Hierarchies	Glycan biosynthesis and metabolism | Protein families: metabolism	Peptidoglycan biosynthesis [PATH:ko00550] | Peptidoglycan biosynthesis and degradation proteins [BR:ko01011]	1	M10	-	0		-
K08641	Environmental Information Processing | Human Diseases | Brite Hierarchies | Brite Hierarchies | Brite Hierarchies	Signal transduction | Drug resistance: antimicrobial | Protein families: metabolism | Protein families: metabolism | Protein families: signaling and cellular processes	Two-component system [PATH:ko02020] | Vancomycin resistance [PATH:ko01502] | Peptidases and inhibitors [BR:ko01002] | Peptidoglycan biosynthesis and degradation proteins [BR:ko01011] | Antimicrobial resistance genes [BR:ko01504]	1	M10	-	0		-
K08678	Metabolism	Carbohydrate metabolism	Amino sugar and nucleotide sugar metabolism [PATH:ko00520]	1	M10	-	0		-
K08717	Brite Hierarchies	Protein families: signaling and cellular processes	Transporters [BR:ko02000]	1	M10	-	0		-
K08722	Metabolism	Nucleotide metabolism	Pyrimidine metabolism [PATH:ko00240]	1	M10	-	0		-
K08998	Not Included in Pathway or Brite	Poorly characterized	Function unknown	1	K50	-	1	K50	-
K08999	Not Included in Pathway or Brite	Poorly characterized	Function unknown	1	I10	-	0		-
K09121	Not Included in Pathway or Brite	Unclassified: metabolism	Enzymes with EC numbers	1	E78	-	1	E78	-
K09680	Metabolism	Metabolism of cofactors and vitamins	Pantothenate and CoA biosynthesis [PATH:ko00770]	1	K51	-	1	K51	-
K09697	Environmental Information Processing | Environmental Information Processing | Brite Hierarchies	Membrane transport | Signal transduction | Protein families: signaling and cellular processes	ABC transporters [PATH:ko02010] | Two-component system [PATH:ko02020] | Transporters [BR:ko02000]	1	I11	-	0		-
K09762	Brite Hierarchies	Protein families: genetic information processing	Chromosome and associated proteins [BR:ko03036]	1	I11	-	1	I11	-
K09769	Metabolism | Metabolism	Nucleotide metabolism | Nucleotide metabolism	Purine metabolism [PATH:ko00230] | Pyrimidine metabolism [PATH:ko00240]	1	M10	-	1	M10	-
K09777	Not Included in Pathway or Brite	Unclassified: genetic information processing	Transcription	1	M10	-	0		-
K09779	Not Included in Pathway or Brite	Poorly characterized	Function unknown	1	M10	-	1	M10	-
K10254	Not Included in Pathway or Brite	Unclassified: metabolism	Enzymes with EC numbers	1	M10	-	0		-
K10716	Brite Hierarchies	Protein families: signaling and cellular processes	Transporters [BR:ko02000]	1	I10	-	0		-
K10797	Metabolism	Amino acid metabolism	Phenylalanine metabolism [PATH:ko00360]	1	M10	-	1	M10	-
K10823	Environmental Information Processing | Cellular Processes | Human Diseases | Brite Hierarchies	Membrane transport | Cellular community - prokaryotes | Drug resistance: antimicrobial | Protein families: signaling and cellular processes	ABC transporters [PATH:ko02010] | Quorum sensing [PATH:ko02024] | beta-Lactam resistance [PATH:ko01501] | Transporters [BR:ko02000]	1	I10	-	0		-
K11050	Environmental Information Processing | Brite Hierarchies	Membrane transport | Protein families: signaling and cellular processes	ABC transporters [PATH:ko02010] | Transporters [BR:ko02000]	1	I10	-	1	I10	-
K11051	Environmental Information Processing | Brite Hierarchies	Membrane transport | Protein families: signaling and cellular processes	ABC transporters [PATH:ko02010] | Transporters [BR:ko02000]	1	I10	-	1	I10	-
K11537	Brite Hierarchies	Protein families: signaling and cellular processes	Transporters [BR:ko02000]	1	M10	-	0		-
K11645	Metabolism | Metabolism | Metabolism | Metabolism | Metabolism	Carbohydrate metabolism | Carbohydrate metabolism | Carbohydrate metabolism | Energy metabolism | Energy metabolism	Glycolysis / Gluconeogenesis [PATH:ko00010] | Pentose phosphate pathway [PATH:ko00030] | Fructose and mannose metabolism [PATH:ko00051] | Carbon fixation in photosynthetic organisms [PATH:ko00710] | Methane metabolism [PATH:ko00680]	1	M10	-	1	M10	-
K11927	Genetic Information Processing | Brite Hierarchies	Folding, sorting and degradation | Protein families: genetic information processing	RNA degradation [PATH:ko03018] | Messenger RNA biogenesis [BR:ko03019]	1	M10	-	1	M10	-
K12308	Metabolism	Carbohydrate metabolism	Galactose metabolism [PATH:ko00052]	1	M10	-	1	M10	-
K12340	Environmental Information Processing | Environmental Information Processing | Organismal Systems | Human Diseases | Human Diseases | Human Diseases | Brite Hierarchies | Brite Hierarchies | Brite Hierarchies	Membrane transport | Signal transduction | Environmental adaptation | Infectious disease: bacterial | Drug resistance: antimicrobial | Drug resistance: antimicrobial | Protein families: signaling and cellular processes | Protein families: signaling and cellular processes | Protein families: signaling and cellular processes	Bacterial secretion system [PATH:ko03070] | Two-component system [PATH:ko02020] | Plant-pathogen interaction [PATH:ko04626] | Pertussis [PATH:ko05133] | beta-Lactam resistance [PATH:ko01501] | Cationic antimicrobial peptide (CAMP) resistance [PATH:ko01503] | Transporters [BR:ko02000] | Secretion system [BR:ko02044] | Antimicrobial resistance genes [BR:ko01504]	1	I11	-	0		-
K12343	Metabolism	Lipid metabolism	Steroid hormone biosynthesis [PATH:ko00140]	1	M10	-	0		-
K12952	Not Included in Pathway or Brite	Unclassified: metabolism	Enzymes with EC numbers	1	I10	-	0		-
K13821	Metabolism | Metabolism | Brite Hierarchies	Amino acid metabolism | Amino acid metabolism | Protein families: genetic information processing	Alanine, aspartate and glutamate metabolism [PATH:ko00250] | Arginine and proline metabolism [PATH:ko00330] | Transcription factors [BR:ko03000]	1	M10	-	0		-
K15051	Not Included in Pathway or Brite | Not Included in Pathway or Brite	Unclassified: metabolism | Unclassified: signaling and cellular processes	Nucleotide metabolism | Unclassified viral proteins	1	I11	-	0		-
K15725	Brite Hierarchies	Protein families: signaling and cellular processes	Transporters [BR:ko02000]	1	M10	-	1	M10	-
K15921	Metabolism	Carbohydrate metabolism	Amino sugar and nucleotide sugar metabolism [PATH:ko00520]	1	D51	-	1	D51	-
K15923	Metabolism	Glycan biosynthesis and metabolism	Other glycan degradation [PATH:ko00511]	1	K21	-	0		-
K15977	Not Included in Pathway or Brite	Unclassified: metabolism	Others	1	M10	-	0		-
K16053	Brite Hierarchies	Protein families: signaling and cellular processes	Transporters [BR:ko02000]	1	M10	-	0		-
K16055	Metabolism | Brite Hierarchies	Carbohydrate metabolism | Protein families: metabolism	Starch and sucrose metabolism [PATH:ko00500] | Glycosyltransferases [BR:ko01003]	1	M10	-	0		-
K16209	Brite Hierarchies	Protein families: signaling and cellular processes	Transporters [BR:ko02000]	1	I10	-	1	I10	-
K17680	Human Diseases | Brite Hierarchies	Neurodegenerative disease | Protein families: genetic information processing	Spinocerebellar ataxia [PATH:ko05017] | Mitochondrial biogenesis [BR:ko03029]	1	M10	-	0		-
K17836	Metabolism | Human Diseases | Brite Hierarchies	Biosynthesis of other secondary metabolites | Drug resistance: antimicrobial | Protein families: signaling and cellular processes	Penicillin and cephalosporin biosynthesis [PATH:ko00311] | beta-Lactam resistance [PATH:ko01501] | Antimicrobial resistance genes [BR:ko01504]	1	J20	-	0		-
K18138	Human Diseases | Human Diseases | Brite Hierarchies | Brite Hierarchies	Drug resistance: antimicrobial | Drug resistance: antimicrobial | Protein families: signaling and cellular processes | Protein families: signaling and cellular processes	beta-Lactam resistance [PATH:ko01501] | Cationic antimicrobial peptide (CAMP) resistance [PATH:ko01503] | Transporters [BR:ko02000] | Antimicrobial resistance genes [BR:ko01504]	1	M10	-	1	M10	-
K18682	Genetic Information Processing | Brite Hierarchies	Folding, sorting and degradation | Protein families: genetic information processing	RNA degradation [PATH:ko03018] | Messenger RNA biogenesis [BR:ko03019]	1	M10	-	0		-
K18785	Not Included in Pathway or Brite	Unclassified: metabolism	Enzymes with EC numbers	1	M10	-	1	M10	-
K18889	Environmental Information Processing | Brite Hierarchies	Membrane transport | Protein families: signaling and cellular processes	ABC transporters [PATH:ko02010] | Transporters [BR:ko02000]	1	I10	-	1	I10	-
K18890	Environmental Information Processing | Brite Hierarchies	Membrane transport | Protein families: signaling and cellular processes	ABC transporters [PATH:ko02010] | Transporters [BR:ko02000]	1	I10	-	1	I10	-
K19221	Metabolism	Metabolism of cofactors and vitamins	Porphyrin and chlorophyll metabolism [PATH:ko00860]	1	J02	-	0		-
K19294	Not Included in Pathway or Brite	Unclassified: metabolism	Glycan metabolism	1	M10	-	0		-
K19405	Not Included in Pathway or Brite	Unclassified: metabolism	Enzymes with EC numbers	1	M10	-	0		-
K19545	Brite Hierarchies	Protein families: signaling and cellular processes	Antimicrobial resistance genes [BR:ko01504]	1	L70	-	1	L70	-
K19689	Brite Hierarchies	Protein families: metabolism	Peptidases and inhibitors [BR:ko01002]	1	M10	-	0		-
K20265	Cellular Processes | Brite Hierarchies	Cellular community - prokaryotes | Protein families: signaling and cellular processes	Quorum sensing [PATH:ko02024] | Transporters [BR:ko02000]	1	M10	-	0		-
K20276	Cellular Processes	Cellular community - prokaryotes	Quorum sensing [PATH:ko02024]	1	E11	-	1	E11	-
K20866	Metabolism	Carbohydrate metabolism	Glycolysis / Gluconeogenesis [PATH:ko00010]	1	I10	-	0		-
K21029	Genetic Information Processing	Folding, sorting and degradation	Sulfur relay system [PATH:ko04122]	1	I10	-	0		-
K21065	Not Included in Pathway or Brite	Unclassified: metabolism	Enzymes with EC numbers	1	M10	-	0		-
K21672	Metabolism | Metabolism | Metabolism	Amino acid metabolism | Amino acid metabolism | Metabolism of other amino acids	Lysine degradation [PATH:ko00310] | Arginine and proline metabolism [PATH:ko00330] | D-Arginine and D-ornithine metabolism [PATH:ko00472]	1	M10	-	1	M10	-
K21681	Metabolism	Carbohydrate metabolism	Pentose and glucuronate interconversions [PATH:ko00040]	1	K50	-	1	K50	-
K21903	Brite Hierarchies	Protein families: genetic information processing	Transcription factors [BR:ko03000]	1	I11	-	1	I11	-
K01012	Metabolism	Metabolism of cofactors and vitamins	Biotin metabolism [PATH:ko00780]	0		-	1	D50	-
